# Supplementary material for: Ring opening and skeletal reconstruction of 3-vinyl benzofuranone-chromone synthons: catalyst-free access to skeletally-diverse 2-pyridone and optically active imidazoline derivatives
Source: Royal Society of Chemistry journal article supplement (doi:10.1039/d1ob02432a), 2022-01-01

# Ring opening and skeletal reconstruction of 3-vinyl benzofuranone-chromone synthons: catalyst-free access to skeletally-diverse 2-pyridone and optically active imidazoline derivatives

Wei-Na Wang,<sup>a,b</sup> Ren-Ming Liu,<sup>a,b</sup> Lei Zhang,<sup>a,b</sup> Xiong-Li Liu,<sup>\*a</sup> Yi-Feng Dai,<sup>a</sup> Zhang-Biao Yu,<sup>a</sup> and Li-Jun Peng<sup>\*a</sup>

<sup>a</sup> National & Local Joint Engineering Research Center for the Exploitation of Homology Resources of Southwest Medicine and Food, Guizhou University, Guiyang, 550025, China.

<sup>b</sup> These three authors contributed equally to this work.

E-mail: ljpeng@gzu.edu.cn (L.-J. Peng) and xlliu1@gzu.edu.cn (X.-L. Liu)

## Table of Contents

|                                                                                                                |     |
|----------------------------------------------------------------------------------------------------------------|-----|
| Table of contents.....                                                                                         | S1  |
| 1. General experimental information.....                                                                       | S2  |
| 2. Synthesis of 3-vinyl benzofuranone-chromones <b>1</b> .....                                                 | S2  |
| 3. Characterization data of 3-vinyl benzofuranone-chromones <b>1</b> .....                                     | S2  |
| 4. Synthesis of <i>N</i> -H pyridones <b>3</b> by reaction of ammonia.....                                     | S3  |
| 5. Synthesis of <i>N</i> -H pyridones <b>3</b> by reaction of NH <sub>4</sub> OAc.....                         | S3  |
| 6. Characterization data of <i>N</i> -H benzoylpyridones <b>3</b> .....                                        | S4  |
| 7. Synthesis of <i>N</i> -alkyl pyridones <b>3</b> by reaction of primary amines <b>2</b> .....                | S6  |
| 8. Characterization data of <i>N</i> -alkyl pyridones <b>3</b> .....                                           | S6  |
| 9. Synthesis of chiral imidazoles <b>4</b> by reaction of 1,2-diphenylethylenediamine <b>2</b> .....           | S21 |
| 10. Characterization data of chiral imidazoles <b>4</b> .....                                                  | S21 |
| 11. Gram scale synthesis of the product <b>4a</b> .....                                                        | S25 |
| 12. Synthesis and application of chiral imidazole ester <b>5a</b> .....                                        | S26 |
| 13. Figure S1: new species detected by ESI-MS analysis.....                                                    | S27 |
| 14. X-ray crystal data for compounds <b>3ba</b> , <b>4c</b> and <b>4e</b> .....                                | S28 |
| 15. The copies of <sup>1</sup> H NMR and <sup>13</sup> C NMR spectra for compounds <b>3</b> and <b>4</b> ..... | S31 |

### 1. General information

Reactions were monitored by thin layer chromatography using UV light to visualize the course

of reaction. Purification of reaction products was carried out by flash chromatography on silica gel or just by simple filtration and washing.  $^1\text{H}$  and  $^{13}\text{C}$ NMR spectra were obtained using a Bruker DPX-400 spectrometer.  $^1\text{H}$  NMR chemical shifts are reported in ppm ( $\delta$ ) relative to tetramethylsilane (TMS) with the solvent resonance employed as the internal standard. Data are reported as follows: chemical shift, multiplicity (s = singlet, d = doublet, t = triplet, m = multiplet), coupling constants (Hz) and integration.  $^{13}\text{C}$  NMR chemical shifts are reported in ppm ( $\delta$ ) from tetramethylsilane (TMS) with the solvent resonance as the internal standard. Melting points were measured on an electrothermal digital melting point apparatus.

## 2. Synthesis of 3-vinyl benzofuranone-chromones 1

Chromone-3-carboxaldehyde (5.1 mmol) and piperidine (0.5 mmol) were added to a suspension of benzofuranone (5.0 mmol) in ethanol (20.0 mL). The solution was heated at 80 °C for 1.5 h. The reaction was allowed to cool to room temperature. The precipitate was filtered, washed with ethanol and dried to afford the product **1** as a light red solid.

## 3. Characterization data of 3-vinyl benzofuranone-chromones 1

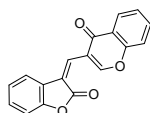

**(Z)-3-((2-oxobenzofuran-3(2H)-ylidene)methyl)-4H-chromen-4-one (1a)**: Light red solid, m.p. 270.3-270.5 °C; 1.31 g, yield 90%;  $^1\text{H}$  NMR ( $\text{CDCl}_3$ , 400 MHz)  $\delta$ : 7.04 (d,  $J = 8.0$  Hz, 1H), 7.11-7.15 (m, 1H), 7.26-7.30 (m, 1H), 7.39-7.43 (m, 1H), 7.47 (d,  $J = 8.0$  Hz, 1H), 7.56-7.58 (m, 1H), 7.65-7.69 (m, 1H), 8.03 (s, 1H), 8.22-8.25 (m, 1H), 9.91 (s, 1H);  $^{13}\text{C}$  NMR ( $\text{CDCl}_3$ , 100 MHz)  $\delta$ : 108.6, 116.0, 116.3, 118.0, 119.1, 121.5, 121.9, 122.8, 123.8, 124.3, 127.1, 128.0, 132.2, 150.7, 153.8, 158.5, 164.9, 173.4; HRMS (ESI-TOF)  $m/z$ : Calcd. for  $\text{C}_{18}\text{H}_{10}\text{NaO}_4$   $[\text{M}+\text{Na}]^+$ : 313.0471; Found: 313.0475.

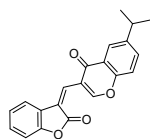

**(Z)-6-isopropyl-3-((2-oxobenzofuran-3(2H)-ylidene)methyl)-4H-chromen-4-one (1b)**: Light red solid, m.p. 255.7- 256.7 °C; 1.44 g, yield 87%;  $^1\text{H}$  NMR ( $\text{CDCl}_3$ , 400 MHz)  $\delta$ : 1.25 (d,  $J = 6.8$

Hz, 6H), 2.98-3.01 (m, 1H), 7.03 (d,  $J = 8.0$  Hz, 1H), 7.11-7.15 (m, 1H), 7.25-7.29 (m, 1H), 7.40 (d,  $J = 8.8$  Hz, 1H), 7.52-7.59 (m, 2H), 8.04 (s, 1H), 8.05 (d,  $J = 2.5$  Hz, 1H), 9.89 (s, 1H);  $^{13}\text{C}$  NMR ( $\text{CDCl}_3$ , 100 MHz)  $\delta$ : 22.9, 32.8, 109.8, 117.0, 117.4, 119.2, 120.0, 122.2, 122.4, 123.1, 128.6, 129.0, 132.3, 146.1, 151.8, 153.4, 159.6, 166.1, 174.8, one carbon missing in the aromatic region; HRMS (ESI-TOF)  $m/z$ : Calcd. for  $\text{C}_{21}\text{H}_{16}\text{NaO}_4$   $[\text{M}+\text{Na}]^+$ : 355.0941; Found: 355.0937.

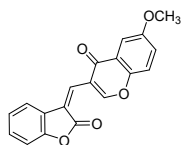

**(Z)-6-methoxy-3-((2-oxobenzofuran-3(2H)-ylidene)methyl)-4H-chromen-4-one (1c):** Light red solid, m.p. 263.7-264.2 °C; 1.33 g, yield 83%;  $^1\text{H}$  NMR ( $\text{CDCl}_3$ , 400 MHz)  $\delta$ : 3.86 (s, 3H), 7.03 (d,  $J = 8.4$  Hz, 1H), 7.11-7.15 (m, 1H), 7.22-7.30 (m, 2H), 7.41 (d,  $J = 9.2$  Hz, 1H), 7.57-7.59 (m, 2H), 8.04 (s, 1H), 9.88 (s, 1H);  $^{13}\text{C}$  NMR ( $\text{CDCl}_3$ , 100 MHz)  $\delta$ : 56.0, 105.6, 110.8, 117.4, 120.0, 120.2, 121.1, 124.1, 124.3, 124.4, 125.1, 129.6, 130.1, 150.8, 152.9, 157.6, 160.4, 167.2, 175.5; HRMS (ESI-TOF)  $m/z$ : Calcd. for  $\text{C}_{19}\text{H}_{12}\text{NaO}_5$   $[\text{M}+\text{Na}]^+$ : 343.0577; Found: 343.0574.

#### 4. Synthesis of *N*-H pyridones **3** by reaction of ammonia

In a sealed tube equipped with a magnetic stirring bar, to 1.5 mL of  $\text{NH}_3 \cdot \text{H}_2\text{O}$  (25%) was added 3-vinyl benzofuranone-chromone **1** (0.30 mmol). The reaction mixture was stirred at rt for 5 h. After completion of the reaction, as indicated by TLC, purification by flash column chromatography (hexane/EtOAc, 5/1, v/v) was carried out to furnish the *N*-H 2-hydroxy benzoylpyridones **3**.

#### 5. Synthesis of *N*-H pyridones **3** by reaction of $\text{NH}_4\text{OAc}$

In a sealed tube equipped with a magnetic stirring bar, to 1.5 mL of EtOH was added 3-vinyl benzofuranone-chromone **1** (0.30 mmol) and  $\text{NH}_4\text{OAc}$  (0.60 mmol). The reaction mixture was stirred at rt for 3 h. After completion of the reaction, as indicated by TLC, purification by flash column chromatography (hexane/EtOAc, 5/1, v/v) was carried out to furnish the *N*-H 2-hydroxy benzoylpyridones **3**.

#### 6. Characterization data of *N*-H pyridones **3**

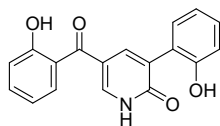

**5-(2-hydroxybenzoyl)-3-(2-hydroxyphenyl)pyridin-2(1H)-one (3aa):** Light yellow solid, m.p. 102.7-102.9 °C; 83.8 mg, yield 91% (82.9 mg, 90% for NH<sub>4</sub>OAc); <sup>1</sup>H NMR (DMSO-*d*<sub>6</sub>, 400 MHz)  $\delta$ : 6.84-6.99 (m, 4H), 7.18-7.22 (m, 1H), 7.29-7.42 (m, 3H), 7.75 (s, 1H), 7.93-7.95 (m, 1H), 9.54 (br s, 1H), 10.23 (br s, 1H), 12.43 (br s, 1H); <sup>13</sup>C NMR (DMSO-*d*<sub>6</sub>, 100 MHz)  $\delta$ : 117.0, 117.7, 119.5, 119.7, 123.8, 125.6, 129.0, 129.7, 130.2, 131.2, 133.0, 139.1, 141.6, 155.6, 155.9, 162.3, 192.1, one carbon missing in the aromatic region; HRMS (ESI-TOF) *m/z*: Calcd. for C<sub>18</sub>H<sub>13</sub>NNaO<sub>4</sub> [M+Na]<sup>+</sup>: 330.0737; Found: 330.0742.

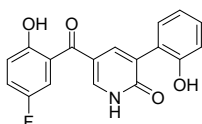

**5-(5-fluoro-2-hydroxybenzoyl)-3-(2-hydroxyphenyl)pyridin-2(1H)-one (3ab):** Light yellow solid, m.p. 100.8-101.2 °C; 86.7 mg, yield 89% (86.8 mg, 90% for NH<sub>4</sub>OAc); <sup>1</sup>H NMR (DMSO-*d*<sub>6</sub>, 400 MHz)  $\delta$ : 6.87-7.02 (m, 3H), 7.20-7.34 (m, 4H), 7.81 (d, *J* = 2.4 Hz, 1H), 7.97 (s, 1H), 9.56 (br s, 1H), 10.15 (br s, 1H), 12.47 (br s, 1H); <sup>13</sup>C NMR (DMSO-*d*<sub>6</sub>, 100 MHz)  $\delta$ : 115.9 (d, *J*<sub>CF</sub> = 24.3 Hz), 116.9, 117.3, 118.1 (d, *J*<sub>CF</sub> = 7.3 Hz), 119.2 (d, *J*<sub>CF</sub> = 23.1 Hz), 119.5, 123.7, 126.6 (d, *J*<sub>CF</sub> = 6.3 Hz), 129.1, 129.7, 131.2, 138.7, 142.1, 151.8, 155.4 (d, *J*<sub>CF</sub> = 235.5 Hz), 155.5, 162.3, 190.5; <sup>19</sup>F NMR (CDCl<sub>3</sub>, 470 MHz)  $\delta$ : -122.26; HRMS (ESI-TOF) *m/z*: Calcd. for C<sub>18</sub>H<sub>12</sub>FNNaO<sub>4</sub> [M+Na]<sup>+</sup>: 348.0643; Found: 348.0641.

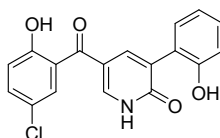

**5-(5-chloro-2-hydroxybenzoyl)-3-(2-hydroxyphenyl)pyridin-2(1H)-one (3ac):** Light yellow solid, m.p. 103.2-104.4 °C; 94.1 mg, yield 92% (93.1 mg, 91% for NH<sub>4</sub>OAc); <sup>1</sup>H NMR (DMSO-*d*<sub>6</sub>, 400 MHz)  $\delta$ : 6.89-6.96 (m, 2H), 7.03 (d, *J* = 8.8 Hz, 1H), 7.23-7.27 (m, 1H), 7.33-7.35 (m, 1H), 7.40 (d, *J* = 2.8 Hz, 1H), 7.45-7.48 (m, 1H), 7.81 (d, *J* = 2.4 Hz, 1H), 7.97 (d, *J* = 2.4 Hz, 1H), 9.55 (br s, 1H), 10.43 (br s, 1H), 12.46 (br s, 1H); <sup>13</sup>C NMR (DMSO-*d*<sub>6</sub>, 100 MHz)  $\delta$ : 116.9, 117.2, 118.7, 119.4, 123.3, 123.7, 127.7, 129.1, 129.2, 129.7, 131.2, 132.1, 138.6, 142.1, 154.3, 155.5,



162.3, 190.2; HRMS (ESI-TOF)  $m/z$ : Calcd. for  $C_{18}H_{12}ClNNaO_4$   $[M+Na]^+$ : 364.0347; Found: 364.0349.

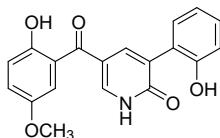

**5-(2-hydroxy-5-methoxybenzoyl)-3-(2-hydroxyphenyl)pyridin-2(1H)-one (3ad):** Light yellow solid, m.p. 82.5-83.4 °C; 92.0 mg, yield 91% (93.0 mg, 92% for  $NH_4OAc$ );  $^1H$  NMR ( $DMSO-d_6$ , 400 MHz)  $\delta$ : 3.71 (s, 3H), 6.84-6.91 (m, 4H), 6.98-7.01 (m, 1H), 7.18-7.22 (m, 1H), 7.28-7.30 (m, 1H), 7.76 (d,  $J = 2.4$  Hz, 1H), 7.94 (d,  $J = 2.8$  Hz, 1H), 9.53 (br s, 1H), 9.68 (br s, 1H), 12.41 (br s, 1H);  $^{13}C$  NMR ( $DMSO-d_6$ , 100 MHz)  $\delta$ : 56.0, 114.0, 117.0, 117.6, 118.0, 119.1, 119.5, 123.8, 126.0, 129.0, 129.7, 131.2, 139.0, 141.8, 149.4, 152.5, 155.6, 162.3, 191.6; HRMS (ESI-TOF)  $m/z$ : Calcd. for  $C_{19}H_{15}NNaO_5$   $[M+Na]^+$ : 360.0842; Found: 360.0841.

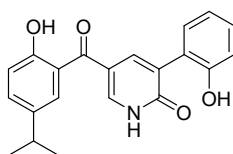

**5-(2-hydroxy-5-isopropylbenzoyl)-3-(2-hydroxyphenyl)pyridin-2(1H)-one (3ae):** Light yellow solid, m.p. 123.2-124.3 °C; 92.1 mg, yield 88% (89.0 mg, 85% for  $NH_4OAc$ );  $^1H$  NMR ( $DMSO-d_6$ , 400 MHz)  $\delta$ : 1.17 (d,  $J = 7.2$  Hz, 6H), 2.81-2.88 (m, 1H), 6.84-6.93 (m, 3H), 7.18-7.22 (m, 2H), 7.26-7.31 (m, 2H), 7.78 (d,  $J = 2.4$  Hz, 1H), 7.97 (d,  $J = 2.4$  Hz, 1H), 9.56 (br s, 1H), 10.04 (br s, 1H), 12.44 (br s, 1H);  $^{13}C$  NMR ( $DMSO-d_6$ , 100 MHz)  $\delta$ : 24.4, 32.9, 117.0, 117.1, 117.8, 119.6, 123.9, 125.1, 127.7, 129.0, 129.7, 131.0, 131.2, 139.3, 139.6, 141.6, 154.1, 155.6, 162.4, 192.3; HRMS (ESI-TOF)  $m/z$ : Calcd. for  $C_{21}H_{19}NNaO_4$   $[M+Na]^+$ : 372.1206; Found: 372.1211.

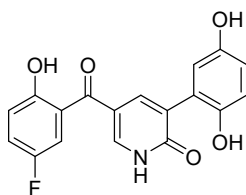

**3-(2,5-dihydroxyphenyl)-5-(5-fluoro-2-hydroxybenzoyl)pyridin-2(1H)-one (3af):** Light yellow solid, m.p. 100.3-101.1 °C; 92.1 mg, yield 90% (93.1 mg, 91% for  $NH_4OAc$ );  $^1H$  NMR

(DMSO-*d*<sub>6</sub>, 400 MHz)  $\delta$ : 6.67-6.70 (m, 1H), 6.75-6.80 (m, 2H), 7.00-7.03 (m, 1H), 7.21-7.31 (m, 2H), 7.82 (s, 1H), 7.98 (s, 1H), 8.84 (d, *J* = 7.6 Hz, 2H), 10.14 (br s, 1H), 12.52 (br s, 1H); <sup>13</sup>C NMR (DMSO-*d*<sub>6</sub>, 100 MHz)  $\delta$ : 115.9 (d, *J*<sub>CF</sub> = 24.4 Hz), 116.5, 117.2, 117.4, 117.9, 118.2, 119.2 (d, *J*<sub>CF</sub> = 23.0 Hz), 124.0, 126.6 (d, *J*<sub>CF</sub> = 6.1 Hz), 129.0, 138.9, 141.9, 148.0, 150.3, 151.8, 155.6 (d, *J*<sub>CF</sub> = 234.4 Hz), 162.4, 190.5; <sup>19</sup>F NMR (CDCl<sub>3</sub>, 470 MHz)  $\delta$ : -125.05; HRMS (ESI-TOF) *m/z*: Calcd. for C<sub>18</sub>H<sub>12</sub>FNNaO<sub>5</sub> [M+Na]<sup>+</sup>: 364.0592; Found: 364.0592.

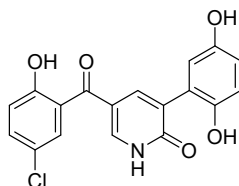

**5-(5-chloro-2-hydroxybenzoyl)-3-(2,5-dihydroxyphenyl)pyridin-2(1H)-one (3ag):** Light yellow solid, m.p. 120.7-120.9 °C; 98.5 mg, yield 92% (96.4 mg, 90% for NH<sub>4</sub>OAc); <sup>1</sup>H NMR (DMSO-*d*<sub>6</sub>, 400 MHz)  $\delta$ : 6.62-6.65 (m, 1H), 6.72 (d, *J* = 8.0 Hz, 2H), 6.98 (d, *J* = 8.8 Hz, 1H), 7.36 (d, *J* = 2.4 Hz, 1H), 7.41 (d, *J* = 8.8 Hz, 1H), 7.77 (s, 1H), 7.93 (s, 1H), 8.79 (d, *J* = 7.2 Hz, 2H), 10.38 (br s, 1H), 12.48 (br s, 1H); <sup>13</sup>C NMR (DMSO-*d*<sub>6</sub>, 100 MHz)  $\delta$ : 116.6, 117.2, 117.5, 117.9, 118.7, 123.3, 124.0, 127.7, 129.0, 129.2, 132.2, 138.9, 142.0, 148.0, 150.3, 154.3, 162.4, 190.3; HRMS (ESI-TOF) *m/z*: Calcd. for C<sub>18</sub>H<sub>12</sub>ClNNaO<sub>5</sub> [M+Na]<sup>+</sup>: 380.0296; Found: 380.0291.

## 7. Synthesis of *N*-alkyl pyridones **3** by reaction of and primary amines **2**

In a sealed tube equipped with a magnetic stirring bar, to 1.5 mL of EtOH was added 3-vinyl benzofuranone-chromone **1** (0.30 mmol) and primary amine **2** (0.60 mmol). The reaction mixture was stirred at rt for 5 h. After completion of the reaction, as indicated by TLC, purification by flash column chromatography (hexane/EtOAc, 5/1, v/v) was carried out to furnish the *N*-alkyl 2-hydroxy benzoylpyridones **3**.

## 8. Characterization data of *N*-alkyl pyridones **3**

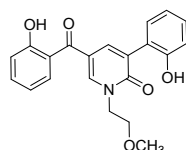

**5-(2-hydroxybenzoyl)-3-(2-hydroxyphenyl)-1-(2-methoxyethyl)pyridin-2(1H)-one (3ba):**

Light yellow solid, m.p. 120.7-121.8 °C; 99.6 mg, yield 91%; <sup>1</sup>H NMR (DMSO-*d*<sub>6</sub>, 400 MHz) δ: 3.26 (s, 3H), 3.61-3.64 (m, 2H), 4.23-4.25 (m, 2H), 6.83-6.87 (m, 1H), 6.91-6.97 (m, 2H), 7.00 (d, *J* = 8.0 Hz, 1H), 7.17-7.22 (m, 1H), 7.27-7.30 (m, 1H), 7.38-7.44 (m, 2H), 7.87 (d, *J* = 2.4 Hz, 1H), 8.20 (d, *J* = 2.4 Hz, 1H), 9.43 (br s, 1H), 10.30 (br s, 1H); <sup>13</sup>C NMR (DMSO-*d*<sub>6</sub>, 100 MHz) δ: 49.7, 58.5, 69.7, 116.7, 116.8, 117.1, 119.4, 119.6, 124.0, 125.1, 128.0, 129.6, 130.4, 131.4, 133.2, 138.7, 145.7, 155.4, 156.6, 161.3, 192.5; HRMS (ESI-TOF) *m/z*: Calcd. for C<sub>21</sub>H<sub>19</sub>NNaO<sub>5</sub> [M+Na]<sup>+</sup>: 388.1155; Found: 388.1152.

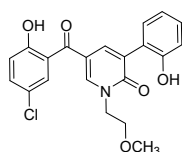

**5-(5-chloro-2-hydroxybenzoyl)-3-(2-hydroxyphenyl)-1-(2-methoxyethyl)pyridin-2(1H)-one(3bb):** Light yellow solid, m.p. 100.6-101.2 °C; 104.1 mg, yield 87%; <sup>1</sup>H NMR (DMSO-*d*<sub>6</sub>, 400 MHz) δ: 3.26 (s, 3H), 3.60-3.63 (m, 2H), 4.22-4.25 (m, 2H), 6.83-6.86 (m, 1H), 6.90-6.92 (m, 1H), 7.00 (d, *J* = 8.8 Hz, 1H), 7.17-7.21 (m, 1H), 7.26-7.28 (m, 1H), 7.34 (d, *J* = 2.8 Hz, 1H), 7.41-7.44 (m, 1H), 7.85 (d, *J* = 2.8 Hz, 1H), 8.19 (d, *J* = 2.8 Hz, 1H), 9.41 (br s, 1H), 10.39 (br s, 1H); <sup>13</sup>C NMR (DMSO-*d*<sub>6</sub>, 100 MHz) δ: 49.6, 58.5, 69.6, 116.4, 116.6, 118.8, 119.3, 123.2, 123.9, 127.4, 128.1, 129.2, 129.6, 131.4, 132.2, 138.2, 146.2, 154.8, 155.4, 161.2, 190.5; HRMS (ESI-TOF) *m/z*: Calcd. for C<sub>21</sub>H<sub>18</sub>ClNNaO<sub>5</sub> [M+Na]<sup>+</sup>: 422.0766; Found: 422.0768.

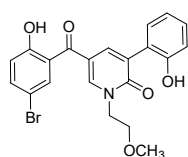

**5-(5-bromo-2-hydroxybenzoyl)-3-(2-hydroxyphenyl)-1-(2-methoxyethyl)pyridin-2(1H)-one(3bc):** Light yellow solid, m.p. 134.8-135.4 °C; 118.3 mg, yield 89%; <sup>1</sup>H NMR (DMSO-*d*<sub>6</sub>, 400 MHz) δ: 3.27 (s, 3H), 3.60-3.63 (m, 2H), 4.22-4.24 (m, 2H), 6.83-6.87 (m, 1H), 6.90-6.92 (m, 1H), 6.96 (d, *J* = 8.8 Hz, 1H), 7.17-7.21 (m, 1H), 7.26-7.29 (m, 1H), 7.46 (d, *J* = 2.4 Hz, 1H), 7.52-7.55 (m, 1H), 7.85 (d, *J* = 2.8 Hz, 1H), 8.18 (d, *J* = 2.4 Hz, 1H), 9.41 (br s, 1H), 10.42 (br s, 1H); <sup>13</sup>C NMR (DMSO-*d*<sub>6</sub>, 100 MHz) δ: 49.6, 58.5, 69.6, 110.6, 116.5, 116.7, 119.3, 119.4, 123.9, 128.0, 128.1, 129.6, 131.4, 132.0, 135.1, 138.2, 146.2, 155.2, 155.4, 161.3, 190.4; HRMS (ESI-TOF) *m/z*: Calcd. for C<sub>21</sub>H<sub>18</sub>BrNNaO<sub>5</sub> [M+Na]<sup>+</sup>: 466.0261; Found: 466.0267.

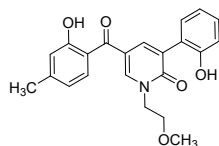

**5-(2-hydroxy-4-methylbenzoyl)-3-(2-hydroxyphenyl)-1-(2-methoxyethyl)pyridin-2(1H)-one (3bd):** Light yellow solid, m.p. 105.7-106.4 °C; 102.3 mg, yield 90%; <sup>1</sup>H NMR (DMSO-*d*<sub>6</sub>, 400 MHz)  $\delta$ : 2.31 (s, 3H), 3.28 (s, 3H), 3.62-3.64 (m, 2H), 4.23-4.26 (m, 2H), 6.77-6.92 (m, 4H), 7.17-7.21 (m, 1H), 7.27-7.29 (m, 1H), 7.35 (d, *J* = 7.6 Hz, 1H), 7.85 (d, *J* = 2.8 Hz, 1H), 8.20 (d, *J* = 2.4 Hz, 1H), 9.41 (br s, 1H), 10.47 (br s, 1H); <sup>13</sup>C NMR (DMSO-*d*<sub>6</sub>, 100 MHz)  $\delta$ : 21.7, 49.7, 58.6, 70.0, 116.7, 116.8, 117.6, 119.3, 120.6, 121.6, 124.0, 127.9, 129.6, 131.0, 131.4, 139.0, 144.4, 145.4, 155.4, 157.7, 161.2, 192.7; HRMS (ESI-TOF) *m/z*: Calcd. for C<sub>22</sub>H<sub>21</sub>NNaO<sub>5</sub> [M+Na]<sup>+</sup>: 402.1312; Found: 402.1317.

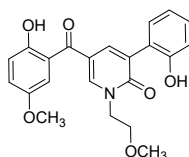

**5-(2-hydroxy-5-methoxybenzoyl)-3-(2-hydroxyphenyl)-1-(2-methoxyethyl)pyridin-2(1H)-one (3be):** Light yellow solid, m.p. 100.8-101.3 °C; 106.7 mg, yield 90%; <sup>1</sup>H NMR (DMSO-*d*<sub>6</sub>, 400 MHz)  $\delta$ : 3.25 (s, 3H), 3.61-3.63 (m, 2H), 3.73 (s, 3H), 4.22-4.25 (m, 2H), 6.83-6.86 (m, 1H), 6.90-6.93 (m, 3H), 7.00-7.03 (m, 1H), 7.17-7.21 (m, 1H), 7.26-7.28 (m, 1H), 7.85 (d, *J* = 2.4 Hz, 1H), 8.21 (d, *J* = 2.4 Hz, 1H), 9.41 (br s, 1H), 9.74 (br s, 1H); <sup>13</sup>C NMR (DMSO-*d*<sub>6</sub>, 100 MHz)  $\delta$ : 49.8, 56.0, 58.5, 69.7, 114.1, 116.7, 118.1, 119.3, 119.5, 124.0, 125.4, 127.9, 129.6, 131.4, 138.6, 145.8, 150.1, 152.4, 155.4, 161.3, 192.0, one carbon missing in the aromatic region; HRMS (ESI-TOF) *m/z*: Calcd. for C<sub>22</sub>H<sub>21</sub>NNaO<sub>6</sub> [M+Na]<sup>+</sup>: 418.1261; Found: 418.1265.

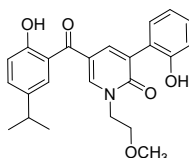

**5-(2-hydroxy-5-isopropylbenzoyl)-3-(2-hydroxyphenyl)-1-(2-methoxyethyl)pyridin-2(1H)-one (3bf):** Light yellow solid, m.p. 145.3-146.6 °C; 111.1 mg, yield 91%; <sup>1</sup>H NMR (DMSO-*d*<sub>6</sub>, 400 MHz)  $\delta$ : 1.19 (d, *J* = 6.8 Hz, 6H), 2.83-2.90 (m, 1H), 3.26 (s, 3H), 3.62-3.64 (m, 2H), 4.22-4.25 (m, 2H), 6.83-6.87 (m, 1H), 6.91-6.94 (m, 2H), 7.17-7.31 (m, 4H), 7.87 (d, *J* = 2.4 Hz, 1H),

8.19 (d,  $J = 2.4$  Hz, 1H), 9.41 (br s, 1H), 10.09 (br s, 1H);  $^{13}\text{C}$  NMR (DMSO- $d_6$ , 100 MHz)  $\delta$ : 24.4, 33.0, 49.9, 58.6, 69.7, 116.7, 116.9, 117.1, 119.3, 124.0, 124.6, 127.9, 128.0, 129.6, 131.3, 131.4, 138.8, 139.4, 145.7, 154.8, 155.5, 161.3, 192.6; HRMS (ESI-TOF)  $m/z$ : Calcd. for  $\text{C}_{24}\text{H}_{25}\text{NNaO}_5$   $[\text{M}+\text{Na}]^+$ : 430.1625; Found: 430.1627.

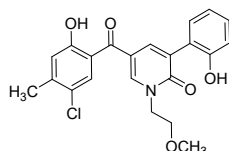

**5-(5-chloro-2-hydroxy-4-methylbenzoyl)-3-(2-hydroxyphenyl)-1-(2-methoxyethyl)pyridin-2(1H)-one (3bg)**: Light yellow solid, m.p. 130.2-131.1 °C; 115.2 mg, yield 93%;  $^1\text{H}$  NMR ( $\text{CDCl}_3$ , 400 MHz)  $\delta$ : 2.29 (s, 3H), 3.34 (s, 3H), 3.62-3.65 (m, 2H), 4.20-4.22 (m, 2H), 6.84 (s, 1H), 6.87 (d,  $J = 7.6$  Hz, 1H), 6.91 (d,  $J = 8.0$  Hz, 1H), 7.17-7.22 (m, 2H), 7.53 (s, 1H), 7.93 (d,  $J = 7.2$  Hz, 2H), 8.84 (s, 1H), 11.32 (s, 1H);  $^{13}\text{C}$  NMR ( $\text{CDCl}_3$ , 100 MHz)  $\delta$ : 20.9, 51.4, 59.2, 69.6, 117.7, 117.8, 119.7, 120.8, 121.0, 124.2, 124.5, 130.6, 130.8, 131.3, 131.4, 140.3, 143.1, 145.8, 156.0, 161.1, 162.6, 193.8; HRMS (ESI-TOF)  $m/z$ : Calcd. for  $\text{C}_{22}\text{H}_{20}\text{ClNNaO}_5$   $[\text{M}+\text{Na}]^+$ : 436.0922; Found: 436.0927.

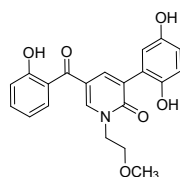

**3-(2,5-dihydroxyphenyl)-5-(2-hydroxybenzoyl)-1-(2-methoxyethyl)pyridin-2(1H)-one (3bh)**: Light yellow solid, m.p. 120.3-121.3 °C; 99.4 mg, yield 87%;  $^1\text{H}$  NMR (DMSO- $d_6$ , 400 MHz)  $\delta$ : 3.28 (s, 3H), 3.63-3.66 (m, 2H), 4.26-4.28 (m, 2H), 6.63-6.66 (m, 1H), 6.72-6.74 (m, 2H), 6.95-7.02 (m, 2H), 7.39-7.46 (m, 2H), 7.86 (d,  $J = 2.4$  Hz, 1H), 8.21 (d,  $J = 2.4$  Hz, 1H), 8.67 (br s, 1H), 8.80 (br s, 1H), 10.28 (br s, 1H);  $^{13}\text{C}$  NMR (DMSO- $d_6$ , 100 MHz)  $\delta$ : 49.8, 58.5, 69.6, 116.4, 116.9, 117.1, 117.4, 117.6, 119.6, 124.3, 125.1, 127.9, 130.4, 133.2, 138.9, 145.5, 147.8, 150.2, 156.5, 161.3, 192.5; HRMS (ESI-TOF)  $m/z$ : Calcd. for  $\text{C}_{21}\text{H}_{19}\text{NNaO}_6$   $[\text{M}+\text{Na}]^+$ : 404.1105; Found: 404.1109.

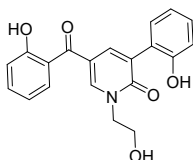

**5-(2-hydroxybenzoyl)-1-(2-hydroxyethyl)-3-(2-hydroxyphenyl)pyridin-2(1H)-one (3ca):**

Light yellow solid, m.p. 110.6-111.1 °C; 96.9 mg, yield 92%; <sup>1</sup>H NMR (DMSO-*d*<sub>6</sub>, 400 MHz) δ: 3.70 (s, 2H), 4.12-4.14 (m, 2H), 5.00 (s, 1H), 6.84-7.02 (m, 4H), 7.18-7.22 (m, 1H), 7.27-7.30 (m, 1H), 7.40-7.44 (m, 2H), 7.88 (s, 1H), 8.21 (d, *J* = 2.4 Hz, 1H), 9.42 (br s, 1H), 10.30 (br s, 1H); <sup>13</sup>C NMR (DMSO-*d*<sub>6</sub>, 100 MHz) δ: 53.2, 58.9, 116.6, 116.8, 117.2, 119.4, 119.6, 124.1, 125.2, 127.9, 129.6, 130.4, 131.4, 133.2, 138.9, 145.9, 155.5, 156.5, 161.4, 192.5; HRMS (ESI-TOF) *m/z*: Calcd. for C<sub>20</sub>H<sub>17</sub>NNaO<sub>5</sub> [M+Na]<sup>+</sup>: 374.0999; Found: 374.0992.

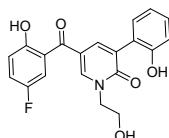

**5-(5-fluoro-2-hydroxybenzoyl)-1-(2-hydroxyethyl)-3-(2-hydroxyphenyl)pyridin-2(1H)-one (3cb):**

Light yellow solid, m.p. 110.8-110.8 °C; 100.7 mg, yield 91%; <sup>1</sup>H NMR (DMSO-*d*<sub>6</sub>, 400 MHz) δ: 3.66-3.68 (m, 2H), 4.10-4.12 (m, 2H), 4.97 (br s, 1H), 6.83-6.86 (m, 1H), 6.90 (d, *J* = 8.4 Hz, 1H), 6.96-6.99 (m, 1H), 7.16-7.27 (m, 4H), 7.84 (d, *J* = 5.2 Hz, 1H), 8.20 (d, *J* = 2.4 Hz, 1H), 9.41 (br s, 1H), 10.10 (br s, 1H); <sup>13</sup>C NMR (DMSO-*d*<sub>6</sub>, 100 MHz) δ: 53.1, 58.9, 115.9 (d, *J*<sub>CF</sub> = 24.3 Hz), 116.2, 116.7, 118.3 (d, *J*<sub>CF</sub> = 8.2 Hz), 119.2 (d, *J*<sub>CF</sub> = 23.3 Hz), 119.4, 124.0, 126.4, 127.9, 129.6, 131.4, 138.4, 146.3, 152.2, 155.3 (d, *J*<sub>CF</sub> = 235.4 Hz), 155.4, 161.3, 190.8; <sup>19</sup>F NMR (CDCl<sub>3</sub>, 470 MHz) δ: -123.03; HRMS (ESI-TOF) *m/z*: Calcd. for C<sub>20</sub>H<sub>16</sub>FNNaO<sub>5</sub> [M+Na]<sup>+</sup>: 392.0905; Found: 392.0907.

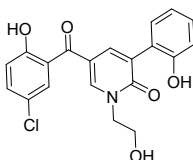

**5-(5-chloro-2-hydroxybenzoyl)-1-(2-hydroxyethyl)-3-(2-hydroxyphenyl)pyridin-2(1H)-one (3cc):**

Light yellow solid, m.p. 98.7-99.9 °C; 104.9 mg, yield 90%; <sup>1</sup>H NMR (DMSO-*d*<sub>6</sub>, 400 MHz) δ: 3.68 (s, 2H), 4.11-4.13 (m, 2H), 4.97 (s, 1H), 6.83-6.87 (m, 1H), 6.91 (d, *J* = 8.0 Hz, 1H), 7.01 (d, *J* = 8.8 Hz, 1H), 7.17-7.21 (m, 1H), 7.26-7.28 (m, 1H), 7.36 (d, *J* = 2.8 Hz, 1H),

7.40-7.43 (m, 1H), 7.85 (d,  $J = 2.8$  Hz, 1H), 8.21 (d,  $J = 2.4$  Hz, 1H), 9.40 (br s, 1H), 10.40 (br s, 1H);  $^{13}\text{C}$  NMR (DMSO- $d_6$ , 100 MHz)  $\delta$ : 53.1, 58.9, 116.3, 116.7, 118.8, 119.4, 123.3, 124.0, 127.5, 128.0, 129.2, 129.6, 131.4, 132.2, 138.4, 146.4, 154.7, 155.4, 161.4, 190.6; HRMS (ESI-TOF)  $m/z$ : Calcd. for  $\text{C}_{20}\text{H}_{16}\text{ClNNaO}_5$   $[\text{M}+\text{Na}]^+$ : 408.0609; Found: 408.0614.

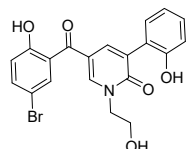

**5-(5-bromo-2-hydroxybenzoyl)-1-(2-hydroxyethyl)-3-(2-hydroxyphenyl)pyridin-2(1H)-one(3cd)**: Light yellow solid, m.p. 128.5-129.2 °C; 114.9 mg, yield 89%;  $^1\text{H}$  NMR (DMSO- $d_6$ , 400 MHz)  $\delta$ : 3.66 (s, 2H), 4.09-4.12 (m, 2H), 4.96 (br s, 1H), 6.82-6.95 (m, 3H), 7.17-7.21 (m, 1H), 7.25-7.27 (m, 1H), 7.46 (s, 1H), 7.53 (d,  $J = 8.8$  Hz, 1H), 7.82 (d,  $J = 2.8$  Hz, 1H), 8.19 (d,  $J = 2.8$  Hz, 1H), 9.39 (br s, 1H), 10.40 (br s, 1H);  $^{13}\text{C}$  NMR (DMSO- $d_6$ , 100 MHz)  $\delta$ : 53.1, 58.9, 110.7, 116.3, 116.7, 119.3, 119.4, 124.0, 127.9, 128.1, 129.6, 131.4, 132.0, 135.1, 138.3, 146.4, 155.1, 155.4, 161.3, 190.5; HRMS (ESI-TOF)  $m/z$ : Calcd. for  $\text{C}_{20}\text{H}_{16}\text{BrNNaO}_5$   $[\text{M}+\text{Na}]^+$ : 452.0104; Found: 452.0110.

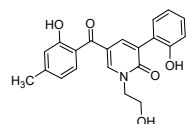

**5-(2-hydroxy-4-methylbenzoyl)-1-(2-hydroxyethyl)-3-(2-hydroxyphenyl)pyridin-2(1H)-one(3ce)**: Light yellow solid, m.p. 87.3-88.4 °C; 99.6 mg, yield 91%;  $^1\text{H}$  NMR (DMSO- $d_6$ , 400 MHz)  $\delta$ : 2.31 (s, 3H), 3.69 (s, 2H), 4.11-4.14 (m, 2H), 5.00 (br s, 1H), 6.76-6.91 (m, 4H), 7.17-7.21 (m, 1H), 7.27-7.29 (m, 1H), 7.37 (d,  $J = 8.0$  Hz, 1H), 7.85 (d,  $J = 2.8$  Hz, 1H), 8.20 (d,  $J = 2.4$  Hz, 1H), 9.42 (br s, 1H), 10.47 (br s, 1H);  $^{13}\text{C}$  NMR (DMSO- $d_6$ , 100 MHz)  $\delta$ : 21.7, 53.2, 58.9, 116.6, 116.8, 117.7, 119.4, 120.6, 121.6, 124.1, 127.8, 129.6, 131.0, 131.4, 139.1, 144.4, 145.7, 155.5, 157.6, 161.3, 192.7; HRMS (ESI-TOF)  $m/z$ : Calcd. for  $\text{C}_{21}\text{H}_{19}\text{NNaO}_5$   $[\text{M}+\text{Na}]^+$ : 388.1155; Found: 388.1159.

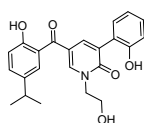

**5-(2-hydroxy-5-isopropylbenzoyl)-1-(2-hydroxyethyl)-3-(2-hydroxyphenyl)pyridin-2(1H)-**

**one (3cf):** Light yellow solid, m.p. 100.2-101.1 °C; 106.1 mg, yield 90%; <sup>1</sup>H NMR (DMSO-*d*<sub>6</sub>, 400 MHz) δ: 1.18-1.20 (m, 6H), 2.50-2.51 (m, 1H), 3.70 (s, 2H), 4.12-4.14 (m, 2H), 5.01 (br s, 1H), 6.84-6.88 (m, 1H), 6.90-6.94 (m, 2H), 7.18-7.22 (m, 1H), 7.27-7.32 (m, 3H), 7.88 (d, *J* = 2.4 Hz, 1H), 8.21 (d, *J* = 2.4 Hz, 1H), 9.41 (br s, 1H), 10.14 (br s, 1H); <sup>13</sup>C NMR (DMSO-*d*<sub>6</sub>, 100 MHz) δ: 24.4, 32.9, 53.2, 59.0, 116.6, 116.8, 117.2, 119.4, 124.2, 124.4, 128.0, 128.1, 129.6, 131.4, 131.5, 139.0, 139.4, 146.0, 154.9, 155.5, 161.4, 192.7; HRMS (ESI-TOF) *m/z*: Calcd. for C<sub>23</sub>H<sub>23</sub>NNaO<sub>5</sub> [M+Na]<sup>+</sup>: 416.1468; Found: 416.1473.

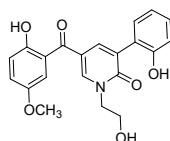

**5-(2-hydroxy-5-methoxybenzoyl)-1-(2-hydroxyethyl)-3-(2-hydroxyphenyl)pyridin-2(1H)-one (3cg):** Light yellow solid, m.p. 98.6-98.6 °C; 101.7 mg, yield 89%; <sup>1</sup>H NMR (DMSO-*d*<sub>6</sub>, 400 MHz) δ: 3.68-3.71 (m, 2H), 3.73 (s, 3H), 4.11-4.14 (m, 2H), 5.01 (br s, 1H), 6.84-6.88 (m, 1H), 6.91-6.94 (m, 3H), 7.01-7.04 (m, 1H), 7.18-7.22 (m, 1H), 7.27-7.29 (m, 1H), 7.88 (d, *J* = 2.8 Hz, 1H), 8.23 (d, *J* = 2.4 Hz, 1H), 9.49 (br s, 1H), 9.75 (br s, 1H); <sup>13</sup>C NMR (DMSO-*d*<sub>6</sub>, 100 MHz) δ: 53.2, 55.9, 58.9, 113.9, 116.5, 116.8, 118.3, 119.4, 119.9, 124.1, 125.1, 127.9, 129.6, 131.4, 138.8, 146.1, 150.4, 152.3, 155.5, 161.4, 192.1; HRMS (ESI-TOF) *m/z*: Calcd. for C<sub>21</sub>H<sub>19</sub>NNaO<sub>6</sub> [M+Na]<sup>+</sup>: 404.1105; Found: 404.1108.

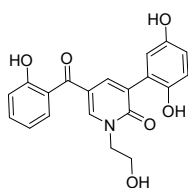

**3-(2,5-dihydroxyphenyl)-5-(2-hydroxybenzoyl)-1-(2-hydroxyethyl)pyridin-2(1H)-one (3ch):** Light yellow solid, m.p. 85.6-86.4 °C; 100.0 mg, yield 89%; <sup>1</sup>H NMR (DMSO-*d*<sub>6</sub>, 400 MHz) δ: 3.72 (d, *J* = 4.0 Hz, 2H), 4.15-4.18 (m, 2H), 5.02 (s, 1H), 6.65-6.68 (m, 1H), 6.74-6.76 (m, 2H), 6.97-7.04 (m, 2H), 7.43-7.48 (m, 2H), 7.89 (d, *J* = 2.8 Hz, 1H), 8.24 (d, *J* = 2.4 Hz, 1H), 8.68 (br s, 1H), 8.83 (br s, 1H), 10.31 (br s, 1H); <sup>13</sup>C NMR (DMSO-*d*<sub>6</sub>, 100 MHz) δ: 53.3, 58.9, 116.4, 116.8, 117.2, 117.4, 117.7, 119.6, 124.4, 125.1, 127.8, 130.4, 133.2, 139.0, 145.7, 147.9, 150.2, 156.5, 161.4, 192.5; HRMS (ESI-TOF) *m/z*: Calcd. for C<sub>20</sub>H<sub>17</sub>NNaO<sub>6</sub> [M+Na]<sup>+</sup>: 390.0948; Found:



390.0951.

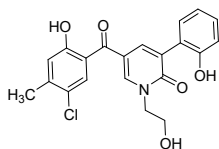

**5-(5-chloro-2-hydroxy-4-methylbenzoyl)-1-(2-hydroxyethyl)-3-(2-hydroxyphenyl)pyridin-2(1H)-one (3ci):** Light yellow solid, m.p. 100.7-101.2 °C; 110.1 mg, yield 92%; <sup>1</sup>H NMR (DMSO-*d*<sub>6</sub>, 400 MHz)  $\delta$ : 2.32 (s, 3H), 3.68 (s, 2H), 4.11-4.13 (m, 2H), 4.97 (br s, 1H), 6.83-6.87 (m, 1H), 6.90 (d, *J* = 8.0 Hz, 1H), 6.95 (s, 1H), 7.17-7.21 (m, 1H), 7.26-7.28 (m, 1H), 7.38 (s, 1H), 7.84 (d, *J* = 2.8 Hz, 1H), 8.22 (d, *J* = 2.4 Hz, 1H), 9.40 (br s, 1H), 10.38 (br s, 1H); <sup>13</sup>C NMR (DMSO-*d*<sub>6</sub>, 100 MHz)  $\delta$ : 20.4, 53.1, 58.9, 116.4, 116.8, 119.4, 119.6, 123.7, 124.0, 124.8, 127.9, 129.6, 130.0, 131.4, 138.6, 140.5, 146.2, 155.1, 155.4, 161.3, 190.7; HRMS (ESI-TOF) *m/z*: Calcd. for C<sub>21</sub>H<sub>18</sub>ClNNaO<sub>5</sub> [M+Na]<sup>+</sup>: 422.0766; Found: 422.0761.

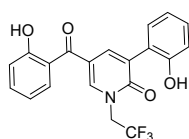

**5-(2-hydroxybenzoyl)-3-(2-hydroxyphenyl)-1-(2,2,2-trifluoroethyl)pyridin-2(1H)-one (3da):** Light yellow solid, m.p. 97.2-97.6 °C; 107.4 mg, yield 92%; <sup>1</sup>H NMR (CDCl<sub>3</sub>, 400 MHz)  $\delta$ : 4.70-4.76 (m, 2H), 6.84-6.96 (m, 3H), 7.00 (d, *J* = 8.4 Hz, 1H), 7.15-7.17 (m, 1H), 7.23-7.27 (m, 1H), 7.44-7.50 (m, 2H), 7.87 (s, 1H), 7.94 (d, *J* = 2.4 Hz, 1H), 8.22 (br s, 1H), 11.28 (br s, 1H); <sup>13</sup>C NMR (CDCl<sub>3</sub>, 100 MHz)  $\delta$ : 49.5 (q, *J*<sub>C,F</sub> = 35.3 Hz), 118.5, 119.0, 119.4, 119.8, 119.9, 121.3, 123.7, 124.6 (q, *J*<sub>C,F</sub> = 270.4 Hz), 130.8, 131.0, 131.7, 131.9, 137.0, 140.8, 141.0, 155.8, 162.3, 162.8, 194.7; <sup>19</sup>F NMR (CDCl<sub>3</sub>, 470 MHz)  $\delta$ : -70.20; HRMS (ESI-TOF) *m/z*: Calcd. for C<sub>20</sub>H<sub>14</sub>F<sub>3</sub>NNaO<sub>4</sub> [M+Na]<sup>+</sup>: 412.0767; Found: 412.0762.

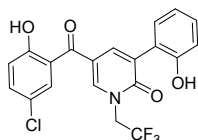

**5-(5-chloro-2-hydroxybenzoyl)-3-(2-hydroxyphenyl)-1-(2,2,2-trifluoroethyl)pyridin-2(1H)-one (3db):** Light yellow solid, m.p. 92.3-92.9 °C; 112.9 mg, yield 89%; <sup>1</sup>H NMR (CDCl<sub>3</sub>, 400 MHz)  $\delta$ : 4.74-4.80 (m, 2H), 6.91-7.00 (m, 3H), 7.17-7.20 (m, 1H), 7.25-7.29 (m, 1H), 7.41-7.44

(m, 1H), 7.50 (s, 1H), 7.89 (s, 1H), 7.95 (d,  $J = 2.4$  Hz, 1H), 8.10 (br s, 1H), 11.13 (br s, 1H);  $^{13}\text{C}$  NMR ( $\text{CDCl}_3$ , 100 MHz)  $\delta$ : 48.1 (q,  $J_{\text{C,F}} = 34.2$  Hz), 118.1, 118.8, 119.6, 120.3, 122.5, 123.1, 123.4, 124.5 (q,  $J_{\text{C,F}} = 270.7$  Hz), 129.6, 129.8, 130.1, 131.3, 135.7, 139.4, 139.9, 154.7, 160.1, 161.2, 192.6;  $^{19}\text{F}$  NMR ( $\text{CDCl}_3$ , 470 MHz)  $\delta$ : -70.23; HRMS (ESI-TOF)  $m/z$ : Calcd. for  $\text{C}_{20}\text{H}_{13}\text{ClF}_3\text{NNaO}_4$   $[\text{M}+\text{Na}]^+$ : 446.0377; Found: 446.0379.

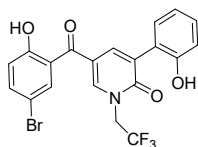

**5-(5-bromo-2-hydroxybenzoyl)-3-(2-hydroxyphenyl)-1-(2,2,2-trifluoroethyl)pyridin-2(1H)-one (3dc)**: Light yellow solid, m.p. 78.9-79.4 °C; 126.1 mg, yield 90%;  $^1\text{H}$  NMR ( $\text{CDCl}_3$ , 400 MHz)  $\delta$ : 4.71-4.78 (m, 2H), 6.89-6.94 (m, 3H), 7.16-7.18 (m, 1H), 7.23-7.27 (m, 1H), 7.52-7.55 (m, 1H), 7.63 (d,  $J = 2.4$  Hz, 1H), 7.87 (s, 1H), 7.92 (s, 1H), 8.09 (br s, 1H), 11.13 (br s, 1H);  $^{13}\text{C}$  NMR ( $\text{CDCl}_3$ , 100 MHz)  $\delta$ : 49.1 (q,  $J_{\text{C,F}} = 33.7$  Hz), 110.9, 119.1, 119.7, 119.8, 120.9, 121.4, 123.5, 124.2 (q,  $J_{\text{C,F}} = 270.1$  Hz), 130.9, 131.1, 133.7, 139.5, 140.5, 155.6, 161.5, 162.2, 193.5, two carbons missing in the aromatic region;  $^{19}\text{F}$  NMR ( $\text{CDCl}_3$ , 470 MHz)  $\delta$ : -70.22; HRMS (ESI-TOF)  $m/z$ : Calcd. for  $\text{C}_{20}\text{H}_{13}\text{BrF}_3\text{NNaO}_4$   $[\text{M}+\text{Na}]^+$ : 489.9872; Found: 489.9874.

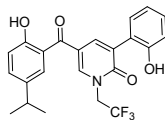

**5-(2-hydroxy-5-isopropylbenzoyl)-3-(2-hydroxyphenyl)-1-(2,2,2-trifluoroethyl)pyridin-2(1H)-one (3dd)**: Light yellow solid, m.p. 100.2-101.1 °C; 112.5 mg, yield 87%;  $^1\text{H}$  NMR ( $\text{DMSO}-d_6$ , 400 MHz)  $\delta$ : 1.19 (d,  $J = 6.8$  Hz, 6H), 2.83-2.90 (m, 1H), 3.26 (s, 3H), 3.62-3.64 (m, 2H), 4.22-4.25 (m, 2H), 6.83-6.87 (m, 1H), 6.91-6.94 (m, 2H), 7.17-7.31 (m, 4H), 7.87 (d,  $J = 2.4$  Hz, 1H), 8.19 (d,  $J = 2.4$  Hz, 1H), 9.41 (br s, 1H), 10.09 (br s, 1H);  $^{13}\text{C}$  NMR ( $\text{DMSO}-d_6$ , 100 MHz)  $\delta$ : 24.4, 33.0, 48.0 (q,  $J_{\text{C,F}} = 35.0$  Hz), 116.4, 117.1, 117.7, 119.2, 123.4, 124.6 (q,  $J_{\text{C,F}} = 270.0$  Hz), 125.9, 127.9, 128.6, 129.8, 131.3, 131.5, 138.9, 139.4, 145.3, 154.6, 155.3, 160.7, 192.2;  $^{19}\text{F}$  NMR ( $\text{CDCl}_3$ , 470 MHz)  $\delta$ : -70.09; HRMS (ESI-TOF)  $m/z$ : Calcd. for  $\text{C}_{23}\text{H}_{20}\text{F}_3\text{NNaO}_4$   $[\text{M}+\text{Na}]^+$ : 454.1237; Found: 454.1232.

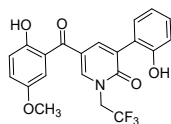

**5-(2-hydroxy-5-methoxybenzoyl)-3-(2-hydroxyphenyl)-1-(2,2,2-trifluoroethyl)pyridin-**

**2(1H)-one (3de):** Light yellow solid, m.p. 105.7-106.3 °C; 114.4 mg, yield 91%; <sup>1</sup>H NMR (DMSO-*d*<sub>6</sub>, 400 MHz) δ: 3.72 (s, 3H), 5.03-5.10 (m, 2H), 6.82-6.86 (m, 1H), 6.90-6.94 (m, 3H), 7.01-7.04 (m, 1H), 7.18-7.22 (m, 1H), 7.25-7.27 (m, 1H), 7.87 (d, *J* = 2.4 Hz, 1H), 8.31 (d, *J* = 2.4 Hz, 1H), 9.48 (br s, 1H), 9.74 (br s, 1H); <sup>13</sup>C NMR (DMSO-*d*<sub>6</sub>, 100 MHz) δ: 48.0 (q, *J*<sub>C,F</sub> = 34.4 Hz), 55.9, 113.9, 116.4, 117.6, 118.1, 119.2, 119.8, 123.4, 124.1 (q, *J*<sub>C,F</sub> = 270.2 Hz), 125.8, 128.6, 129.8, 131.3, 138.8, 145.4, 150.1, 152.4, 155.3, 160.7, 191.7; <sup>19</sup>F NMR (CDCl<sub>3</sub>, 470 MHz) δ: -70.10; HRMS (ESI-TOF) *m/z*: Calcd. for C<sub>21</sub>H<sub>16</sub>F<sub>3</sub>NNaO<sub>5</sub> [M+Na]<sup>+</sup>: 442.0873; Found: 442.0873.

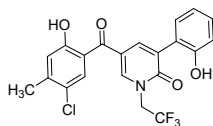

**5-(5-chloro-2-hydroxy-4-methylbenzoyl)-3-(2-hydroxyphenyl)-1-(2,2,2-**

**trifluoroethyl)pyridin-2(1H)-one (3df):** Light yellow solid, m.p. 103.8-104.8 °C; 118.0 mg, yield 90%; <sup>1</sup>H NMR (DMSO-*d*<sub>6</sub>, 400 MHz) δ: 2.33 (s, 3H), 5.02-5.09 (m, 2H), 6.82-6.86 (m, 1H), 6.91 (d, *J* = 7.6 Hz, 1H), 6.96 (s, 1H), 7.17-7.22 (m, 1H), 7.25-7.27 (m, 1H), 7.36 (s, 1H), 7.86 (d, *J* = 2.4 Hz, 1H), 8.32 (d, *J* = 2.0 Hz, 1H), 9.48 (br s, 1H), 10.37 (br s, 1H); <sup>13</sup>C NMR (DMSO-*d*<sub>6</sub>, 100 MHz) δ: 20.3, 48.0 (q, *J*<sub>C,F</sub> = 35.7 Hz), 116.4, 117.5, 119.2, 119.5, 123.3, 123.8, 124.2 (q, *J*<sub>C,F</sub> = 270.1 Hz), 125.8, 128.6, 129.8, 130.0, 131.3, 138.6, 140.6, 145.6, 154.9, 155.3, 160.7, 190.4; <sup>19</sup>F NMR (CDCl<sub>3</sub>, 470 MHz) δ: -70.25; HRMS (ESI-TOF) *m/z*: Calcd. for C<sub>21</sub>H<sub>15</sub>ClF<sub>3</sub>NNaO<sub>4</sub> [M+Na]<sup>+</sup>: 460.0534; Found: 460.0535.

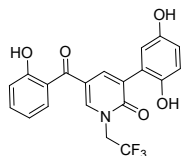

**3-(2,5-dihydroxyphenyl)-5-(2-hydroxybenzoyl)-1-(2,2,2-trifluoroethyl)pyridin-2(1H)-one**

**(3dg):** Light yellow solid, m.p. 106.9-107.9 °C; 93.6 mg, yield 77%; <sup>1</sup>H NMR (DMSO-*d*<sub>6</sub>, 400 MHz) δ: 5.04-5.11 (m, 2H), 6.61-6.64 (m, 1H), 6.71-6.74 (m, 2H), 6.93-7.00 (m, 2H), 7.35-7.43 (m, 2H), 7.87 (d, *J* = 2.4 Hz, 1H), 8.28 (d, *J* = 2.4 Hz, 1H), 8.73 (br s, 1H), 8.80 (br s, 1H), 10.23

(br s, 1H);  $^{13}\text{C}$  NMR (DMSO- $d_6$ , 100 MHz)  $\delta$ : 48.0 (q,  $J_{C,F}$  = 35.5 Hz), 116.5, 117.1, 117.2, 117.4, 117.8, 119.7, 123.6, 124.3 (q,  $J_{C,F}$  = 270.5 Hz), 125.8, 128.3, 130.3, 133.3, 139.0, 145.1, 147.7, 150.0, 156.3, 160.8, 192.1;  $^{19}\text{F}$  NMR ( $\text{CDCl}_3$ , 470 MHz)  $\delta$ : -70.24; HRMS (ESI-TOF)  $m/z$ : Calcd. for  $\text{C}_{20}\text{H}_{14}\text{F}_3\text{NNaO}_5$   $[\text{M}+\text{Na}]^+$ : 428.0716; Found: 428.0717.

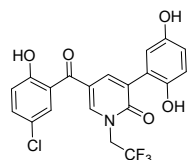

**5-(5-chloro-2-hydroxybenzoyl)-3-(2,5-dihydroxyphenyl)-1-(2,2,2-trifluoroethyl)pyridin-2(1H)-one (3dh)**: Light yellow solid, m.p. 103.8-105.0 °C; 102.7 mg, yield 78%;  $^1\text{H}$  NMR (DMSO- $d_6$ , 400 MHz)  $\delta$ : 5.02-5.09 (m, 2H), 6.61-6.64 (m, 1H), 6.71-6.74 (m, 2H), 7.00 (d,  $J$  = 8.8 Hz, 1H), 7.36 (s, 1H), 7.42-7.44 (m, 1H), 7.87 (d,  $J$  = 2.4 Hz, 1H), 8.29 (d,  $J$  = 2.0 Hz, 1H), 8.74 (br s, 1H), 8.79 (br s, 1H), 10.40 (br s, 1H);  $^{13}\text{C}$  NMR (DMSO- $d_6$ , 100 MHz)  $\delta$ : 48.1 (q,  $J_{C,F}$  = 35.2 Hz), 116.5, 117.2, 117.4, 118.8, 123.0, 123.3, 123.5, 124.7 (q,  $J_{C,F}$  = 270.1 Hz), 127.3, 128.5, 129.3, 132.4, 138.5, 145.7, 147.7, 150.0, 154.7, 160.8, 190.4;  $^{19}\text{F}$  NMR ( $\text{CDCl}_3$ , 470 MHz)  $\delta$ : -70.26; HRMS (ESI-TOF)  $m/z$ : Calcd. for  $\text{C}_{20}\text{H}_{13}\text{ClF}_3\text{NNaO}_5$   $[\text{M}+\text{Na}]^+$ : 462.0327; Found: 462.0331.

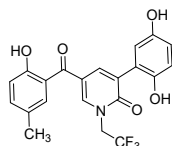

**3-(2,5-dihydroxyphenyl)-5-(2-hydroxy-5-methylbenzoyl)-1-(2,2,2-trifluoroethyl)pyridin-2(1H)-one (3di)**: Light yellow solid, m.p. 109.7-110.5 °C; 104.3 mg, yield 83%;  $^1\text{H}$  NMR (DMSO- $d_6$ , 400 MHz)  $\delta$ : 2.25 (s, 3H), 5.04-5.11 (m, 2H), 6.62-6.65 (m, 1H), 6.72-6.74 (m, 2H), 6.89 (d,  $J$  = 8.4 Hz, 1H), 7.18 (d,  $J$  = 2.0 Hz, 1H), 7.21-7.24 (m, 1H), 7.87 (d,  $J$  = 2.8 Hz, 1H), 8.29 (d,  $J$  = 2.0 Hz, 1H), 8.73 (br s, 1H), 8.80 (br s, 1H), 10.03 (br s, 1H);  $^{13}\text{C}$  NMR (DMSO- $d_6$ , 100 MHz)  $\delta$ : 20.4, 48.1 (q,  $J_{C,F}$  = 35.8 Hz), 116.5, 117.0, 117.2, 117.4, 117.8, 123.6, 124.3 (q,  $J_{C,F}$  = 270.6 Hz), 124.7, 125.9, 128.3, 130.5, 134.0, 139.2, 145.0, 147.7, 150.0, 154.3, 160.8, 192.3;  $^{19}\text{F}$  NMR ( $\text{CDCl}_3$ , 470 MHz)  $\delta$ : -70.30; HRMS (ESI-TOF)  $m/z$ : Calcd. for  $\text{C}_{21}\text{H}_{16}\text{F}_3\text{NNaO}_5$   $[\text{M}+\text{Na}]^+$ : 442.0873; Found: 442.0876.

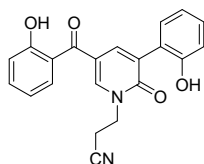

**3-(5-(2-hydroxybenzoyl)-3-(2-hydroxyphenyl)-2-oxopyridin-1(2H)-yl)propanenitrile (3ea):**

Light yellow solid, m.p. 145.3-146.6 °C; 94.0 mg, yield 87%; <sup>1</sup>H NMR (DMSO-*d*<sub>6</sub>, 400 MHz)  $\delta$ : 2.99-3.00 (m, 2H), 4.29-4.32 (m, 2H), 6.79-6.83 (m, 1H), 6.87-6.92 (m, 2H), 6.96 (d, *J* = 8.0 Hz, 1H), 7.13-7.17 (m, 1H), 7.24-7.26 (m, 1H), 7.36-7.40 (m, 2H), 7.85 (d, *J* = 2.4 Hz, 1H), 8.35 (d, *J* = 2.4 Hz, 1H), 9.36 (br s, 1H), 10.27 (br s, 1H); <sup>13</sup>C NMR (DMSO-*d*<sub>6</sub>, 100 MHz)  $\delta$ : 17.3, 46.3, 116.7, 117.3, 117.5, 118.7, 119.3, 119.7, 123.6, 124.9, 128.2, 129.7, 130.6, 131.4, 133.4, 139.1, 144.8, 155.4, 156.9, 161.1, 192.5; HRMS (ESI-TOF) *m/z*: Calcd. for C<sub>21</sub>H<sub>16</sub>N<sub>2</sub>NaO<sub>4</sub> [M+Na]<sup>+</sup>: 383.1002; Found: 383.1009.

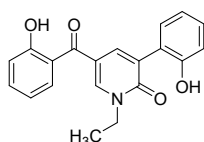

**1-ethyl-5-(2-hydroxybenzoyl)-3-(2-hydroxyphenyl)pyridin-2(1H)-one (3fa):** Light yellow solid; 92.5 mg, yield 92%; <sup>1</sup>H NMR (CDCl<sub>3</sub>, 400 MHz)  $\delta$ : 1.39-1.43 (m, 3H), 4.12-4.18 (m, 2H), .83-6.90 (m, 2H), 6.96-7.02 (m, 2H), 7.14-7.18 (m, 1H), 7.22-7.26 (m, 1H), 7.43-7.52 (m, 2H), 7.92 (s, 1H), 7.97 (s, 1H), 8.99 (br s, 1H), 11.38 (br s, 1H); <sup>13</sup>C NMR (CDCl<sub>3</sub>, 100 MHz)  $\delta$ : 14.7, 47.3, 118.7, 118.9, 119.2, 119.5, 119.8, 121.0, 124.3, 130.6, 130.7, 131.1, 131.8, 136.6, 140.2, 140.7, 156.2, 162.5, 162.7, 195.3; HRMS (ESI-TOF) *m/z*: Calcd. for C<sub>20</sub>H<sub>17</sub>NNaO<sub>4</sub> [M+Na]<sup>+</sup>: 358.1050; Found: 358.1047.

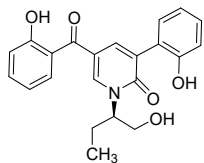

**(*R*)-5-(2-hydroxybenzoyl)-1-(1-hydroxybutan-2-yl)-3-(2-hydroxyphenyl)pyridin-2(1H)-one(3ga):** Light yellow solid, m.p. 155.2-156.1 °C; 103.5 mg, yield 91%; <sup>1</sup>H NMR (CDCl<sub>3</sub>, 400 MHz)  $\delta$ : 0.87-0.90 (m, 3H), 1.74-1.93 (m, 2H), 2.63 (br s, 1H), 3.85 (d, *J* = 4.0 Hz, 2H), 5.03-5.09 (m, 1H), 6.81-7.01 (m, 4H), 7.15-7.18 (m, 1H), 7.21-7.25 (m, 1H), 7.42-7.46 (m, 1H), 7.52-7.54 (m, 1H), 7.31 (d, *J* = 2.4 Hz, 1H), 8.10 (d, *J* = 2.4 Hz, 1H), 8.88 (br s, 1H), 11.42 (br s, 1H);

$^{13}\text{C}$  NMR ( $\text{CDCl}_3$ , 100 MHz)  $\delta$ : 10.6, 23.1, 53.5, 62.9, 118.7, 118.8, 119.0, 119.2, 119.6, 121.1, 124.5, 130.6, 130.7, 130.9, 131.9, 136.6, 139.6, 140.0, 155.9, 162.7, 163.2, 195.5; HRMS (ESI-TOF)  $m/z$ : Calcd. for  $\text{C}_{22}\text{H}_{21}\text{NNaO}_5$   $[\text{M}+\text{Na}]^+$ : 402.1312; Found: 402.1317.

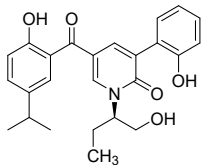

**(R)-5-(2-hydroxy-5-isopropylbenzoyl)-1-(1-hydroxybutan-2-yl)-3-(2-hydroxyphenyl)pyridin-2(1H)-one (3gb)**: Light yellow solid, m.p. 175.6-176.7 °C; 109.9 mg, yield 87%;  $^1\text{H}$  NMR ( $\text{DMSO}-d_6$ , 400 MHz)  $\delta$ : 0.85-0.88 (m, 3H), 1.17-1.20 (m, 6H), 1.67-1.74 (m, 1H), 1.81-1.88 (m, 1H), 2.83-2.89 (m, 1H), 3.62-3.65 (m, 1H), 3.73-3.76 (m, 1H), 4.91 (br s, 1H), 5.09 (br s, 1H), 6.84-6.88 (m, 1H), 6.92-6.96 (m, 2H), 7.18-7.22 (m, 1H), 7.28-7.32 (m, 3H), 7.88 (d,  $J = 2.4$  Hz, 1H), 8.18 (d,  $J = 2.4$  Hz, 1H), 9.41 (br s, 1H), 10.20 (br s, 1H);  $^{13}\text{C}$  NMR ( $\text{DMSO}-d_6$ , 100 MHz)  $\delta$ : 10.8, 23.3, 24.3, 24.4, 33.0, 61.8, 116.8, 116.9, 117.2, 119.4, 124.3, 124.4, 128.0, 129.6, 131.4, 131.6, 138.0, 139.4, 155.0, 155.5, 161.7, 192.7, two carbons missing in the aromatic region; HRMS (ESI-TOF)  $m/z$ : Calcd. for  $\text{C}_{25}\text{H}_{27}\text{NNaO}_5$   $[\text{M}+\text{Na}]^+$ : 444.1781; Found: 444.1786.

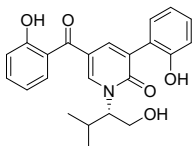

**(S)-1-(1-hydroxy-3-methylbutan-2-yl)-5-(2-hydroxybenzoyl)-3-(2-hydroxyphenyl)pyridin-2(1H)-one (3ha)**: Light yellow solid, m.p. 135.9-136.2 °C; 104.9 mg, yield 89%;  $^1\text{H}$  NMR ( $\text{DMSO}-d_6$ , 400 MHz)  $\delta$ : 0.77 (d,  $J = 7.2$  Hz, 3H), 1.04 (d,  $J = 6.4$  Hz, 3H), 2.14 (br s, 1H), 3.64 (d,  $J = 10.4$  Hz, 1H), 3.87 (d,  $J = 6.4$  Hz, 1H), 4.71 (br s, 1H), 5.05 (br s, 1H), 6.84-6.88 (m, 1H), 6.90-6.97 (m, 2H), 7.00 (d,  $J = 8.0$  Hz, 1H), 7.17-7.22 (m, 1H), 7.27-7.30 (m, 1H), 7.38-7.43 (m, 2H), 7.87 (d,  $J = 2.8$  Hz, 1H), 8.24 (d,  $J = 2.4$  Hz, 1H), 9.40 (br s, 1H), 10.28 (br s, 1H);  $^{13}\text{C}$  NMR ( $\text{DMSO}-d_6$ , 100 MHz)  $\delta$ : 19.6, 21.2, 28.5, 60.2, 116.8, 116.9, 117.1, 119.4, 119.7, 124.4, 125.2, 127.9, 129.5, 130.4, 131.4, 133.2, 137.9, 155.5, 156.4, 161.9, 170.8, 192.5; HRMS (ESI-TOF)  $m/z$ : Calcd. for  $\text{C}_{23}\text{H}_{23}\text{NNaO}_5$   $[\text{M}+\text{Na}]^+$ : 416.1468; Found: 416.1472.

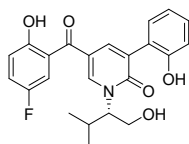

**(S)-5-(5-fluoro-2-hydroxybenzoyl)-1-(1-hydroxy-3-methylbutan-2-yl)-3-(2-hydroxyphenyl)pyridin-2(1H)-one (3hb):** Light yellow solid, m.p. 126.5-127.2 °C; 111.0 mg, yield 90%; <sup>1</sup>H NMR (DMSO-*d*<sub>6</sub>, 400 MHz) δ: 2.31 (s, 3H), 3.28 (s, 3H), 3.62-3.64 (m, 2H), 4.23-4.26 (m, 2H), 6.77-6.92 (m, 4H), 7.17-7.21 (m, 1H), 7.27-7.30 (m, 1H), 7.35 (d, *J* = 7.6 Hz, 1H), 7.84 (d, *J* = 2.8 Hz, 1H), 8.20 (d, *J* = 2.4 Hz, 1H), 9.41 (br s, 1H), 10.47 (br s, 1H); <sup>13</sup>C NMR (DMSO-*d*<sub>6</sub>, 100 MHz) δ: 19.6, 21.1, 28.5, 60.2, 115.9 (d, *J*<sub>CF</sub> = 24.4 Hz), 116.4, 116.7, 118.1 (d, *J*<sub>CF</sub> = 7.3 Hz), 119.3, 119.4 (d, *J*<sub>CF</sub> = 23.3 Hz), 124.3, 126.4 (d, *J*<sub>CF</sub> = 7.2 Hz), 127.9, 129.5, 131.4, 137.4, 152.0, 155.4, 155.5 (d, *J*<sub>CF</sub> = 234.5 Hz), 161.8, 170.8, 190.7; <sup>19</sup>F NMR (CDCl<sub>3</sub>, 470 MHz) δ: -123.29; HRMS (ESI-TOF) *m/z*: Calcd. for C<sub>23</sub>H<sub>22</sub>FNNaO<sub>5</sub> [M+Na]<sup>+</sup>: 434.1374; Found: 434.1374.

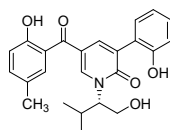

**(S)-1-(1-hydroxy-3-methylbutan-2-yl)-5-(2-hydroxy-5-methylbenzoyl)-3-(2-hydroxyphenyl)pyridin-2(1H)-one (3hc):** Light yellow solid, m.p. 176.5-177.1 °C; 106.2 mg, yield 87%; <sup>1</sup>H NMR (DMSO-*d*<sub>6</sub>, 400 MHz) δ: 0.78 (d, *J* = 6.8 Hz, 3H), 1.05 (d, *J* = 6.4 Hz, 3H), 2.15 (s, 1H), 2.25 (s, 3H), 3.64 (d, *J* = 12.0 Hz, 1H), 3.87-3.89 (m, 1H), 4.71 (br s, 1H), 5.06 (br s, 1H), 6.83-6.92 (m, 3H), 7.17-7.24 (m, 3H), 7.27-7.30 (m, 1H), 7.86 (d, *J* = 2.8 Hz, 1H), 8.24 (s, 1H), 9.40 (br s, 1H), 10.11 (br s, 1H); <sup>13</sup>C NMR (DMSO-*d*<sub>6</sub>, 100 MHz) δ: 19.7, 20.4, 21.2, 28.5, 60.2, 116.8, 116.9, 117.0, 119.4, 124.4, 124.6, 127.8, 128.3, 129.5, 130.7, 131.4, 134.0, 137.9, 154.5, 155.4, 161.8, 192.6, one carbon missing in the aromatic region; HRMS (ESI-TOF) *m/z*: Calcd. for C<sub>24</sub>H<sub>25</sub>NNaO<sub>5</sub> [M+Na]<sup>+</sup>: 430.1625; Found: 430.1627.

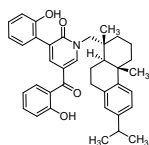

**5-(2-hydroxybenzoyl)-3-(2-hydroxyphenyl)-1-(((1R,4aS,10aR)-7-isopropyl-1,4a-dimethyl-**

**1,2,3,4,4a,9,10,10a-octahydrophenanthren-1-yl)methyl)pyridin-2(1H)-one (3ia):** Light yellow solid, m.p. 180.7-181.5 °C; 151.8 mg, yield 88%; <sup>1</sup>H NMR (CDCl<sub>3</sub>, 400 MHz) δ: 1.02 (s, 3H), 1.14 (s, 3H), 1.16 (s, 3H), 1.18 (s, 3H), 1.31-1.35 (m, 1H), 1.45 (d, *J* = 10.8 Hz, 1H), 1.51-1.54 (m, 2H), 1.62-1.67 (m, 2H), 1.80-1.89 (m, 1H), 1.96-2.01 (m, 1H), 2.22 (d, *J* = 12.8 Hz, 1H), 2.72-2.91 (m, 3H), 3.81 (d, *J* = 12.8 Hz, 1H), 4.47 (d, *J* = 12.8 Hz, 1H), 6.79-6.82 (m, 2H), 6.88-6.93 (m, 2H), 6.98-7.08 (m, 3H), 7.16-7.18 (m, 1H), 7.24-7.28 (m, 1H), 7.44-7.52 (m, 2H), 7.88-7.93 (m, 2H), 8.83 (br s, 1H), 11.33 (br s, 1H); <sup>13</sup>C NMR (CDCl<sub>3</sub>, 100 MHz) δ: 17.3, 17.4, 18.6, 23.0, 24.7, 28.7, 32.4, 36.0, 36.8, 37.0, 38.8, 45.1, 59.6, 117.5, 117.6, 117.9, 118.1, 118.8, 119.9, 122.9, 123.0, 123.5, 126.0, 129.5, 129.7, 130.3, 130.7, 133.3, 135.6, 139.1, 141.6, 144.9, 145.8, 155.1, 161.6, 162.6, 194.2; HRMS (ESI-TOF) *m/z*: Calcd. for C<sub>38</sub>H<sub>41</sub>NNaO<sub>4</sub> [M+Na]<sup>+</sup>: 598.2928; Found: 598.2925.

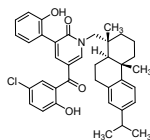

**5-(5-chloro-2-hydroxybenzoyl)-3-(2-hydroxyphenyl)-1-(((1R,4aS,10aR)-7-isopropyl-1,4a-dimethyl-1,2,3,4,4a,9,10,10a-octahydrophenanthren-1-yl)methyl)pyridin-2(1H)-one (3ib):** Light yellow solid, m.p. 188.8-189.6 °C; 158.9 mg, yield 87%; <sup>1</sup>H NMR (CDCl<sub>3</sub>, 400 MHz) δ: 1.01 (s, 3H), 1.13 (s, 3H), 1.15 (s, 3H), 1.18 (s, 3H), 1.32-1.35 (m, 1H), 1.42 (d, *J* = 12.0 Hz, 1H), 1.53-1.57 (m, 2H), 1.64-1.67 (m, 2H), 1.79-1.87 (m, 1H), 1.97-2.02 (m, 1H), 2.23 (d, *J* = 12.4 Hz, 1H), 2.70-2.93 (m, 3H), 3.73 (d, *J* = 12.4 Hz, 1H), 4.47 (d, *J* = 13.2 Hz, 1H), 6.82 (s, 1H), 6.88-6.92 (m, 2H), 6.95-6.98 (m, 2H), 7.06 (d, *J* = 8.0 Hz, 1H), 7.16-7.19 (m, 1H), 7.22-7.26 (m, 1H), 7.39-7.41 (m, 1H), 7.53 (d, *J* = 2.4 Hz, 1H), 7.84 (d, *J* = 2.4 Hz, 1H), 7.92 (d, *J* = 2.4 Hz, 1H), 8.69 (br s, 1H), 11.14 (br s, 1H); <sup>13</sup>C NMR (CDCl<sub>3</sub>, 100 MHz) δ: 17.2, 17.3, 18.6, 22.9, 24.7, 28.8, 32.4, 36.5, 36.7, 37.0, 38.8, 45.5, 60.1, 116.7, 118.3, 118.8, 119.5, 120.0, 122.8, 122.9, 123.0, 123.3, 125.9, 129.6, 129.7, 129.8, 130.9, 133.3, 135.3, 138.7, 142.2, 144.9, 145.8, 155.0, 159.9, 162.6, 192.9; HRMS (ESI-TOF) *m/z*: Calcd. for C<sub>38</sub>H<sub>40</sub>ClNNaO<sub>4</sub> [M+Na]<sup>+</sup>: 632.2534; Found: 632.2530.



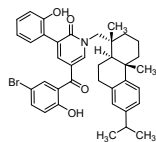

**5-(5-bromo-2-hydroxybenzoyl)-3-(2-hydroxyphenyl)-1-(((1R,4aS,10aR)-7-isopropyl-1,4a-dimethyl-1,2,3,4,4a,9,10,10a-octahydrophenanthren-1-yl)methyl)pyridin-2(1H)-one (3ic):**

Light yellow solid, m.p. 176.5-176.7 °C; 164.6 mg, yield 84%; <sup>1</sup>H NMR (CDCl<sub>3</sub>, 400 MHz) δ: 1.02 (s, 3H), 1.13 (s, 3H), 1.15 (s, 3H), 1.18 (s, 3H), 1.35-1.38 (m, 1H), 1.43 (d, *J* = 12.0 Hz, 1H), 1.51-1.58 (m, 2H), 1.65-1.71 (m, 2H), 1.81-1.87 (m, 1H), 1.98-2.03 (m, 1H), 2.24 (d, *J* = 12.8 Hz, 1H), 2.71-2.91 (m, 3H), 3.73 (d, *J* = 13.2 Hz, 1H), 4.49 (d, *J* = 13.2 Hz, 1H), 6.82 (s, 1H), 6.89-6.97 (m, 4H), 7.06 (d, *J* = 8.4 Hz, 1H), 7.17-7.20 (m, 1H), 7.23-7.27 (m, 1H), 7.52-7.55 (m, 1H), 7.69 (d, *J* = 2.4 Hz, 1H), 7.85 (d, *J* = 2.4 Hz, 1H), 7.94 (d, *J* = 2.4 Hz, 1H), 8.68 (br s, 1H), 11.16 (br s, 1H); <sup>13</sup>C NMR (CDCl<sub>3</sub>, 100 MHz) δ: 17.2, 17.3, 18.6, 22.9, 24.7, 28.8, 32.4, 36.5, 36.7, 37.0, 38.8, 45.5, 60.2, 109.6, 118.8, 119.9, 120.0, 122.9, 125.9, 129.7, 129.8, 132.5, 133.3, 138.0, 142.2, 155.0, 160.3, 162.6, 192.8, eight carbons missing in the aromatic region; HRMS (ESI-TOF) *m/z*: Calcd. for C<sub>38</sub>H<sub>40</sub>BrNNaO<sub>4</sub> [M+Na]<sup>+</sup>: 676.2033; Found: 676.2035.

**9. Synthesis of chiral imidazoles 4 by reaction of 1,2-diphenylethylenediamine 2**

In a sealed tube equipped with a magnetic stirring bar, to 1.5 mL of EtOH was added 3-vinyl benzofuranone-chromone **1** (0.4 mmol) and the 1,2-diphenylethylenediamine **2** (0.3 mmol). The reaction mixture was stirred at rt for 5 h. After completion of the reaction, as indicated by TLC, the reaction product was filtered, washed with EtOH to afford pure product **4**.

**10. Characterization data of chiral imidazoles 4**

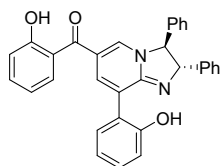

**(2-hydroxyphenyl)((2S,3S)-8-(2-hydroxyphenyl)-2,3-diphenyl-2,3-dihydroimidazo[1,2-a]pyridin-6-yl)methanone (4a):** Light yellow solid, m.p. >300.0 °C; 124.9 mg, yield 86%; <sup>1</sup>H NMR (DMSO-*d*<sub>6</sub>, 400 MHz) δ: 5.25 (d, *J* = 7.6 Hz, 1H), 5.60 (d, *J* = 7.6 Hz, 1H), 6.87-6.99 (m, 4H), 7.29-7.55 (m, 14H), 7.67 (s, 1H), 7.72 (s, 1H), 10.19 (br s, 1H), 10.83 (br s, 1H); <sup>13</sup>C NMR

(DMSO-*d*<sub>6</sub>, 100 MHz)  $\delta$ : 72.9, 76.4, 116.9, 117.7, 119.2, 119.5, 120.2, 123.5, 124.1, 125.6, 127.0, 127.3, 128.2, 129.3, 129.9, 130.1, 130.3, 130.5, 132.8, 136.6, 140.1, 142.8, 156.0, 156.5, 156.7, 191.0, six carbons missing in the aromatic region; HRMS (ESI-TOF) *m/z*: Calcd. for C<sub>32</sub>H<sub>25</sub>N<sub>2</sub>O<sub>3</sub> [M+H]<sup>+</sup>: 485.1860; Found: 485.1856.

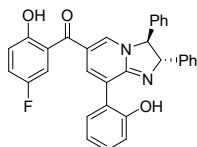

**(5-fluoro-2-hydroxyphenyl)((2*S*,3*S*)-8-(2-hydroxyphenyl)-2,3-diphenyl-2,3-dihydroimidazo[1,2-*a*]pyridin-6-yl)methanone (4b)**: Light yellow solid, m.p. >300.0 °C; 105.4 mg, yield 70%; <sup>1</sup>H NMR (DMSO-*d*<sub>6</sub>, 400 MHz)  $\delta$ : 5.20 (d, *J* = 8.0 Hz, 1H), 5.54 (d, *J* = 7.2 Hz, 1H), 6.85-6.94 (m, 3H), 7.05-7.08 (m, 1H), 7.12-7.17 (m, 1H), 7.24-7.51 (m, 12H), 7.65 (s, 1H), 7.66 (s, 1H), 10.05 (br s, 1H), 10.66 (br s, 1H); <sup>13</sup>C NMR (DMSO-*d*<sub>6</sub>, 100 MHz)  $\delta$ : 72.8, 76.4, 115.8 (d, *J*<sub>CF</sub> = 23.3 Hz), 117.3, 118.0 (d, *J*<sub>CF</sub> = 8.5 Hz), 119.0 (d, *J*<sub>CF</sub> = 22.1 Hz), 120.2, 123.5, 124.0, 127.0, 127.2, 128.2, 129.3, 129.9, 130.3, 130.6, 136.2, 140.2, 141.2, 142.8, 151.8, 155.4 (d, *J*<sub>CF</sub> = 238.4 Hz), 156.4, 189.3, eight carbons missing in the aromatic region; <sup>19</sup>F NMR (CDCl<sub>3</sub>, 470 MHz)  $\delta$ : -125.26; HRMS (ESI-TOF) *m/z*: Calcd. for C<sub>32</sub>H<sub>24</sub>FN<sub>2</sub>O<sub>3</sub> [M+H]<sup>+</sup>: 503.1765; Found: 503.1771.

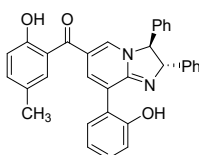

**(2-hydroxy-5-methylphenyl)((2*S*,3*S*)-8-(2-hydroxyphenyl)-2,3-diphenyl-2,3-dihydroimidazo[1,2-*a*]pyridin-6-yl)methanone (4c)**: Light yellow solid, m.p. >300.0 °C; 112.1 mg, yield 75%; <sup>1</sup>H NMR (DMSO-*d*<sub>6</sub>, 400 MHz)  $\delta$ : 2.14 (s, 3H), 5.23 (d, *J* = 7.6 Hz, 1H), 5.54 (d, *J* = 7.6 Hz, 1H), 6.78 (d, *J* = 8.4 Hz, 1H), 6.88 (d, *J* = 8.0 Hz, 1H), 6.91-6.95 (m, 1H), 7.02 (s, 1H), 7.11-7.13 (m, 1H), 7.24-7.51 (m, 12H), 7.61 (s, 1H), 7.68 (s, 1H), 9.95 (br s, 1H), 10.81 (br s, 1H); <sup>13</sup>C NMR (DMSO-*d*<sub>6</sub>, 100 MHz)  $\delta$ : 20.3, 72.9, 76.4, 116.9, 117.6, 119.2, 120.2, 123.5, 124.1, 125.0, 127.0, 127.4, 128.1, 128.2, 129.3, 129.9, 130.3, 130.6, 133.6, 136.6, 140.0, 140.8, 142.8, 154.1, 156.5, 156.8, 191.1, six carbons missing in the aromatic region; HRMS (ESI-TOF) *m/z*: Calcd. for C<sub>33</sub>H<sub>27</sub>N<sub>2</sub>O<sub>3</sub> [M+H]<sup>+</sup>: 499.2016; Found: 499.2019.

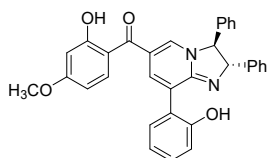

**(2-hydroxy-4-methoxyphenyl)((2*S*,3*S*)-8-(2-hydroxyphenyl)-2,3-diphenyl-2,3-dihydroimidazo[1,2-*a*]pyridin-6-yl)methanone (4d):** Light yellow solid, m.p. 238.1-238.7 °C; 134.2 mg, yield 87%; <sup>1</sup>H NMR (DMSO-*d*<sub>6</sub>, 400 MHz) δ: 3.58 (s, 3H), 5.22 (d, *J* = 7.6 Hz, 1H), 5.55 (d, *J* = 7.2 Hz, 1H), 6.78-6.84 (m, 2H), 6.88-6.96 (m, 3H), 7.25-7.52 (m, 12H), 7.68-7.72 (m, 2H), 9.74 (br s, 1H), 10.75 (br s, 1H); <sup>13</sup>C NMR (DMSO-*d*<sub>6</sub>, 100 MHz) δ: 55.9, 72.9, 76.5, 113.7, 117.6, 118.0, 119.2, 119.5, 120.2, 123.6, 124.1, 125.4, 127.0, 127.4, 128.2, 129.3, 129.9, 130.3, 130.5, 140.1, 140.9, 142.8, 149.9, 152.2, 156.5, 156.8, 190.6, six carbons missing in the aromatic region; HRMS (ESI-TOF) *m/z*: Calcd. for C<sub>33</sub>H<sub>27</sub>N<sub>2</sub>O<sub>4</sub> [M+H]<sup>+</sup>: 515.1965; Found: 515.1962.

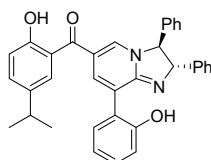

**(2-hydroxy-5-isopropylphenyl)((2*S*,3*S*)-8-(2-hydroxyphenyl)-2,3-diphenyl-2,3-dihydroimidazo[1,2-*a*]pyridin-6-yl)methanone (4e):** Light yellow solid, m.p. 218.9-220.1 °C; 112.0 mg, yield 71%; <sup>1</sup>H NMR (DMSO-*d*<sub>6</sub>, 400 MHz) δ: 1.04-1.08 (m, 6H), 2.69-2.76 (m, 1H), 5.24 (d, *J* = 8.0 Hz, 1H), 5.54 (d, *J* = 8.0 Hz, 1H), 6.84 (d, *J* = 8.4 Hz, 1H), 6.90 (d, *J* = 8.0 Hz, 1H), 6.95 (d, *J* = 7.6 Hz, 1H), 7.07 (d, *J* = 2.0 Hz, 1H), 7.19-7.22 (m, 1H), 7.28-7.53 (m, 12H), 7.61 (s, 1H), 7.74 (s, 1H), 10.16 (br s, 1H), 10.73 (br s, 1H); <sup>13</sup>C NMR (DMSO-*d*<sub>6</sub>, 100 MHz) δ: 24.3, 32.8, 73.0, 76.5, 117.1, 117.6, 119.2, 120.2, 123.7, 124.1, 124.5, 127.1, 127.5, 128.2, 129.3, 129.4, 129.9, 130.3, 130.5, 131.1, 136.5, 139.2, 139.9, 140.9, 142.7, 154.6, 156.5, 156.8, 191.2, five carbons missing in the aromatic region; HRMS (ESI-TOF) *m/z*: Calcd. for C<sub>35</sub>H<sub>31</sub>N<sub>2</sub>O<sub>3</sub> [M+H]<sup>+</sup>: 527.2329; Found: 527.2334.

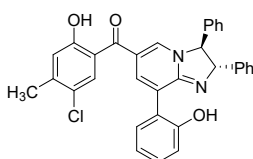

**(5-chloro-2-hydroxy-4-methylphenyl)((2*S*,3*S*)-8-(2-hydroxyphenyl)-2,3-diphenyl-2,3-dihydroimidazo[1,2-*a*]pyridin-6-yl)methanone (4f):** Light yellow solid, m.p. >300.0 °C; 111.7

mg, yield 70%;  $^1\text{H}$  NMR (DMSO- $d_6$ , 400 MHz)  $\delta$ : 2.25 (s, 3H), 5.20 (d,  $J = 7.2$  Hz, 1H), 5.55 (d,  $J = 7.2$  Hz, 1H), 6.85-6.95 (m, 3H), 7.25-7.39 (m, 10H), 7.43-7.51 (m, 3H), 7.68 (d,  $J = 4.0$  Hz, 2H), 10.51 (br s, 2H);  $^{13}\text{C}$  NMR (DMSO- $d_6$ , 100 MHz)  $\delta$ : 20.3, 72.9, 76.4, 117.6, 119.1, 119.4, 120.2, 123.5, 123.6, 124.0, 125.1, 127.0, 127.2, 128.3, 129.1, 129.3, 129.9, 130.3, 130.6, 132.0, 140.2, 141.0, 142.8, 154.7, 156.4, 156.7, 189.2, six carbons missing in the aromatic region; HRMS (ESI-TOF)  $m/z$ : Calcd. for  $\text{C}_{33}\text{H}_{26}\text{ClN}_2\text{O}_3$   $[\text{M}+\text{H}]^+$ : 533.1626; Found: 533.1631.

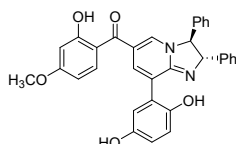

**((2S,3S)-8-(2,5-dihydroxyphenyl)-2,3-diphenyl-2,3-dihydroimidazo[1,2-a]pyridin-6-yl)(2-hydroxy-4-methoxyphenyl)methanone (4g)**: Light yellow solid, m.p. 224.3-225.1 °C; 112.9 mg, yield 71%;  $^1\text{H}$  NMR (DMSO- $d_6$ , 400 MHz)  $\delta$ : 3.59 (s, 3H), 5.21 (d,  $J = 7.6$  Hz, 1H), 5.55 (d,  $J = 7.2$  Hz, 1H), 6.71-6.72 (m, 2H), 6.77 (d,  $J = 2.8$  Hz, 1H), 6.81 (d,  $J = 8.8$  Hz, 1H), 6.89-6.91 (m, 2H), 7.27-7.50 (m, 10H), 7.67 (s, 2H), 8.96 (br s, 1H), 9.67 (br s, 2H);  $^{13}\text{C}$  NMR (DMSO- $d_6$ , 100 MHz)  $\delta$ : 55.9, 72.8, 76.5, 113.7, 116.1, 117.5, 117.6, 118.0, 119.4, 120.1, 123.8, 124.5, 125.5, 127.0, 127.3, 128.2, 129.1, 129.3, 129.9, 132.0, 132.2, 136.4, 140.1, 140.9, 142.8, 148.9, 149.8, 150.8, 152.2, 156.6, 190.6, two carbons missing in the aromatic region; HRMS (ESI-TOF)  $m/z$ : Calcd. for  $\text{C}_{33}\text{H}_{27}\text{N}_2\text{O}_5$   $[\text{M}+\text{H}]^+$ : 531.1914; Found: 531.1912.

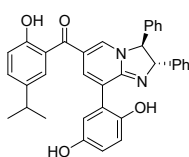

**((2S,3S)-8-(2,5-dihydroxyphenyl)-2,3-diphenyl-2,3-dihydroimidazo[1,2-a]pyridin-6-yl)(2-hydroxy-5-isopropylphenyl)methanone (4h)**: Light yellow solid, m.p. 209.3-211.2 °C; 115.4 mg, yield 71%;  $^1\text{H}$  NMR (DMSO- $d_6$ , 400 MHz)  $\delta$ : 1.03-1.07 (m, 6H), 2.68-2.75 (m, 1H), 5.23 (d,  $J = 8.0$  Hz, 1H), 5.53 (d,  $J = 8.0$  Hz, 1H), 6.70-6.75 (m, 2H), 6.83 (d,  $J = 8.4$  Hz, 1H), 6.91 (s, 1H), 7.06 (s, 1H), 7.18-7.21 (m, 1H), 7.27-7.49 (m, 10H), 7.60 (s, 1H), 7.71 (s, 1H), 9.00 (br s, 1H), 10.01 (br s, 2H);  $^{13}\text{C}$  NMR (DMSO- $d_6$ , 100 MHz)  $\delta$ : 24.3, 32.8, 73.0, 76.5, 116.1, 117.1, 117.5, 117.6, 120.2, 123.9, 124.5, 127.0, 127.5, 128.2, 129.1, 129.3, 129.4, 129.9, 131.1, 132.0, 136.4, 139.2, 139.9, 140.9, 142.7, 149.0, 150.8, 154.6, 156.6, 191.2, four carbons missing in the aromatic

region; HRMS (ESI-TOF)  $m/z$ : Calcd. for  $C_{35}H_{31}N_2O_4$   $[M+H]^+$ : 543.2278; Found: 543.2272.

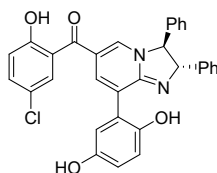

**(5-chloro-2-hydroxyphenyl)((2S,3S)-8-(2,5-dihydroxyphenyl)-2,3-diphenyl-2,3-dihydroimidazo[1,2-a]pyridin-6-yl)methanone (4i)**: Light yellow solid, m.p. 284.2-285.5 °C; 121.8 mg, yield 76%;  $^1H$  NMR (DMSO- $d_6$ , 400 MHz)  $\delta$ : 5.22 (d,  $J = 7.2$  Hz, 1H), 5.55 (d,  $J = 7.2$  Hz, 1H), 6.71-6.75 (m, 2H), 6.90 (d,  $J = 8.4$  Hz, 2H), 7.25-7.50 (m, 12H), 7.65-7.67 (m, 2H), 9.00 (br s, 1H), 10.12 (br s, 2H);  $^{13}C$  NMR (DMSO- $d_6$ , 100 MHz)  $\delta$ : 72.8, 76.4, 116.1, 117.5, 117.6, 118.6, 120.1, 123.1, 123.8, 124.4, 127.0, 127.2, 127.7, 128.3, 129.1, 129.3, 129.9, 132.0, 136.1, 140.1, 141.2, 142.7, 148.9, 150.8, 154.5, 156.6, 189.2, five carbons missing in the aromatic region; HRMS (ESI-TOF)  $m/z$ : Calcd. for  $C_{32}H_{24}ClN_2O_4$   $[M+H]^+$ : 535.1419; Found: 535.1414.

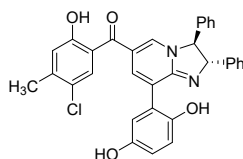

**(5-chloro-2-hydroxy-4-methylphenyl)((2S,3S)-8-(2,5-dihydroxyphenyl)-2,3-diphenyl-2,3-dihydroimidazo[1,2-a]pyridin-6-yl)methanone (4j)**: Light yellow solid, m.p. >300.0 °C; 126.6 mg, yield 77%;  $^1H$  NMR (DMSO- $d_6$ , 400 MHz)  $\delta$ : 2.25 (s, 3H), 5.20 (d,  $J = 7.6$  Hz, 1H), 5.54 (d,  $J = 7.2$  Hz, 1H), 6.71 (s, 2H), 6.85 (d,  $J = 12.4$  Hz, 2H), 7.25-7.50 (m, 11H), 7.64 (s, 1H), 7.68 (s, 1H), 8.95 (br s, 1H), 10.10 (br s, 2H);  $^{13}C$  NMR (DMSO- $d_6$ , 100 MHz)  $\delta$ : 20.3, 72.8, 76.4, 116.1, 117.5, 117.6, 119.4, 120.1, 123.6, 123.7, 124.5, 125.1, 127.0, 127.2, 128.3, 129.1, 129.3, 129.8, 129.9, 132.0, 136.4, 140.1, 140.2, 141.0, 142.8, 148.9, 150.8, 154.7, 156.6, 189.2, three carbons missing in the aromatic region; HRMS (ESI-TOF)  $m/z$ : Calcd. for  $C_{33}H_{26}ClN_2O_4$   $[M+H]^+$ : 549.1576; Found: 549.1574.

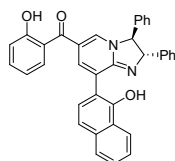

**((2S,3S)-8-(1-hydroxynaphthalen-2-yl)-2,3-diphenyl-2,3-dihydroimidazo[1,2-a]pyridin-6-**

**yl)(2-hydroxyphenyl)methanone (4k):** Light yellow solid, m.p. >300.0 °C; 115.3 mg, yield 72%; <sup>1</sup>H NMR (CDCl<sub>3</sub>, 400 MHz) δ: 5.15 (d, *J* = 8.4 Hz, 1H), 5.38 (d, *J* = 8.4 Hz, 1H), 6.70-6.74 (m, 1H), 6.95 (d, *J* = 8.0 Hz, 1H), 7.20-7.32 (m, 9H), 7.36-7.44 (m, 9H), 7.71 (d, *J* = 7.6 Hz, 1H), 7.80 (s, 1H), 8.39 (d, *J* = 8.0 Hz, 1H), 11.36 (br s, 1H); <sup>13</sup>C NMR (CDCl<sub>3</sub>, 100 MHz) δ: 73.9, 75.5, 117.6, 117.9, 119.1, 123.2, 124.4, 125.4, 126.0, 126.1, 126.2, 126.3, 127.1, 128.1, 128.6, 128.9, 130.2, 133.9, 135.0, 136.1, 152.8, 156.6, 161.2, 193.5, eight carbons missing in the aromatic region; HRMS (ESI-TOF) *m/z*: Calcd. for C<sub>36</sub>H<sub>27</sub>N<sub>2</sub>O<sub>3</sub> [M+H]<sup>+</sup>: 535.2016; Found: 535.2018.

### 11. Gram scale synthesis of the product 4a

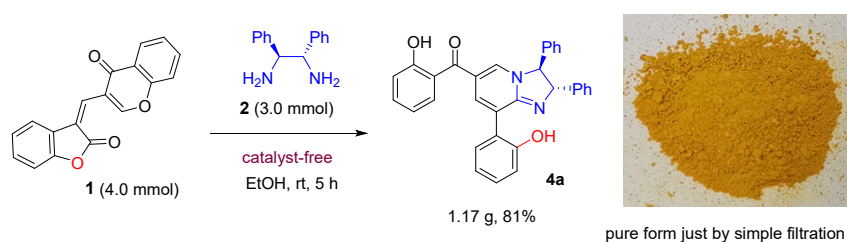

In a sealed tube equipped with a magnetic stirring bar, to 15 mL of EtOH was added 3-vinyl benzofuranone-chromone **1** (4.0 mmol) and the chiral 1,2-diphenylethylenediamine **2** (3.0 mmol). The reaction mixture was stirred at rt for 5 h. After completion of the reaction, as indicated by TLC, the reaction product was filtered, washed with EtOH to afford pure product **4a** (1.17 g, 81% yield).

### 12. Application of optically active imidazole derivative 4a

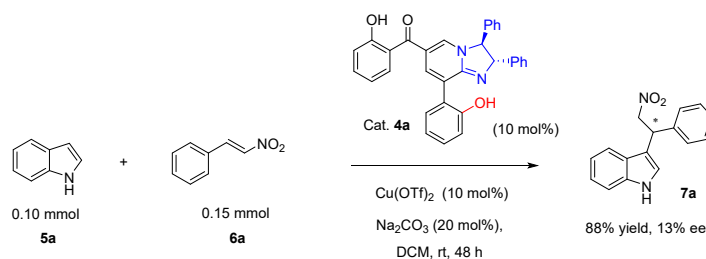

A mixture of **5a** (0.10 mmol), **6a** (0.15 mmol), **4a** (10 mol%, 0.01 mmol) and Na<sub>2</sub>CO<sub>3</sub> (20 mol%, 0.02 mmol) in 1.0 mL of DCM was stirred at reflux for 48 h. After completion of the reaction, as indicated by TLC, the mixture was purified by flash chromatography (hexane/EtOAc, 8/1, v/v) to afford the corresponding product **7a** (23.4 mg, 88% yield, 13% ee).

**3-(2-nitro-1-phenylethyl)-1H-indole (7a):** <sup>1</sup>H NMR (CDCl<sub>3</sub>, 400 MHz) δ: 4.77-4.82 (m, 1H),

4.89-4.94 (m, 1H), 5.04-5.08 (m, 1H), 6.82 (d,  $J = 2.0$  Hz, 1H), 6.94-6.98 (m, 1H), 7.06-7.10 (m, 1H), 7.13-7.16 (m, 1H), 7.17-7.22 (m, 5H), 7.33 (d,  $J = 8.0$  Hz, 1H), 7.89 (br s, 1H);  $^{13}\text{C}$  NMR ( $\text{CDCl}_3$ , 100 MHz)  $\delta$ : 40.5, 78.5, 110.4, 113.2, 117.8, 118.9, 120.6, 121.6, 125.0, 126.5, 126.7, 127.9, 135.4, 138.2, two carbons missing in the aromatic region; HRMS (ESI-TOF)  $m/z$ : Calcd. for  $\text{C}_{16}\text{H}_{14}\text{N}_2\text{NaO}_2$   $[\text{M}+\text{Na}]^+$ : 289.0947; Found: 289.0953; The chiral column and the method for HPLC analysis: using a Chiralpak IC column (85/15 hexane/*i*-PrOH; flow rate: 1.0 mL/min;  $\lambda = 254$  nm;  $\tau = 6.41$  min;  $\tau = 7.34$  min).

### 13. Figure S1: new species detected by ESI-MS analysis.

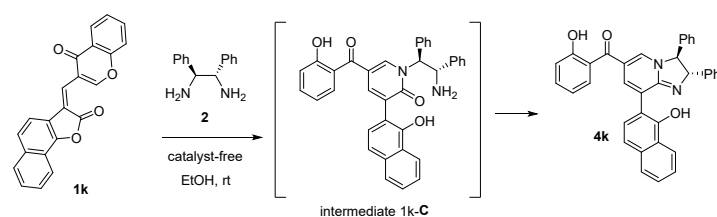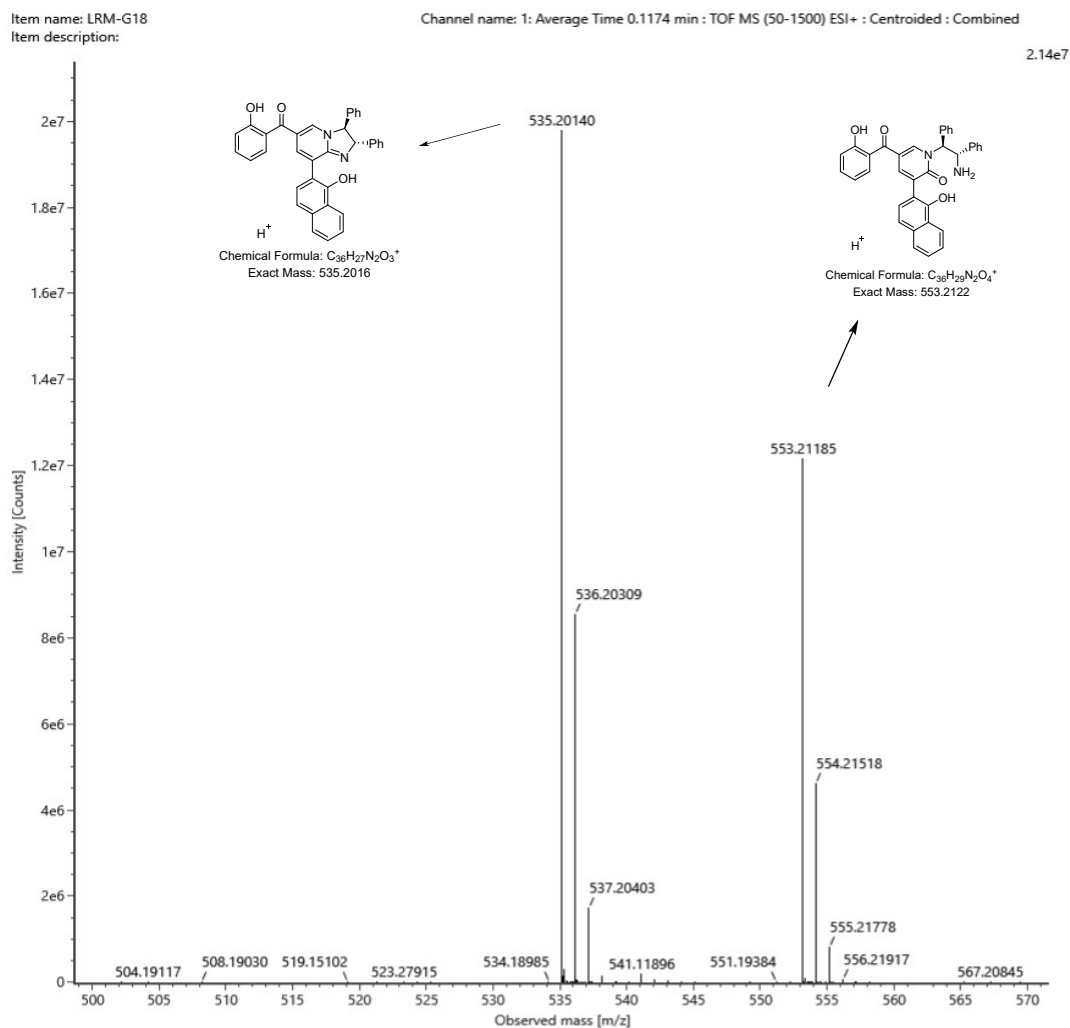

## 14. X-ray crystal data for compounds 3ba, 4c and 4e

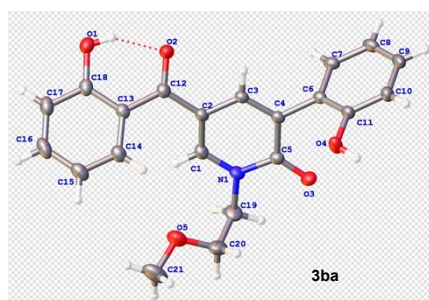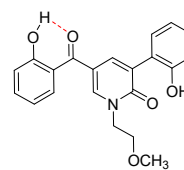

3ba

**Table S2 Crystal data and structure refinement for 3ba**

|                                             |                                                               |
|---------------------------------------------|---------------------------------------------------------------|
| Identification code                         | <b>3ba</b>                                                    |
| Empirical formula                           | C <sub>21</sub> H <sub>19</sub> NO <sub>5</sub>               |
| Formula weight                              | 365.37                                                        |
| Temperature/K                               | 199.99(10)                                                    |
| Crystal system                              | orthorhombic                                                  |
| Space group                                 | Pca2 <sub>1</sub>                                             |
| a/Å, b/Å, c/Å                               | 29.9557(10), 7.3668(2), 8.1504(3)                             |
| α/°, β/°, γ/°                               | 90, 90, 90.                                                   |
| Volume/Å <sup>3</sup>                       | 1798.61(10)                                                   |
| Z                                           | 4                                                             |
| ρ <sub>calc</sub> /cm <sup>3</sup>          | 1.349                                                         |
| μ/mm <sup>-1</sup>                          | 0.799                                                         |
| F(000)                                      | 768.0                                                         |
| Radiation                                   | Cu Kα (λ = 1.54184)                                           |
| Crystal size/mm <sup>3</sup>                | 0.14 × 0.11 × 0.09                                            |
| 2θ range for data collection/°              | 5.9 to 146.848                                                |
| Index ranges                                | -33 ≤ h ≤ 36, -9 ≤ k ≤ 7, -9 ≤ l ≤ 5                          |
| Reflections collected                       | 4152                                                          |
| Independent reflections                     | 2419 [R <sub>int</sub> = 0.0246, R <sub>sigma</sub> = 0.0270] |
| Data/restraints/parameters                  | 2419/1/257                                                    |
| Goodness-of-fit on F <sup>2</sup>           | 1.072                                                         |
| Final R indexes [I ≥ 2σ(I)]                 | R <sub>1</sub> = 0.0355, wR <sub>2</sub> = 0.0915             |
| Final R indexes [all data]                  | R <sub>1</sub> = 0.0400, wR <sub>2</sub> = 0.0943             |
| Largest diff. peak/hole / e Å <sup>-3</sup> | 0.21/-0.15                                                    |
| Flack parameter                             | 0.2(4)                                                        |

**Crystal Data** for C<sub>21</sub>H<sub>19</sub>NO<sub>5</sub> (*M* = 365.37 g/mol): orthorhombic, space group Pca2<sub>1</sub> (no. 29), *a* = 29.9557(10) Å, *b* = 7.3668(2) Å, *c* = 8.1504(3) Å, *V* = 1798.61(10) Å<sup>3</sup>, *Z* = 4, *T* = 199.99(10) K, μ(Cu Kα) = 0.799 mm<sup>-1</sup>, *D*<sub>calc</sub> = 1.349 g/cm<sup>3</sup>, 4152 reflections measured (5.9° ≤ 2θ ≤ 146.848°), 2419 unique (*R*<sub>int</sub> = 0.0246, *R*<sub>sigma</sub> = 0.0270) which were used in all calculations. The final *R*<sub>1</sub> was 0.0355 (*I* > 2σ(*I*)) and *wR*<sub>2</sub> was 0.0943 (all data).



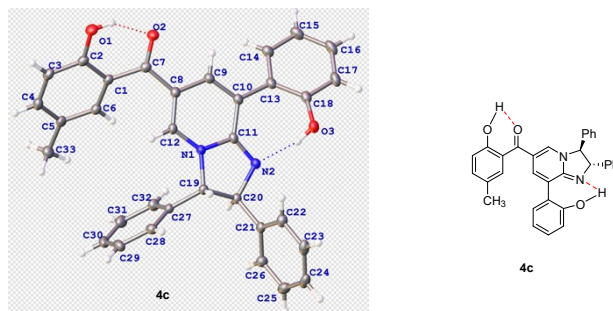

**Table S3 Crystal data and structure refinement for 4c**

|                                                      |                                                                    |
|------------------------------------------------------|--------------------------------------------------------------------|
| Identification code                                  | <b>4c</b>                                                          |
| Empirical formula                                    | $C_{33}H_{26}N_2O_3$                                               |
| Formula weight                                       | 498.56                                                             |
| Temperature/K                                        | 179.99(10)                                                         |
| Crystal system                                       | orthorhombic                                                       |
| Space group                                          | $P2_12_12_1$                                                       |
| $a/\text{\AA}$ , $b/\text{\AA}$ , $c/\text{\AA}$     | 8.58570(10), 11.06500(10), 26.4839(2)                              |
| $\alpha/^\circ$ , $\beta/^\circ$ , $\gamma/^\circ$ , | 90, 90, 90                                                         |
| Volume/ $\text{\AA}^3$                               | 2515.99(4)                                                         |
| Z                                                    | 4                                                                  |
| $\rho_{\text{calc}}/\text{cm}^3$                     | 1.316                                                              |
| $\mu/\text{mm}^{-1}$                                 | 0.674                                                              |
| F(000)                                               | 1048.0                                                             |
| Radiation                                            | Cu $K\alpha$ ( $\lambda = 1.54184$ )                               |
| Crystal size/ $\text{mm}^3$                          | $0.14 \times 0.11 \times 0.09$                                     |
| $2\theta$ range for data collection/ $^\circ$        | 6.676 to 147.754                                                   |
| Index ranges                                         | $-10 \leq h \leq 10$ , $-13 \leq k \leq 13$ , $-33 \leq l \leq 32$ |
| Reflections collected                                | 34007                                                              |
| Independent reflections                              | 5079 [ $R_{\text{int}} = 0.0432$ , $R_{\text{sigma}} = 0.0204$ ]   |
| Data/restraints/parameters                           | 5079/0/347                                                         |
| Goodness-of-fit on $F^2$                             | 1.056                                                              |
| Final R indexes [ $I \geq 2\sigma(I)$ ]              | $R_1 = 0.0285$ , $wR_2 = 0.0758$                                   |
| Final R indexes [all data]                           | $R_1 = 0.0290$ , $wR_2 = 0.0764$                                   |
| Largest diff. peak/hole / $e \text{\AA}^{-3}$        | 0.21/-0.14                                                         |
| Flack/Hoof parameter                                 | -0.01(6)/-0.01(6)                                                  |

**Crystal Data** for  $C_{33}H_{26}N_2O_3$  ( $M = 498.56$  g/mol): orthorhombic, space group  $P2_12_12_1$  (no. 19),  $a = 8.58570(10)$   $\text{\AA}$ ,  $b = 11.06500(10)$   $\text{\AA}$ ,  $c = 26.4839(2)$   $\text{\AA}$ ,  $V = 2515.99(4)$   $\text{\AA}^3$ ,  $Z = 4$ ,  $T = 179.99(10)$  K,  $\mu(\text{Cu } K\alpha) = 0.674$   $\text{mm}^{-1}$ ,  $D_{\text{calc}} = 1.316$   $\text{g/cm}^3$ , 34007 reflections measured ( $6.676^\circ \leq 2\theta \leq 147.754^\circ$ ), 5079 unique ( $R_{\text{int}} = 0.0432$ ,  $R_{\text{sigma}} = 0.0204$ ) which were used in all calculations. The final  $R_1$  was 0.0285 ( $I > 2\sigma(I)$ ) and  $wR_2$  was 0.0764 (all data).

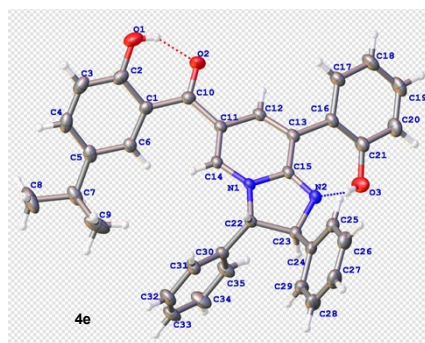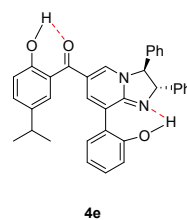

**Table S4 Crystal data and structure refinement for 4e**

|                                                      |                                                                  |
|------------------------------------------------------|------------------------------------------------------------------|
| Identification code                                  | <b>4e</b>                                                        |
| Empirical formula                                    | $C_{35}H_{30}N_2O_3$                                             |
| Formula weight                                       | 526.61                                                           |
| Temperature/K                                        | 199.99(10)                                                       |
| Crystal system                                       | monoclinic                                                       |
| Space group                                          | $P2_1$                                                           |
| $a/\text{\AA}$ , $b/\text{\AA}$ , $c/\text{\AA}$     | 11.5600(2), 7.67541(19), 16.0245(3)                              |
| $\alpha/^\circ$ , $\beta/^\circ$ , $\gamma/^\circ$ , | 90, 105.743(2), 90                                               |
| Volume/ $\text{\AA}^3$                               | 1368.48(5)                                                       |
| $Z$                                                  | 2                                                                |
| $\rho_{\text{calc}}/\text{g/cm}^3$                   | 1.278                                                            |
| $\mu/\text{mm}^{-1}$                                 | 0.647                                                            |
| $F(000)$                                             | 556.0                                                            |
| Radiation                                            | Cu $K\alpha$ ( $\lambda = 1.54184$ )                             |
| Crystal size/ $\text{mm}^3$                          | $0.15 \times 0.13 \times 0.12$                                   |
| $2\theta$ range for data collection/ $^\circ$        | 5.73 to 148.182                                                  |
| Index ranges                                         | $-14 \leq h \leq 13$ , $-9 \leq k \leq 8$ , $-19 \leq l \leq 19$ |
| Reflections collected                                | 16343                                                            |
| Independent reflections                              | 5186 [ $R_{\text{int}} = 0.0253$ , $R_{\text{sigma}} = 0.0198$ ] |
| Data/restraints/parameters                           | 5186/1/366                                                       |
| Goodness-of-fit on $F^2$                             | 1.059                                                            |
| Final $R$ indexes [ $I \geq 2\sigma(I)$ ]            | $R_1 = 0.0326$ , $wR_2 = 0.0881$                                 |
| Final $R$ indexes [all data]                         | $R_1 = 0.0331$ , $wR_2 = 0.0889$                                 |
| Largest diff. peak/hole / $e \text{\AA}^{-3}$        | 0.14/-0.15                                                       |
| Flack/Hooft parameter                                | 0.14(9)/0.17(7)                                                  |

**Crystal Data** for  $C_{35}H_{30}N_2O_3$  ( $M = 526.61$  g/mol): monoclinic, space group  $P2_1$  (no. 4),  $a = 11.5600(2)$   $\text{\AA}$ ,  $b = 7.67541(19)$   $\text{\AA}$ ,  $c = 16.0245(3)$   $\text{\AA}$ ,  $\beta = 105.743(2)^\circ$ ,  $V = 1368.48(5)$   $\text{\AA}^3$ ,  $Z = 2$ ,  $T = 199.99(10)$  K,  $\mu(\text{Cu } K\alpha) = 0.647$   $\text{mm}^{-1}$ ,  $D_{\text{calc}} = 1.278$   $\text{g/cm}^3$ , 16343 reflections measured ( $5.73^\circ \leq 2\theta \leq 148.182^\circ$ ), 5186 unique ( $R_{\text{int}} = 0.0253$ ,  $R_{\text{sigma}} = 0.0198$ ) which were used in all calculations. The final  $R_1$  was 0.0326 ( $I > 2\sigma(I)$ ) and  $wR_2$  was 0.0889 (all data).

15. The copies of  $^1\text{H}$  NMR and  $^{13}\text{C}$  NMR spectra for compounds 1, 3, 4 and 7a

$^1\text{H}$  and  $^{13}\text{C}$  NMR of 1a

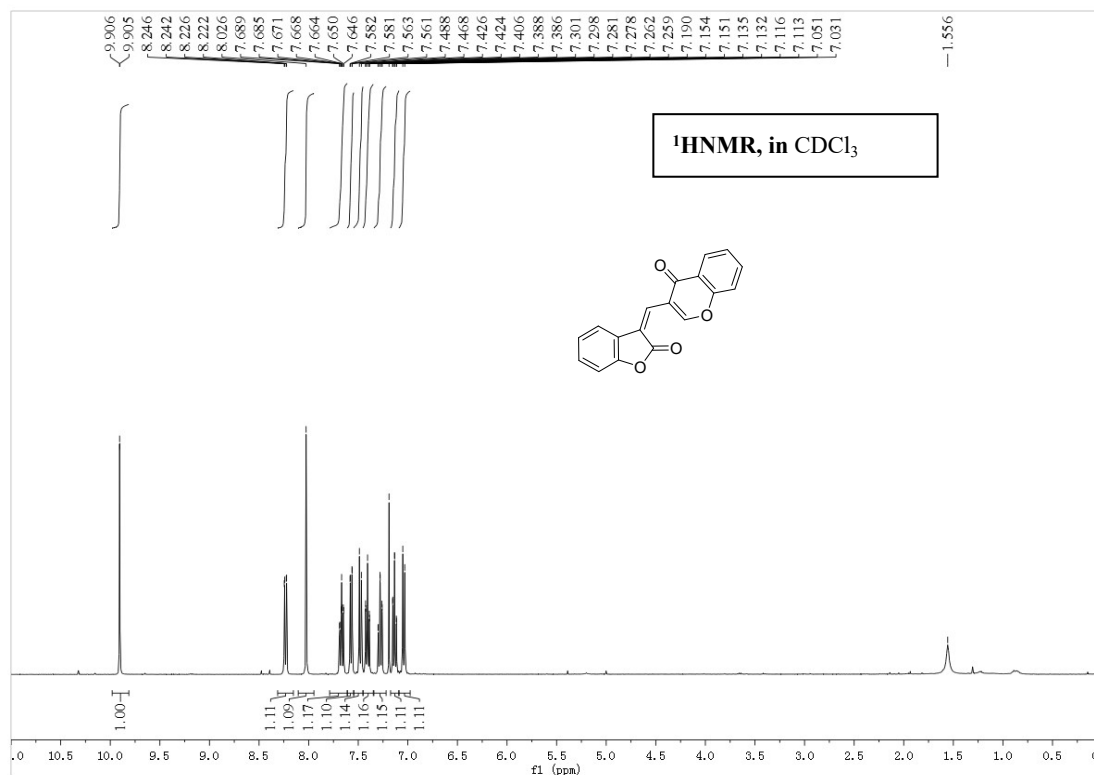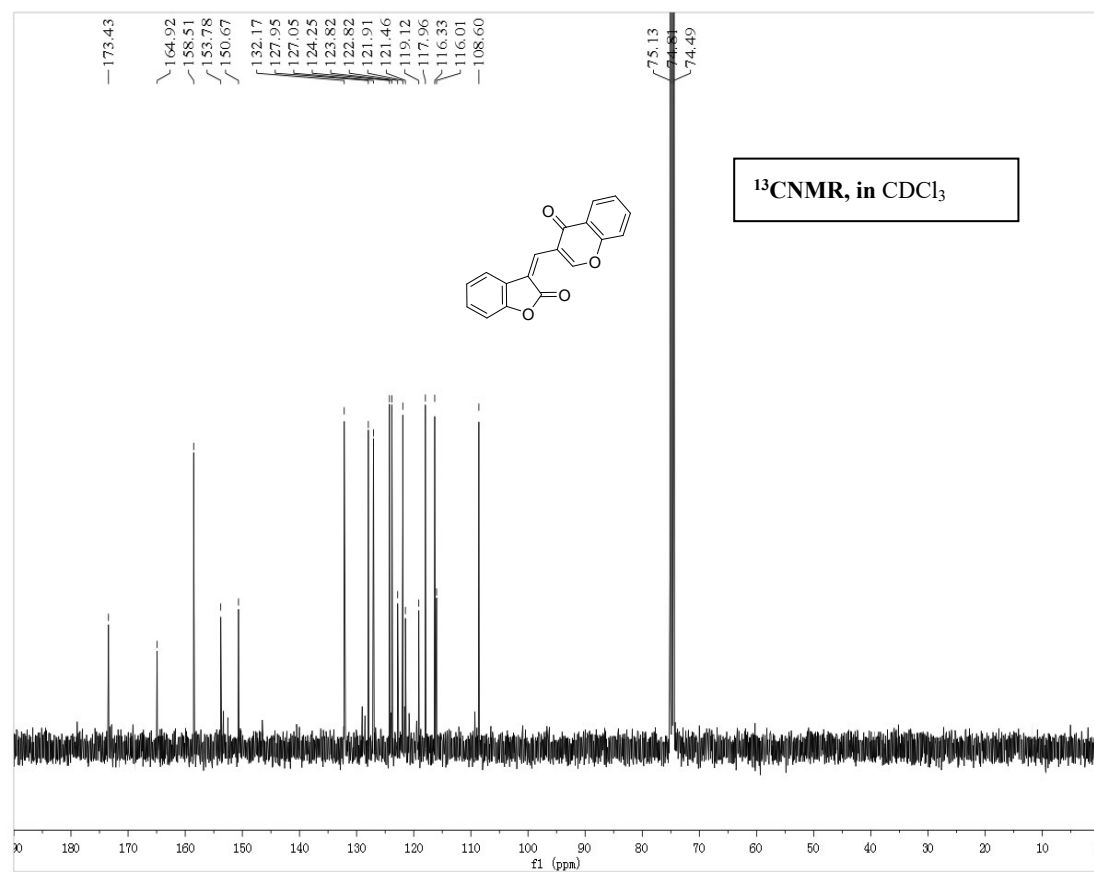

# <sup>1</sup>H and <sup>13</sup>C NMR of 1b

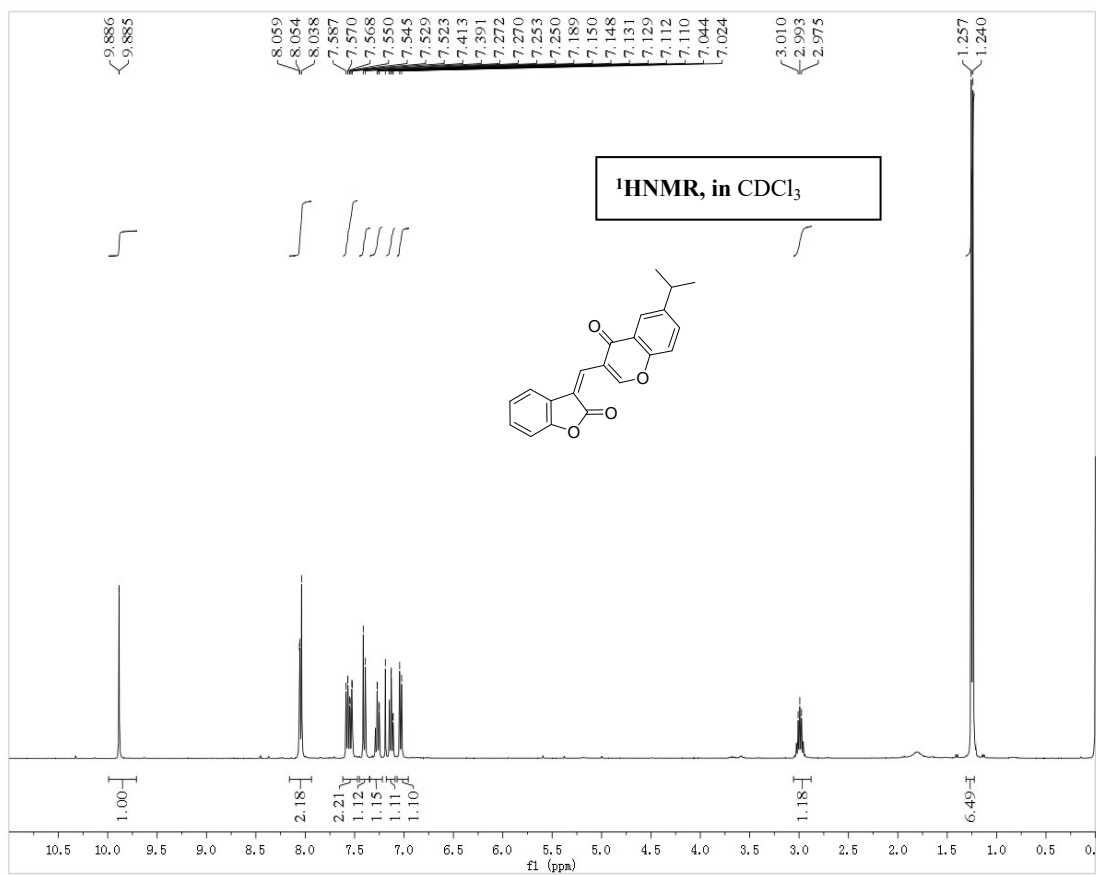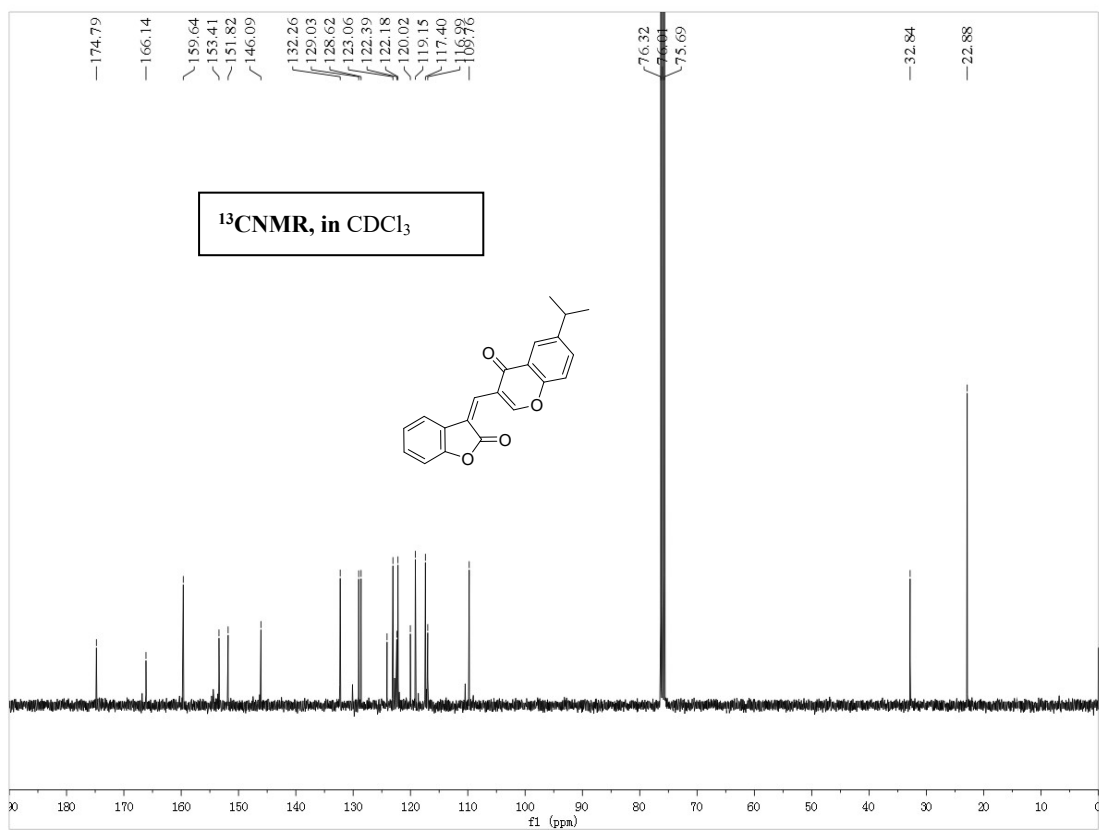

# <sup>1</sup>H and <sup>13</sup>C NMR of 1c

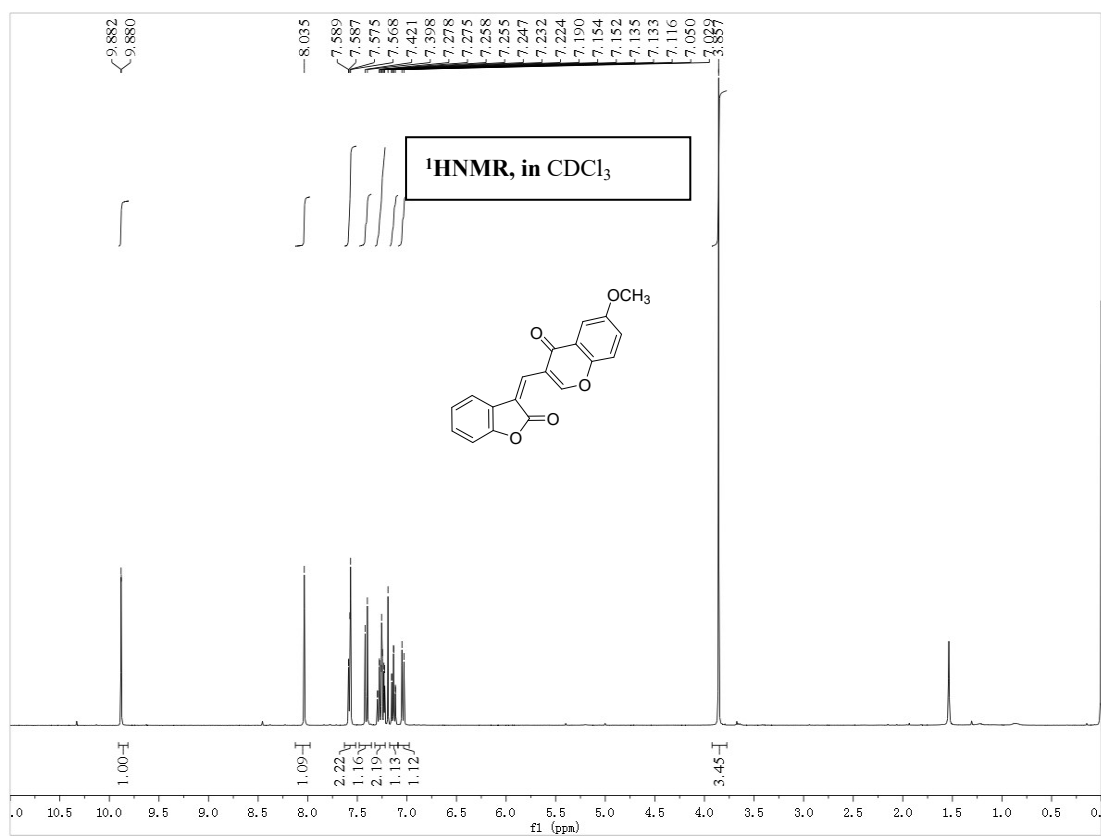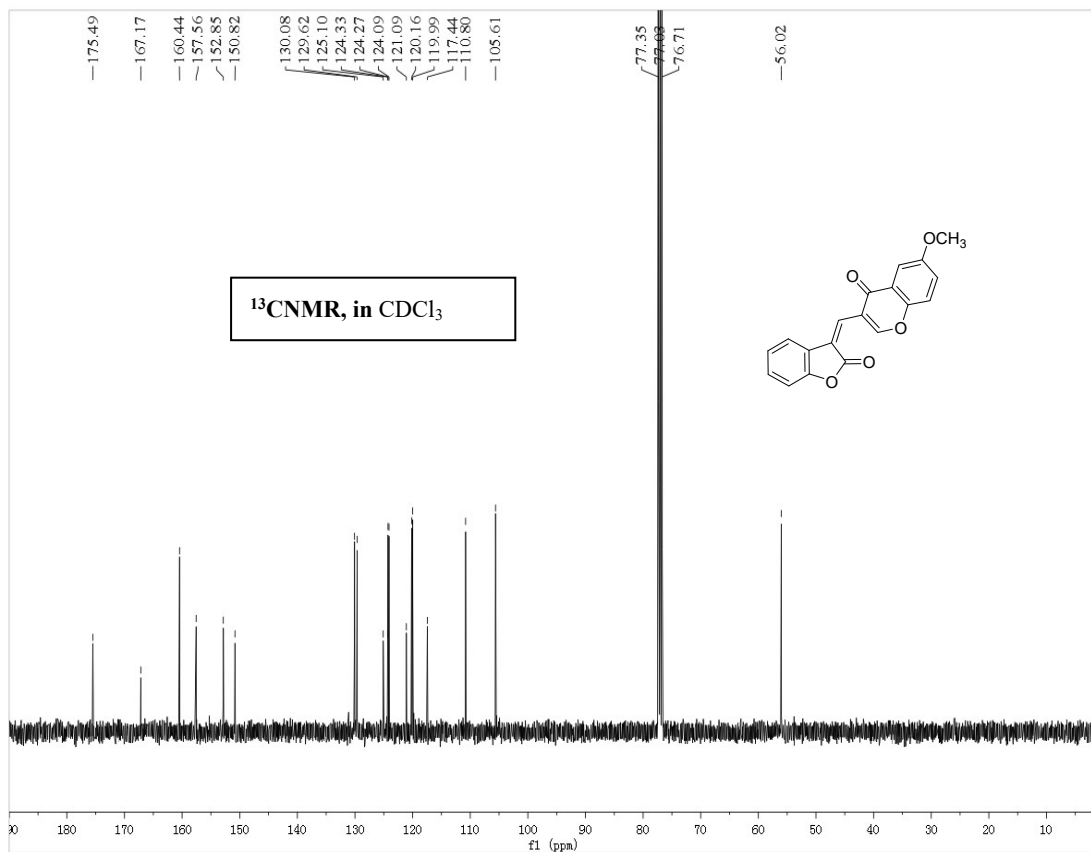

# <sup>1</sup>H and <sup>13</sup>C NMR of 3aa

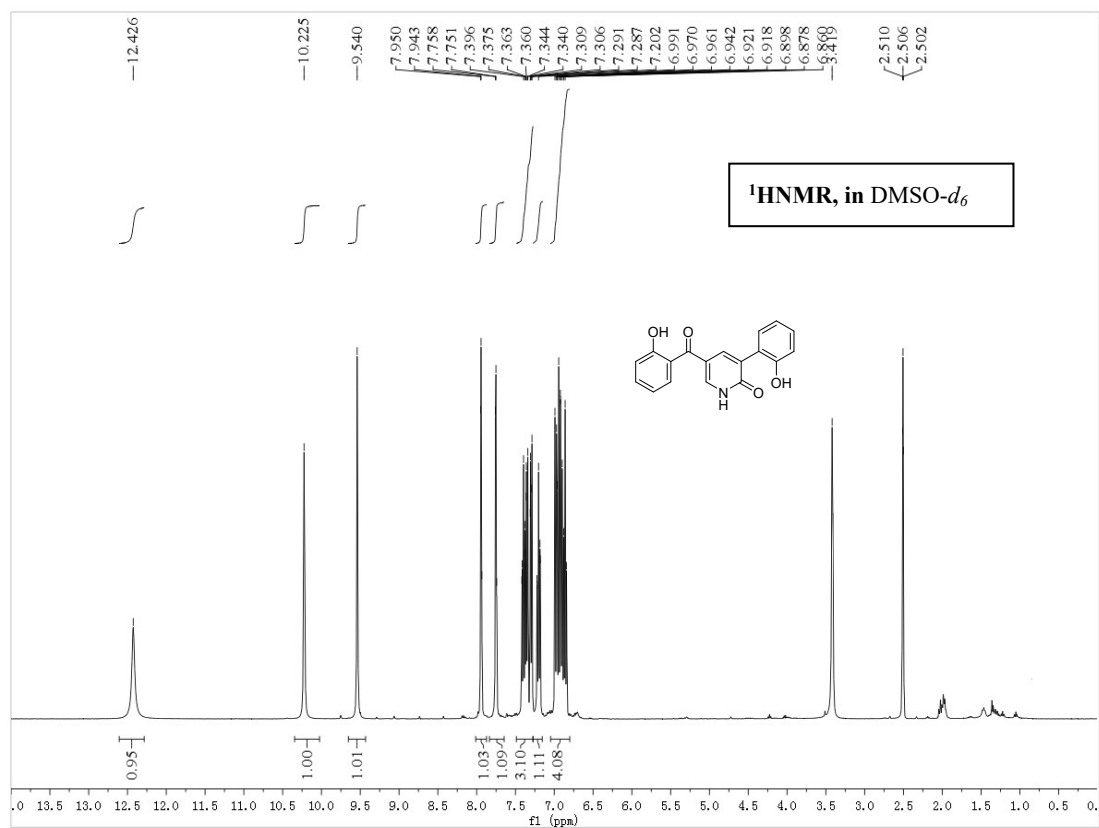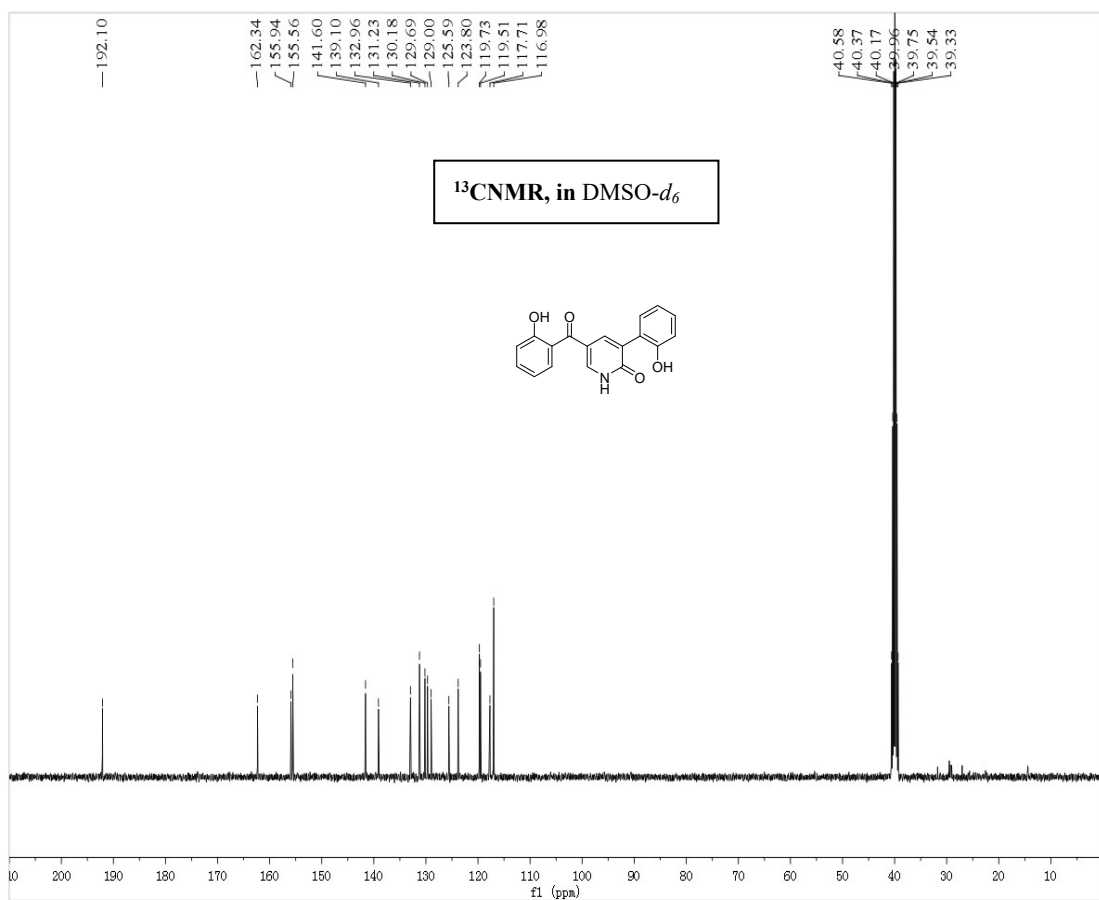

### <sup>1</sup>H and <sup>13</sup>C NMR of 3ab

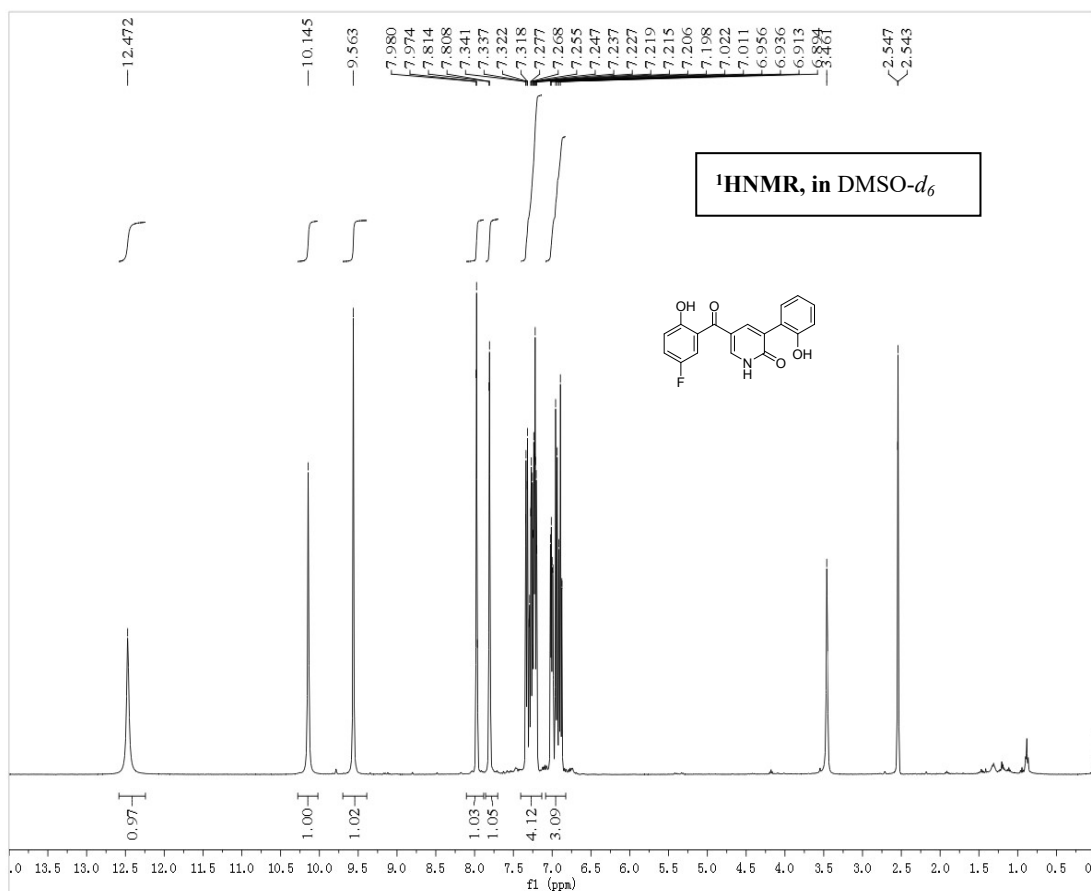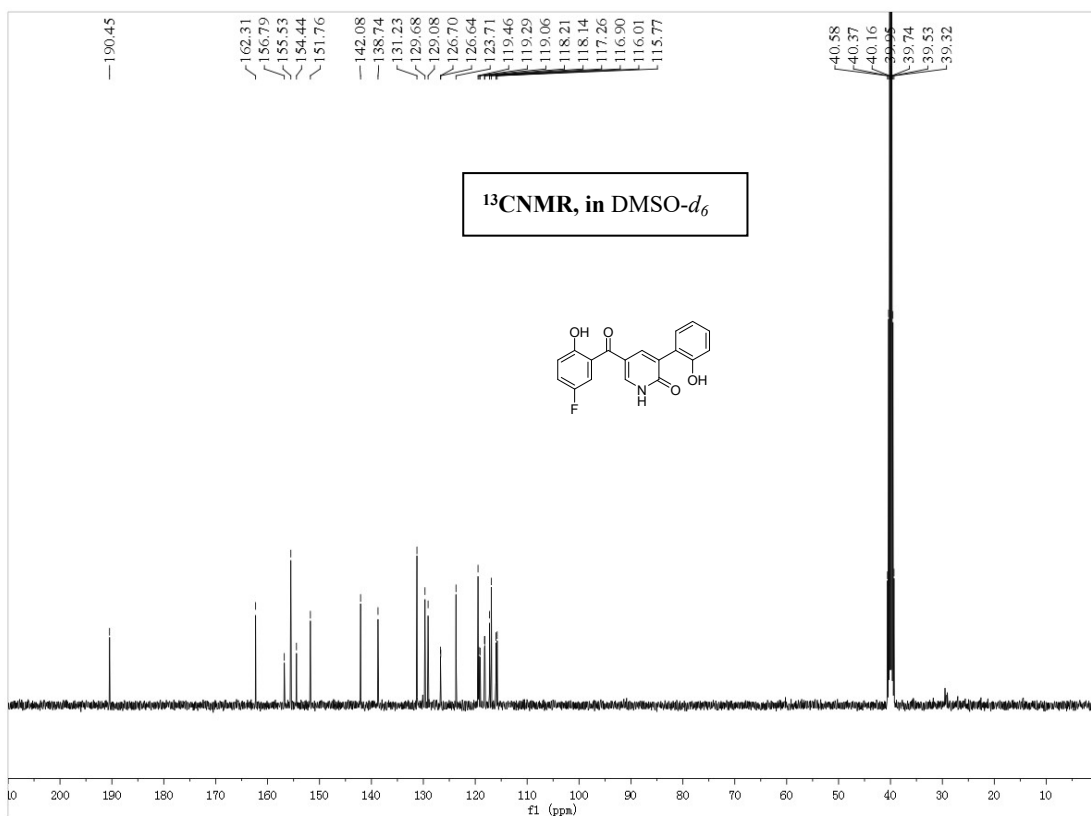

# <sup>19</sup>F NMR of 3ab

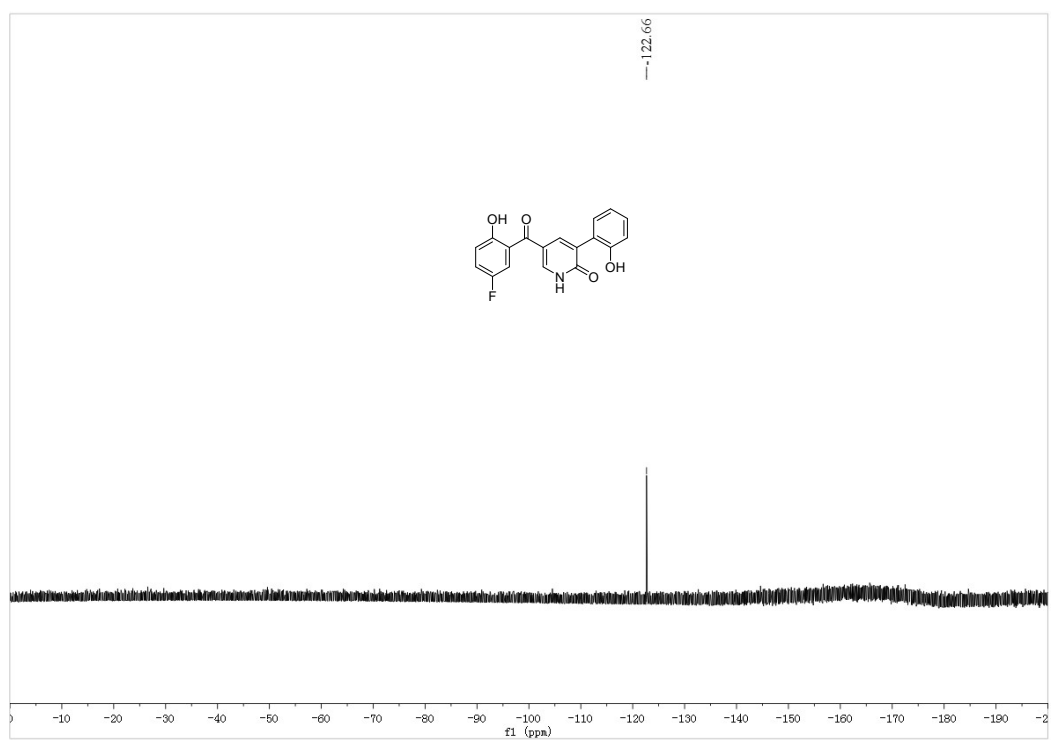



### $^1\text{H}$ and $^{13}\text{C}$ NMR of 3ac

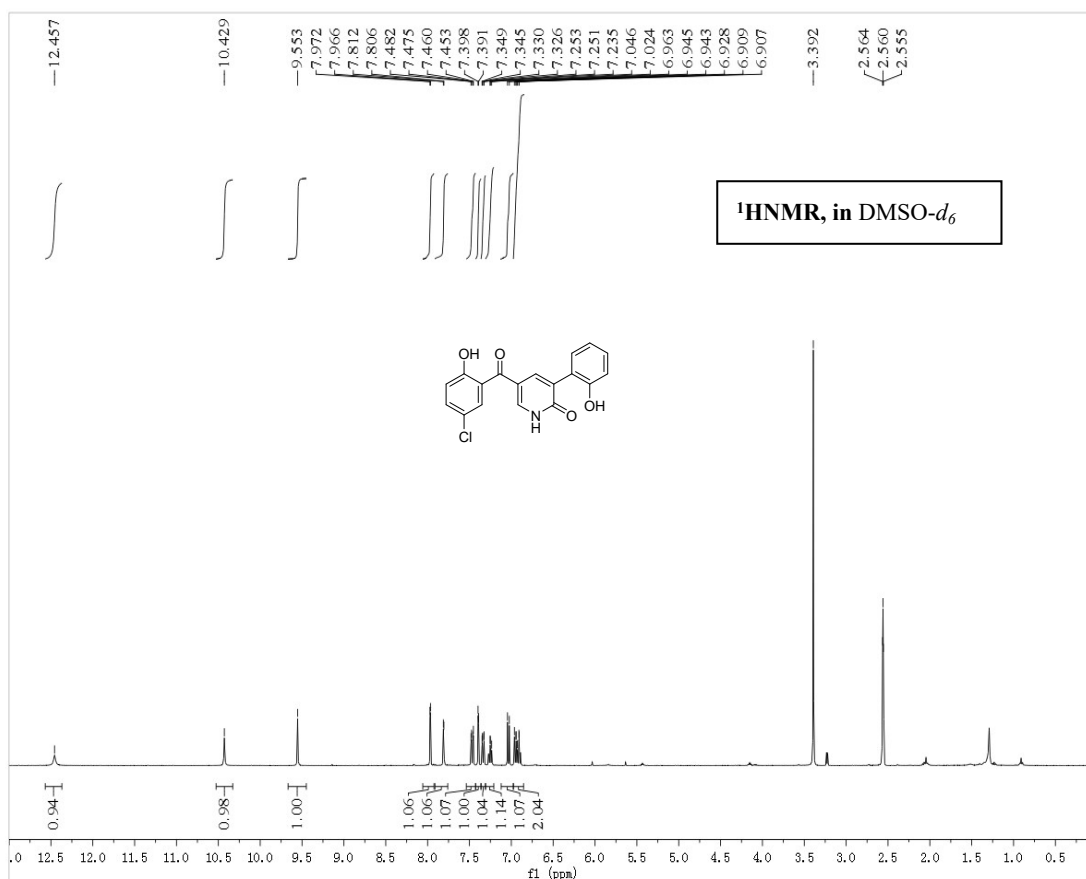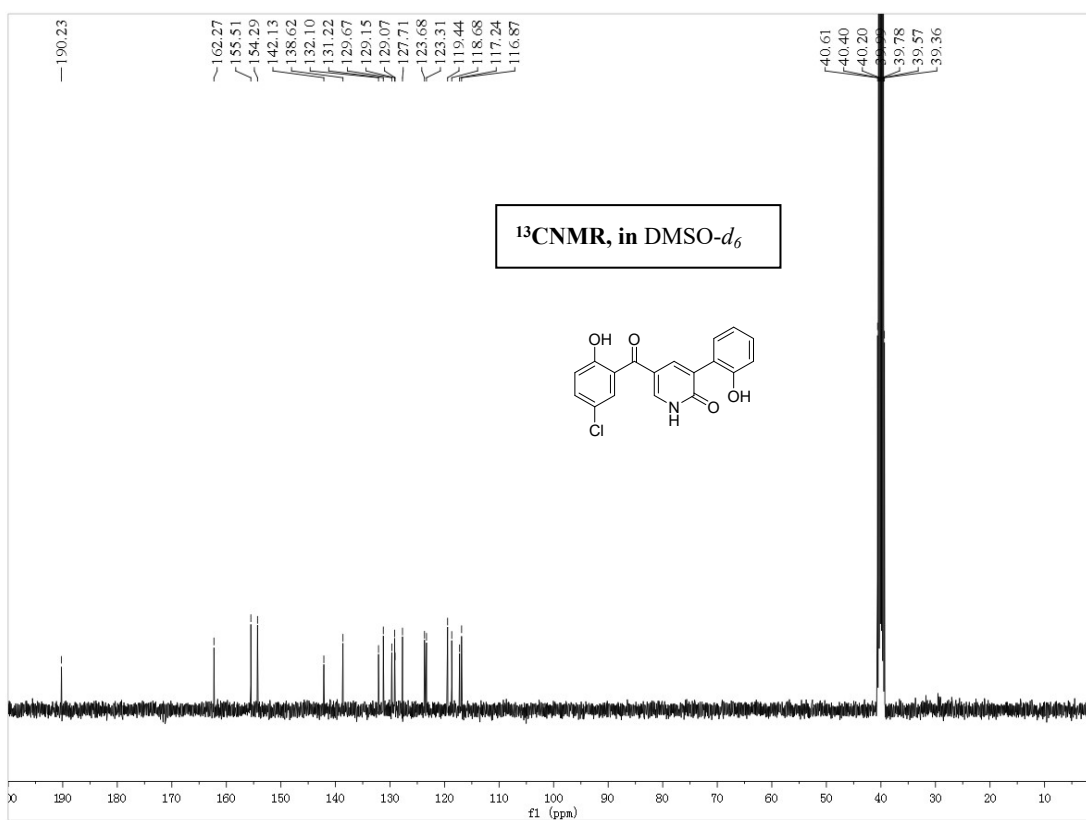

### <sup>1</sup>H and <sup>13</sup>C NMR of 3ad

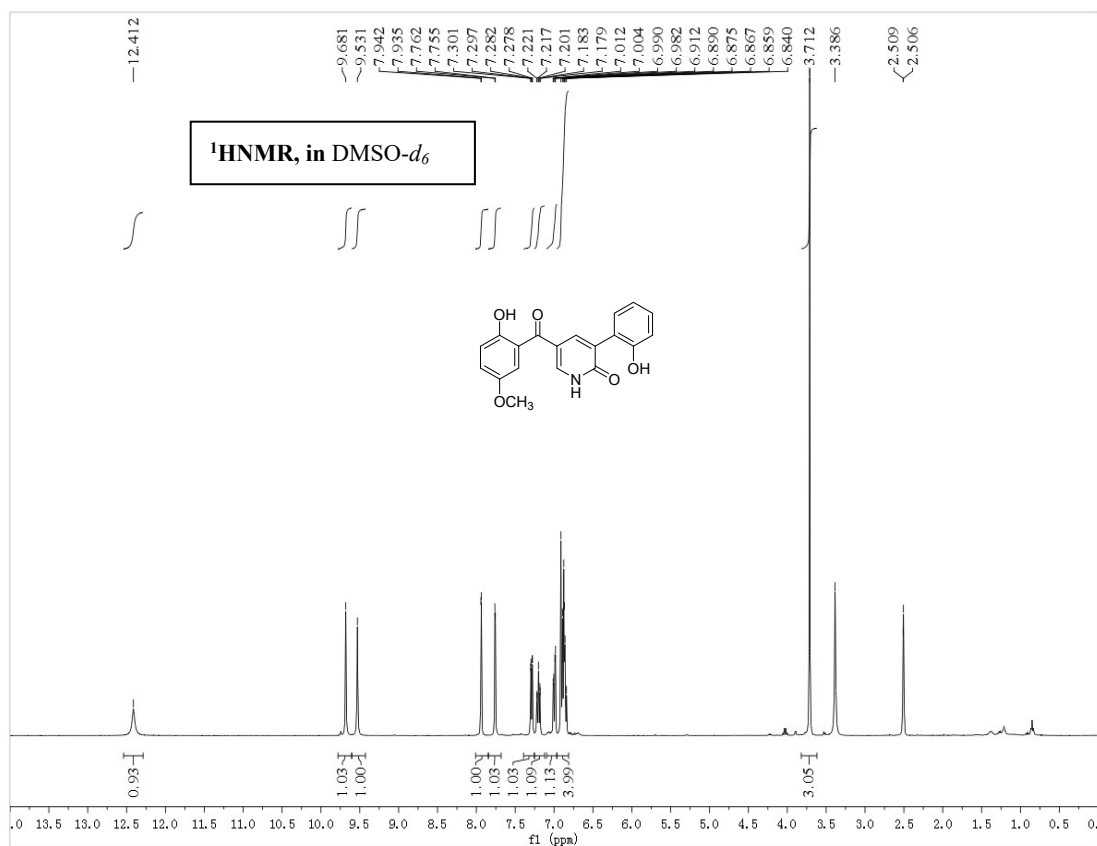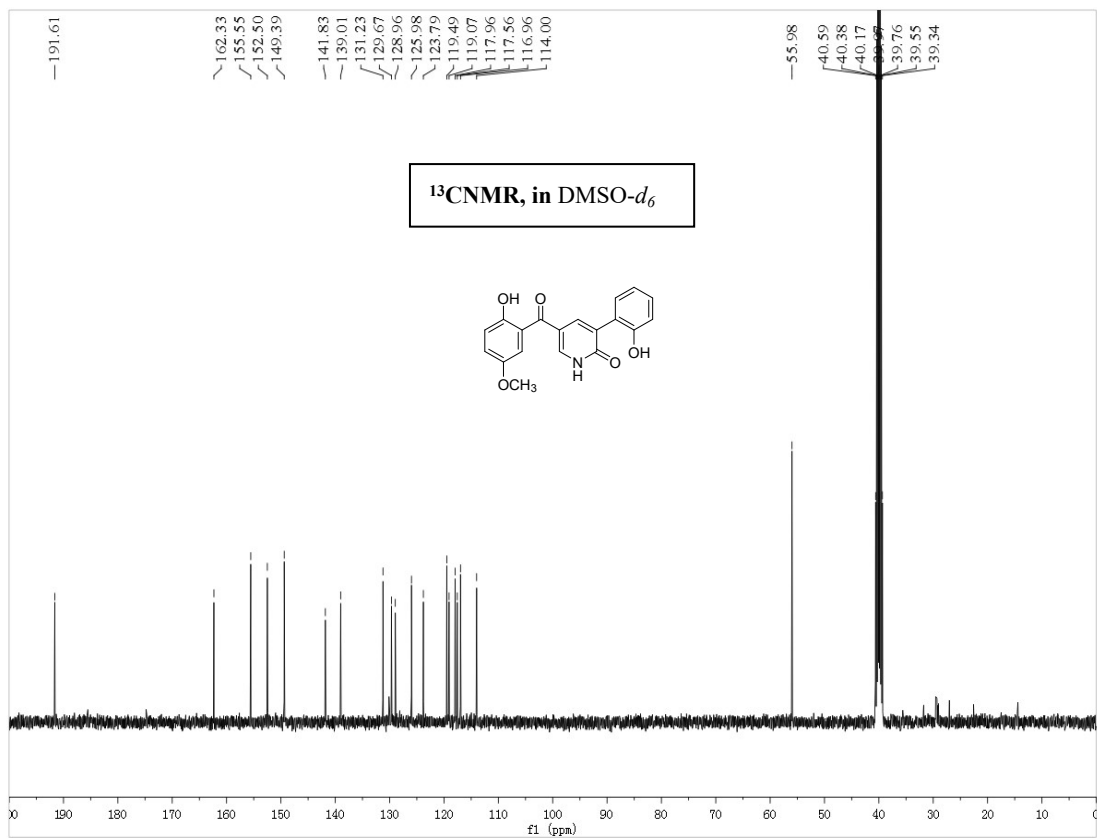

### <sup>1</sup>H and <sup>13</sup>C NMR of 3ae

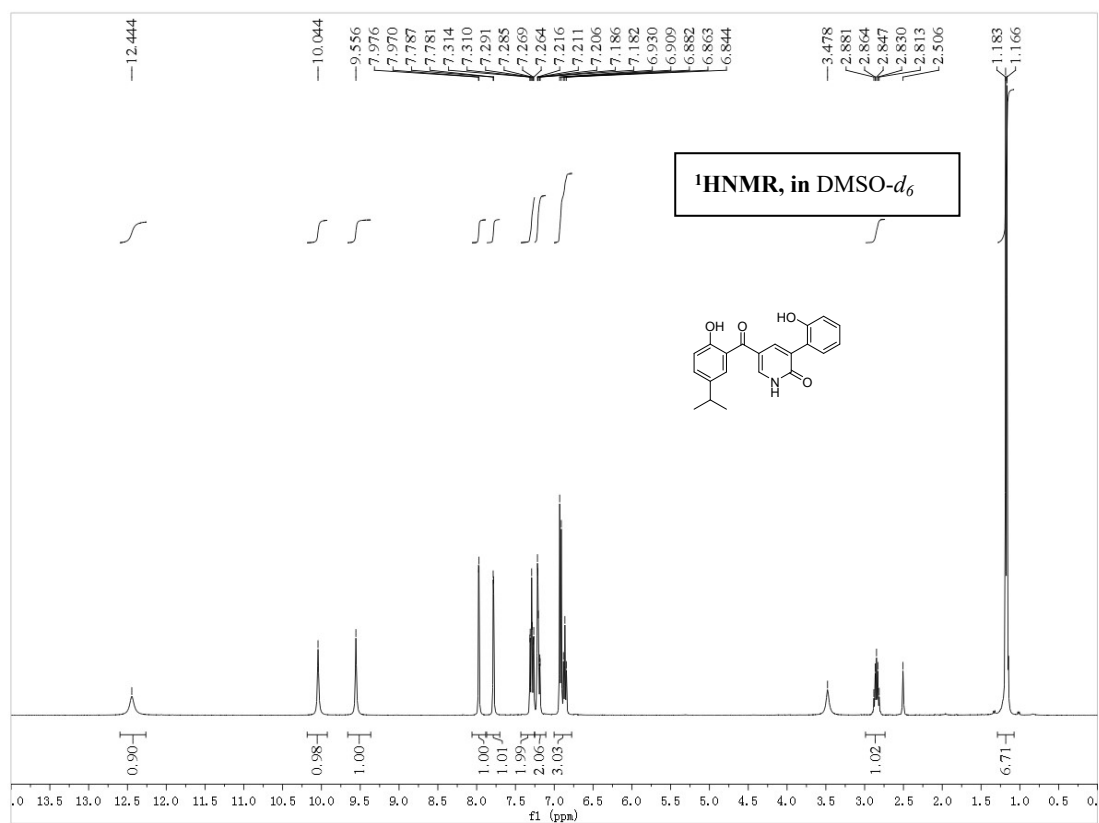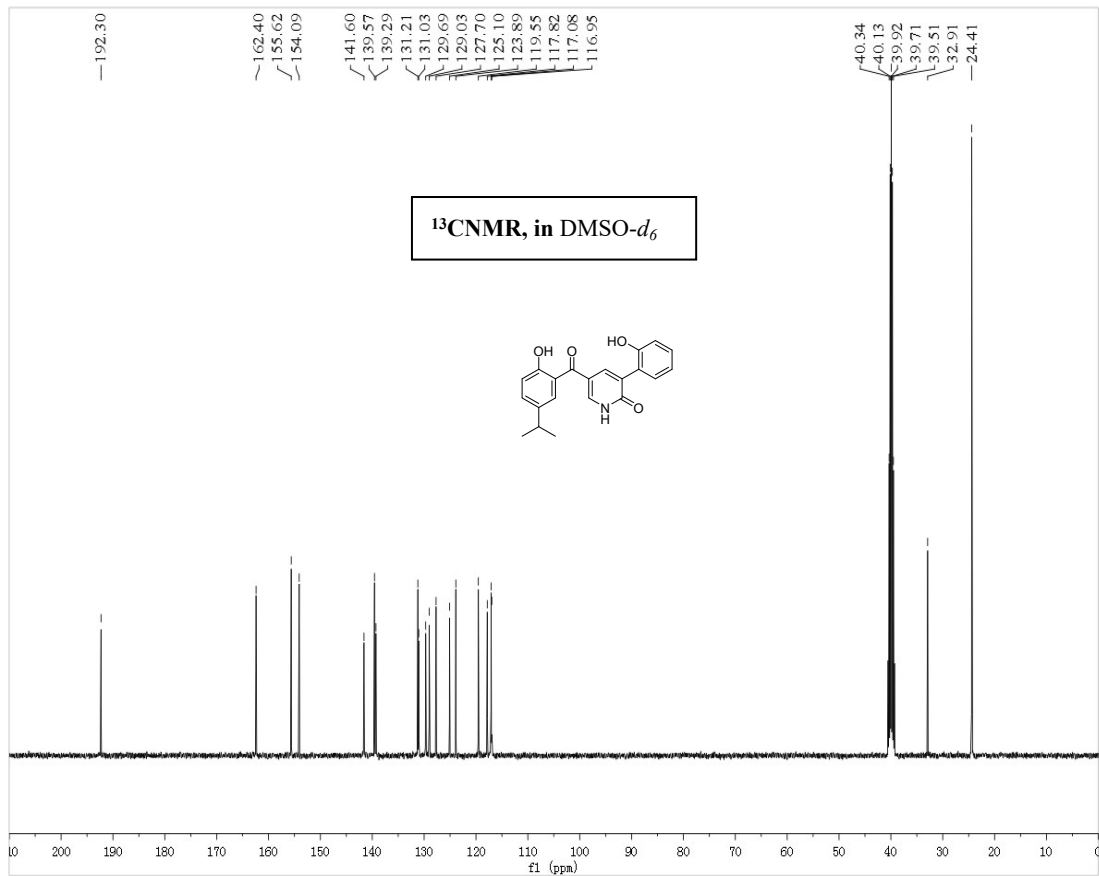



**$^{19}\text{F}$  NMR of 3af**

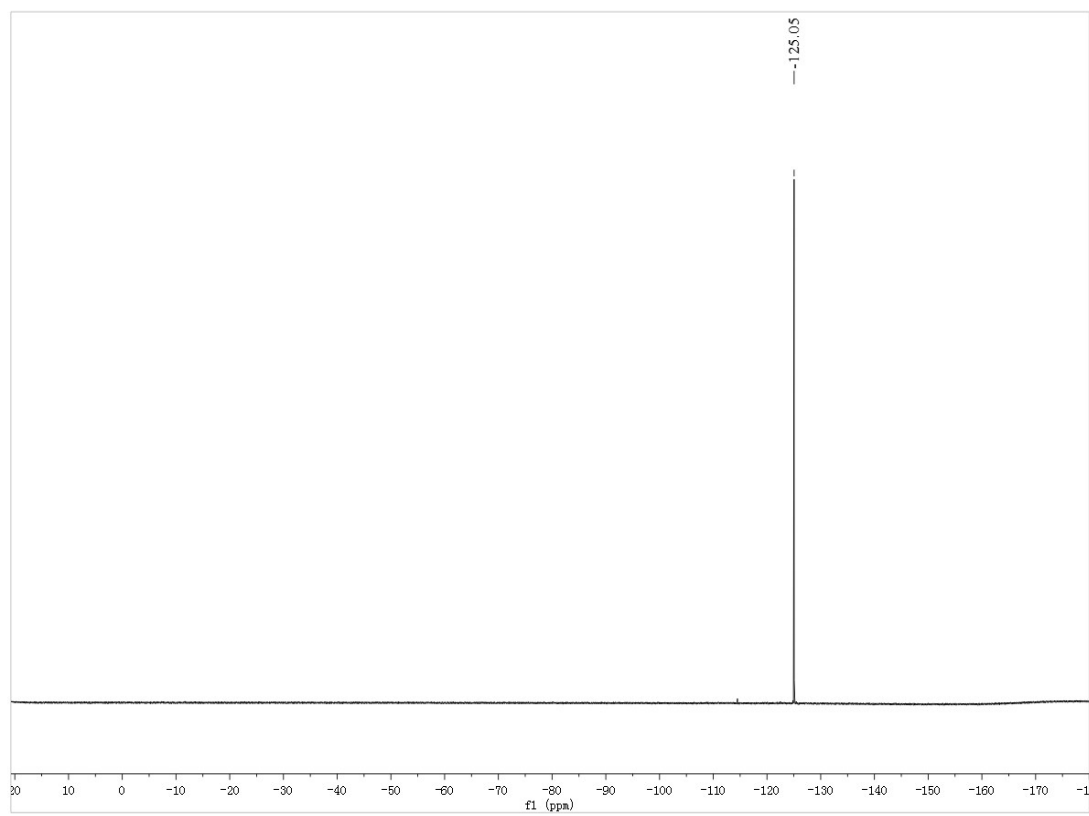

# <sup>1</sup>H and <sup>13</sup>C NMR of 3ag

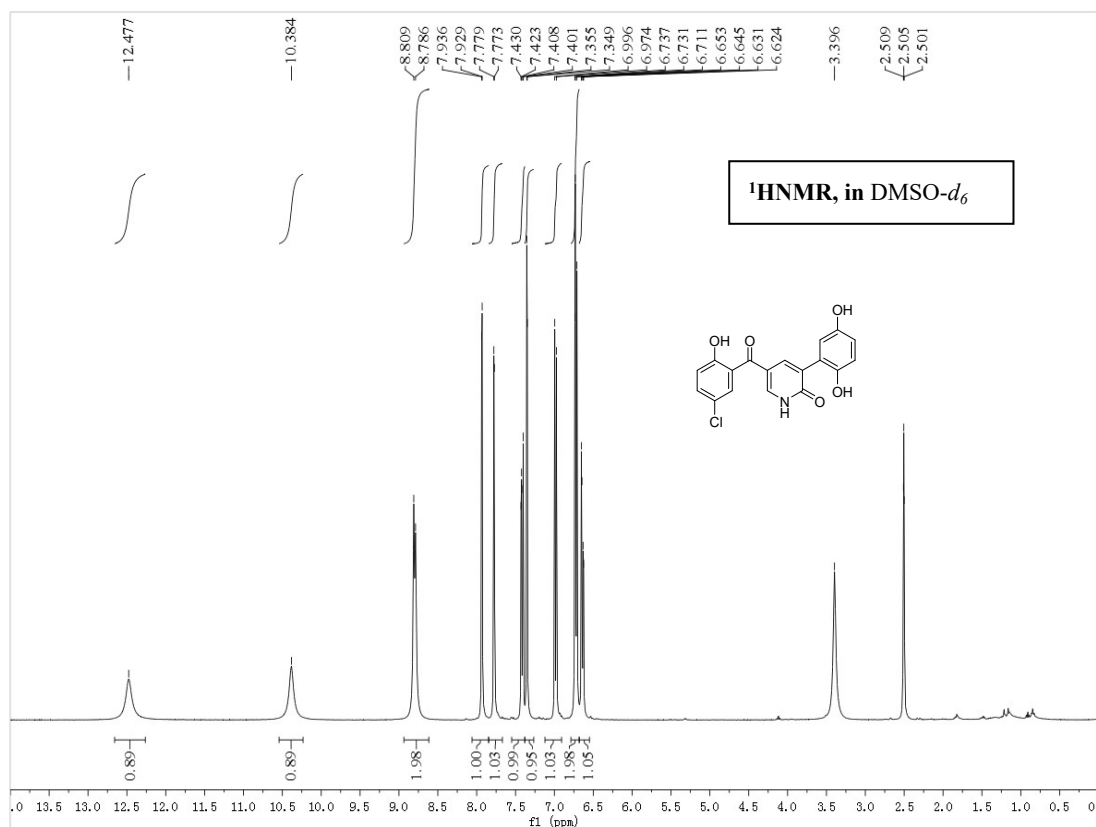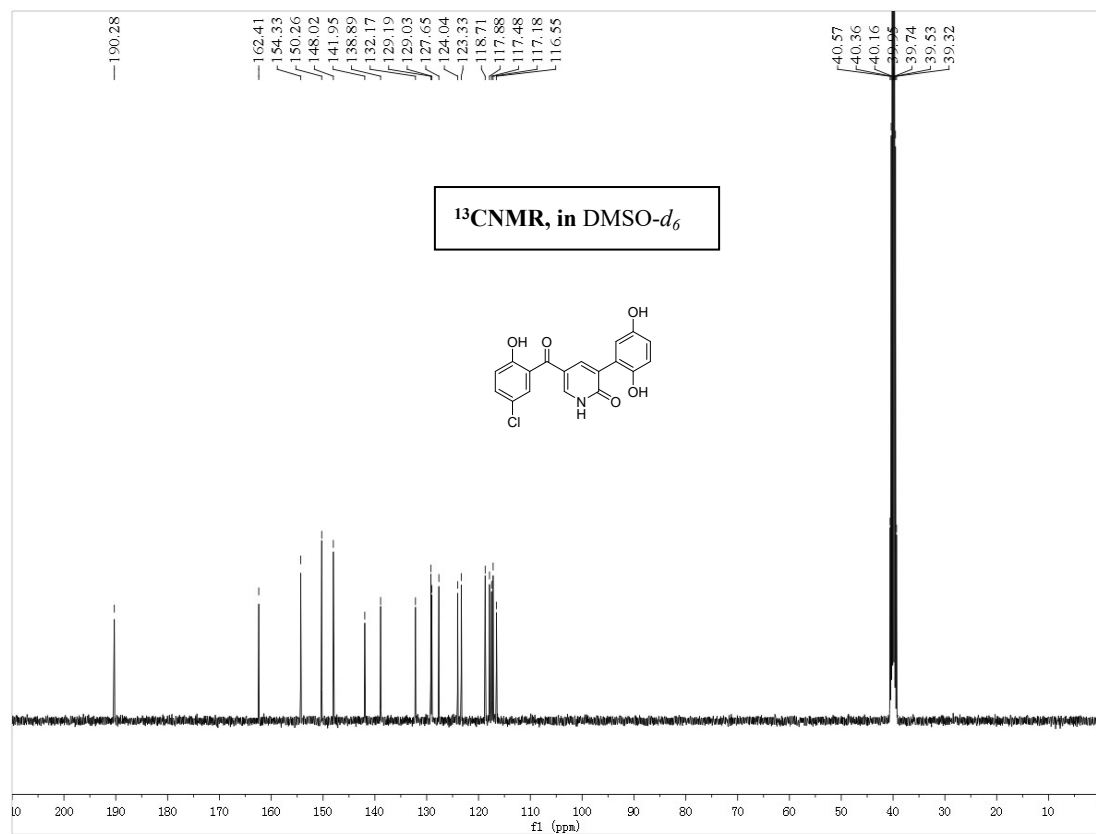

### $^1\text{H}$ and $^{13}\text{C}$ NMR of 3ba

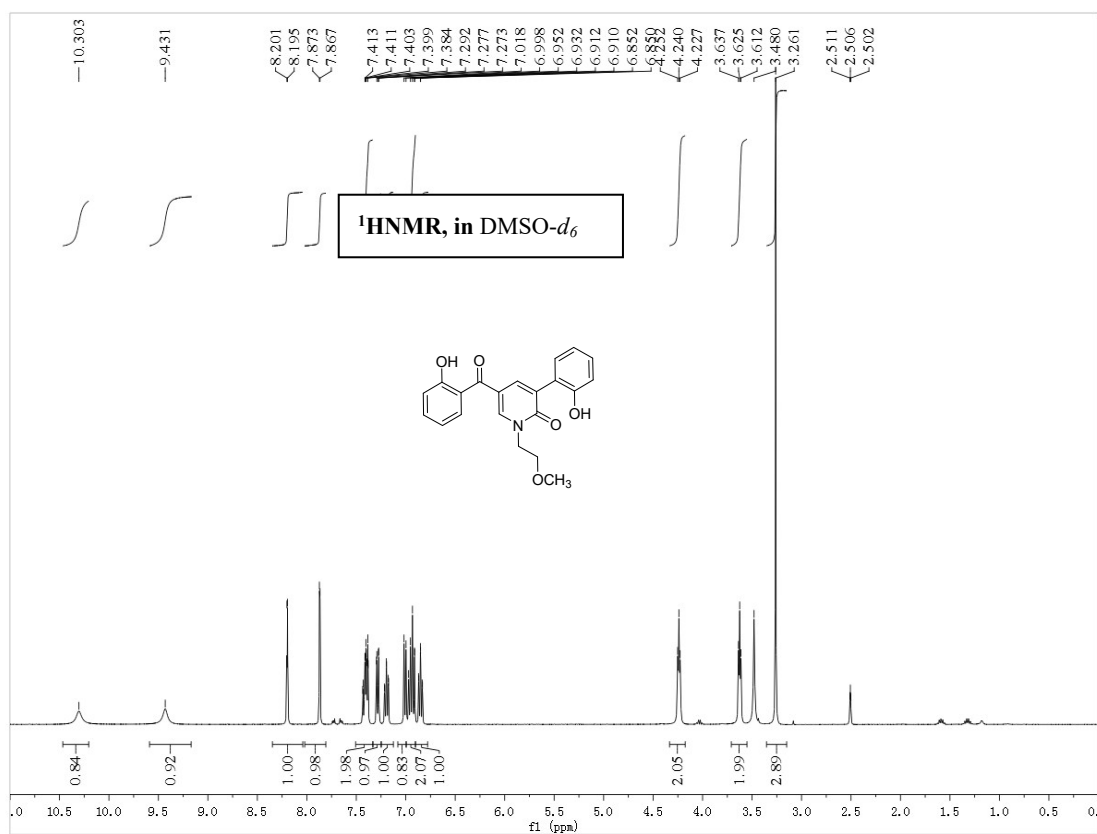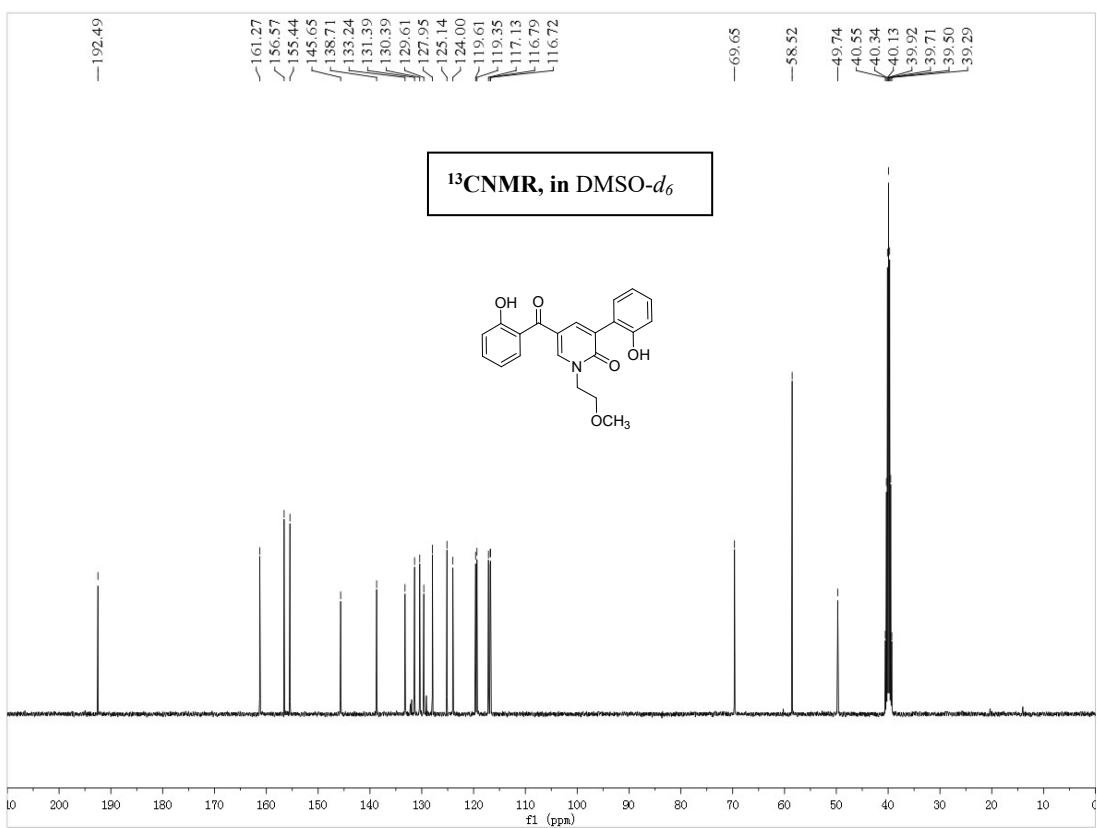

# <sup>1</sup>H and <sup>13</sup>C NMR of 3bb

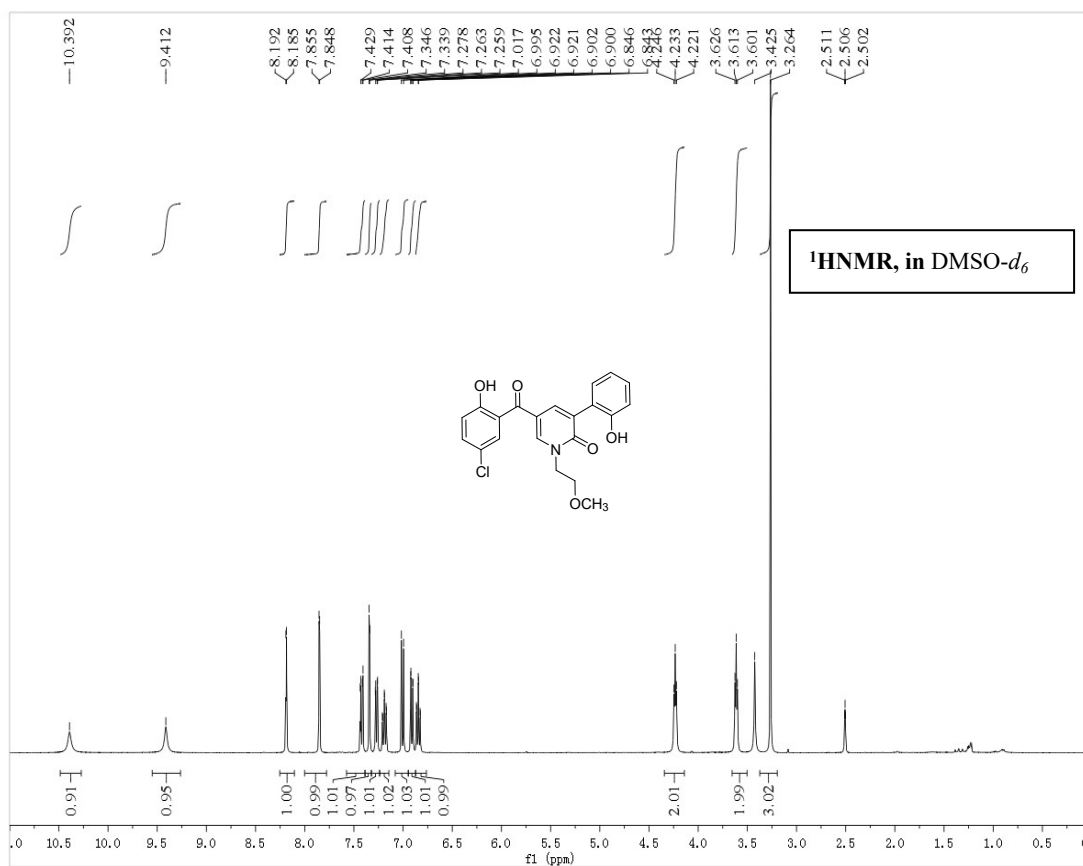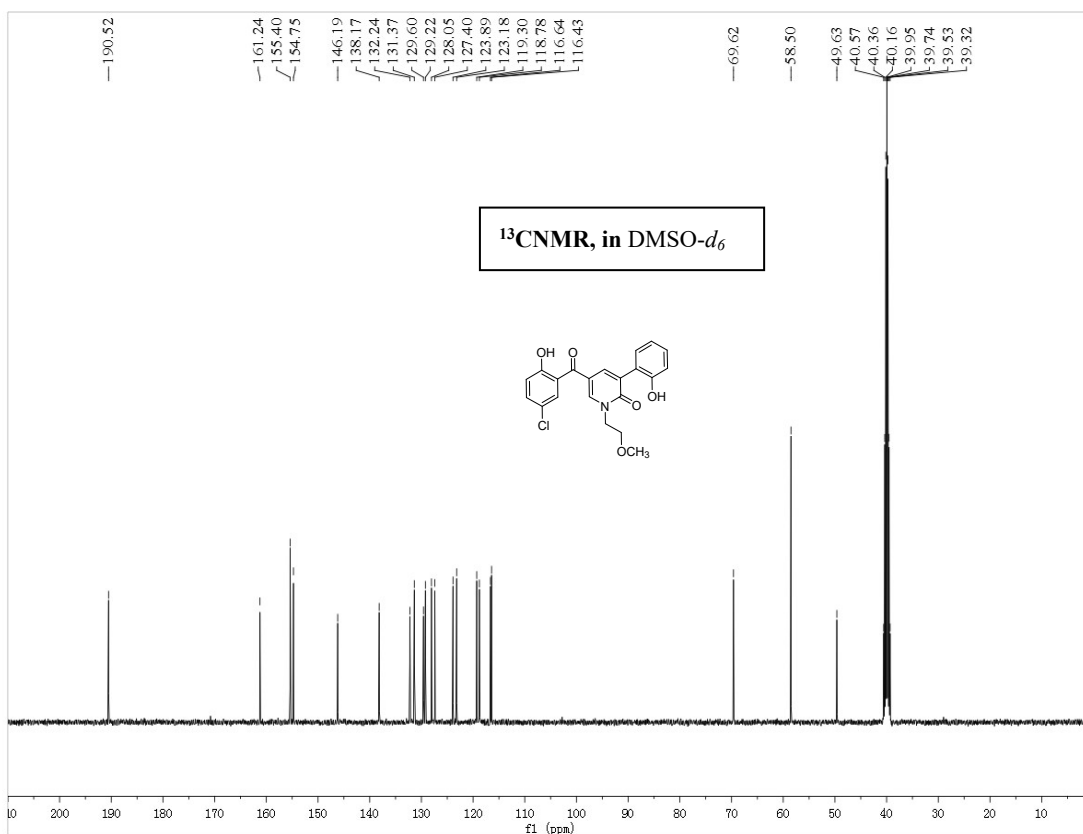



### <sup>1</sup>H and <sup>13</sup>C NMR of 3bc

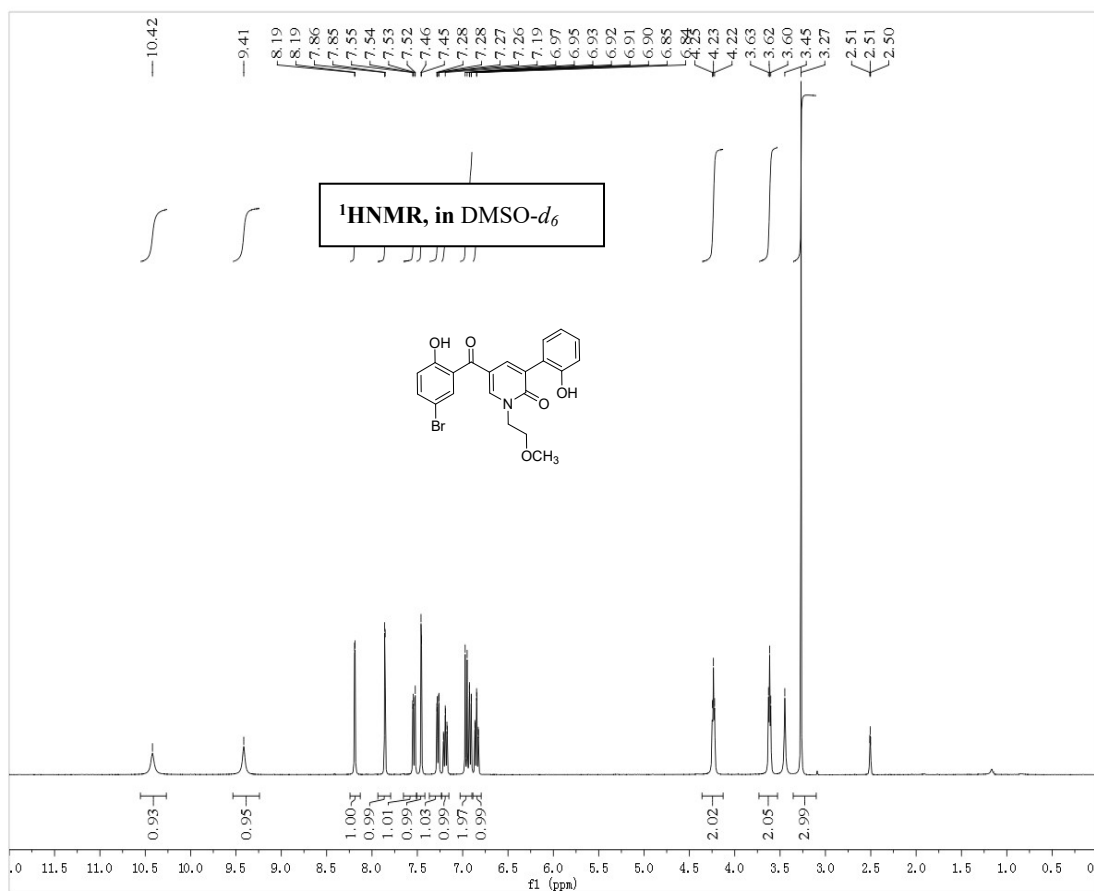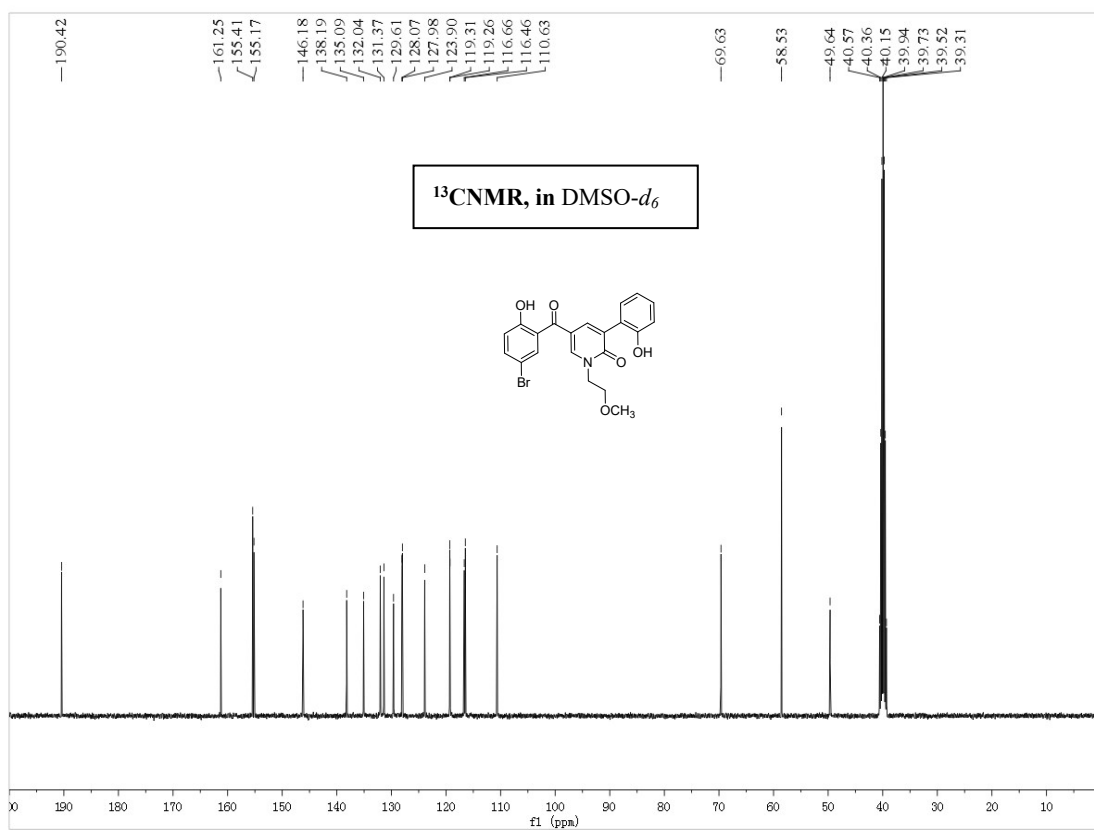

### $^1\text{H}$ and $^{13}\text{C}$ NMR of 3bd

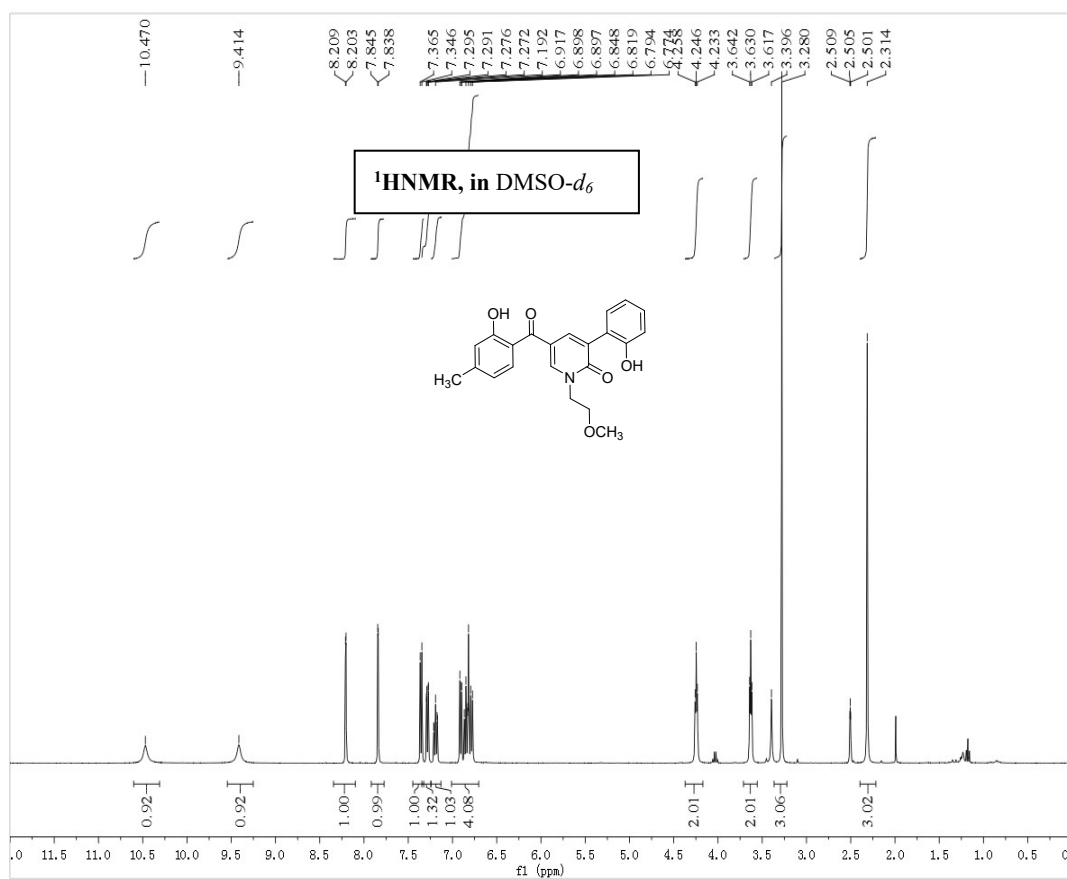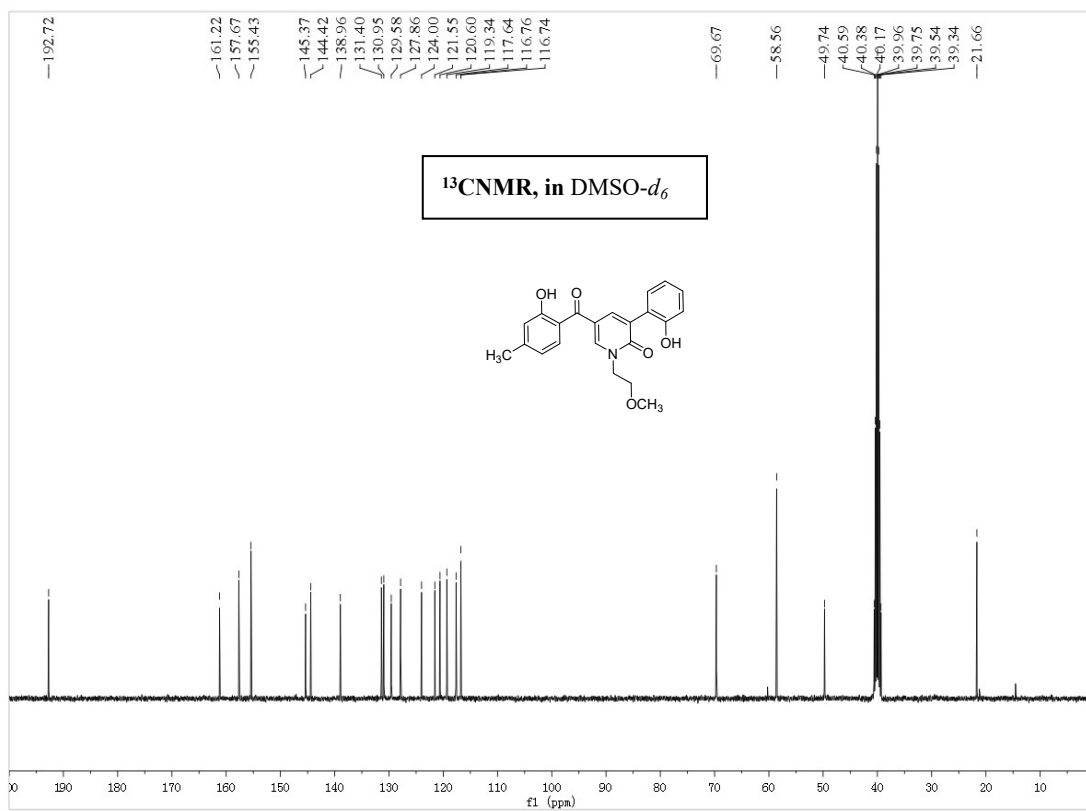

### $^1\text{H}$ and $^{13}\text{C}$ NMR of 3be

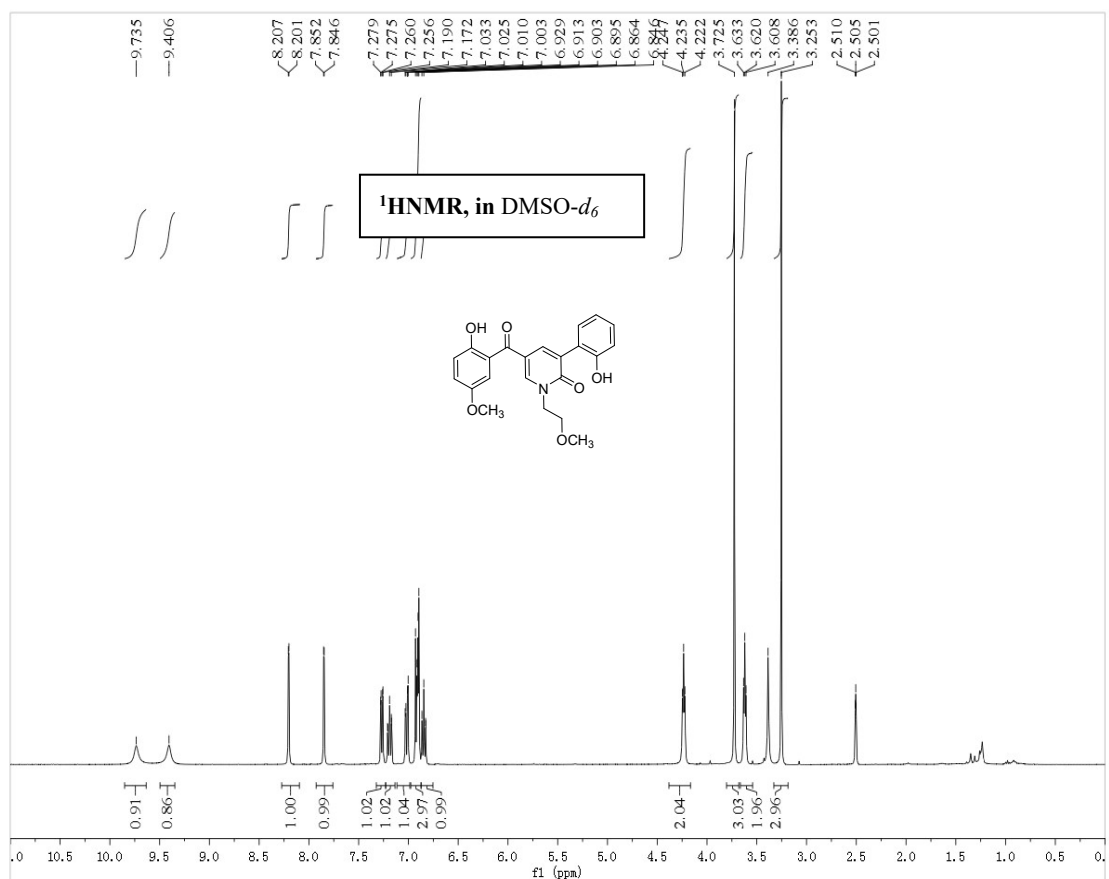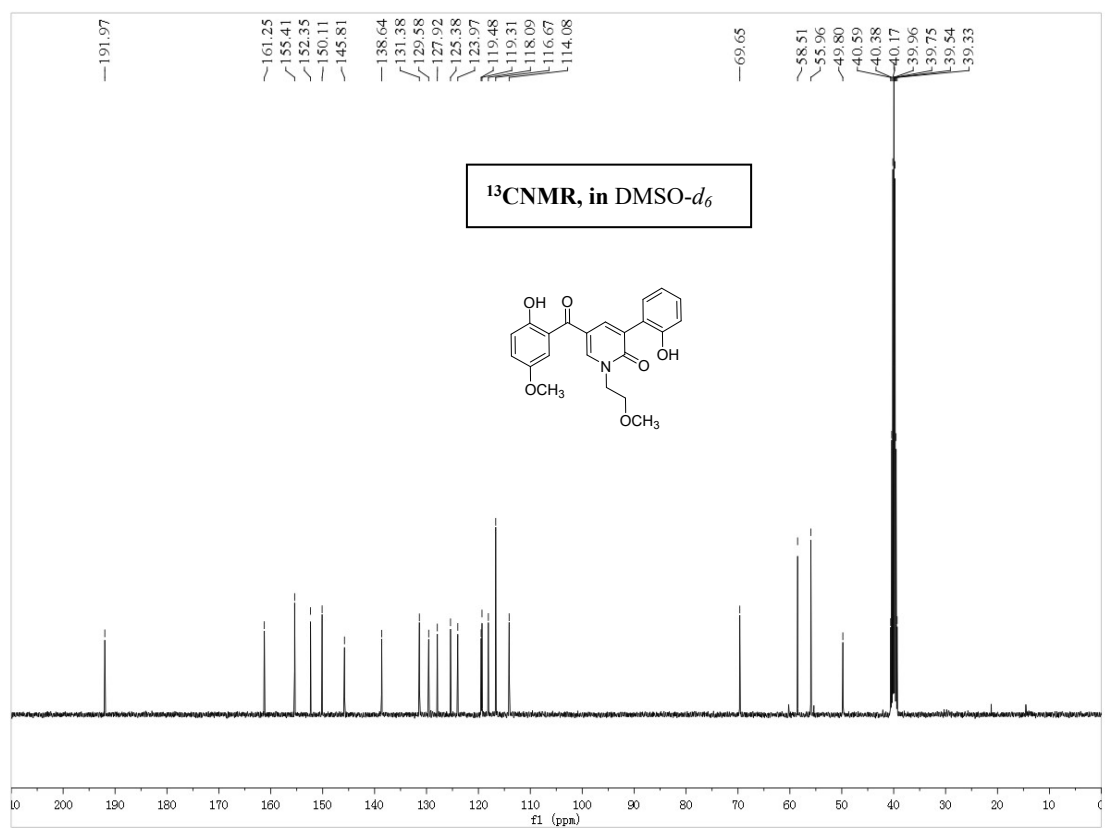

### $^1\text{H}$ and $^{13}\text{C}$ NMR of 3bf

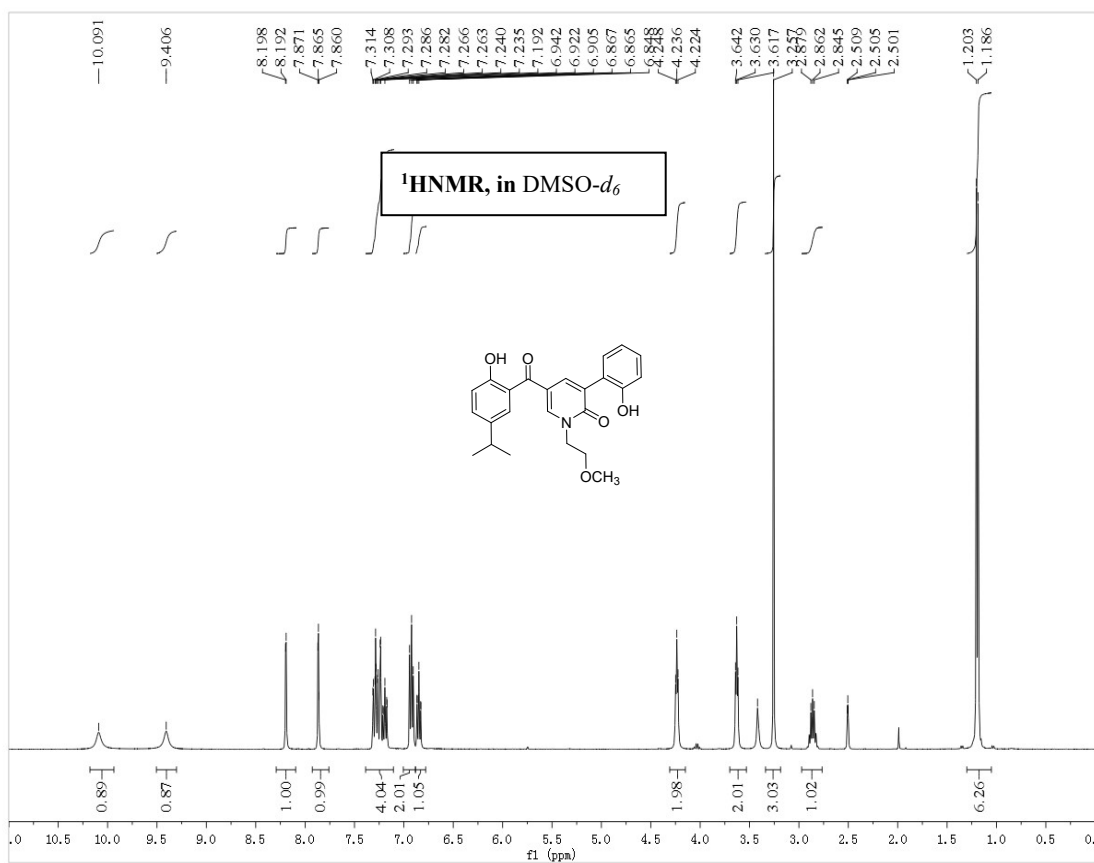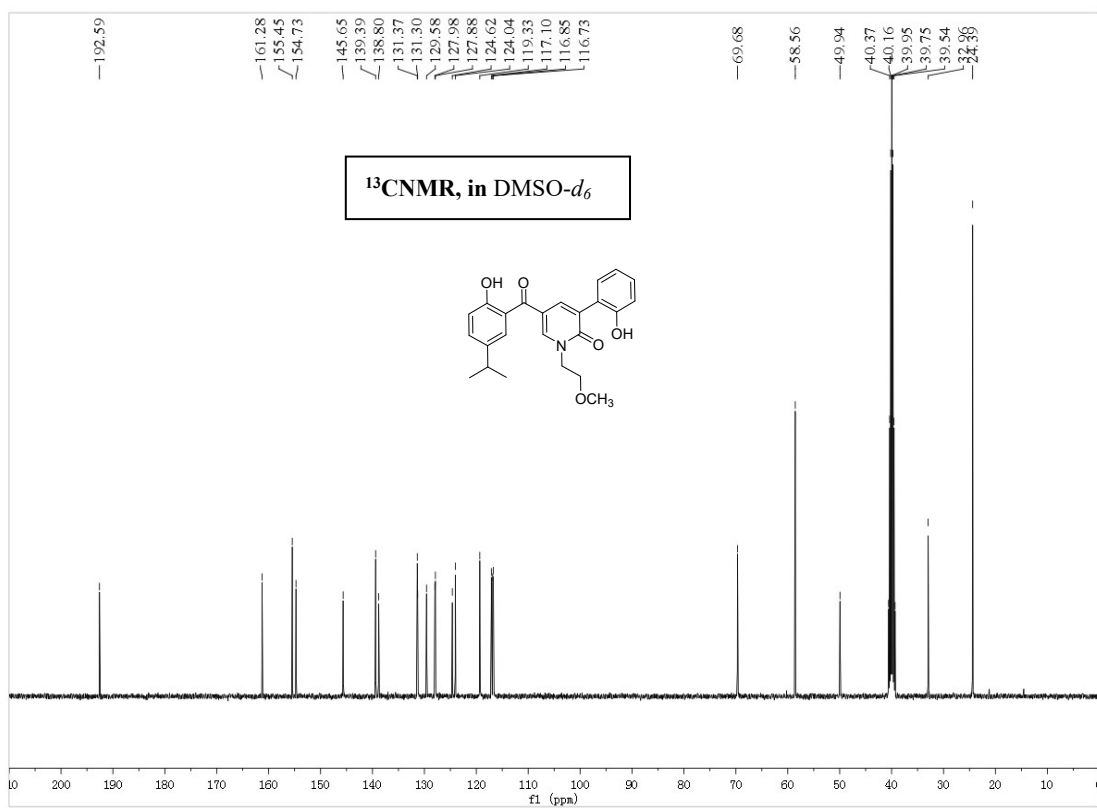

### $^1\text{H}$ and $^{13}\text{C}$ NMR of 3bg

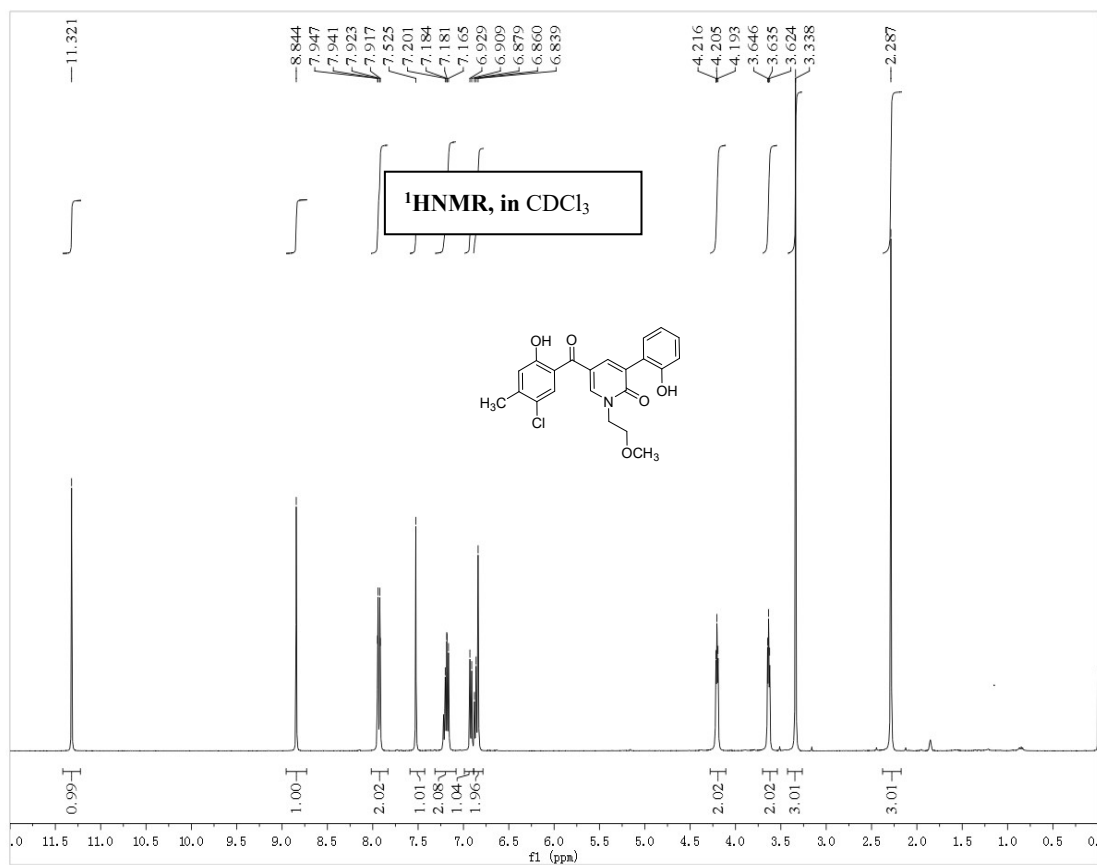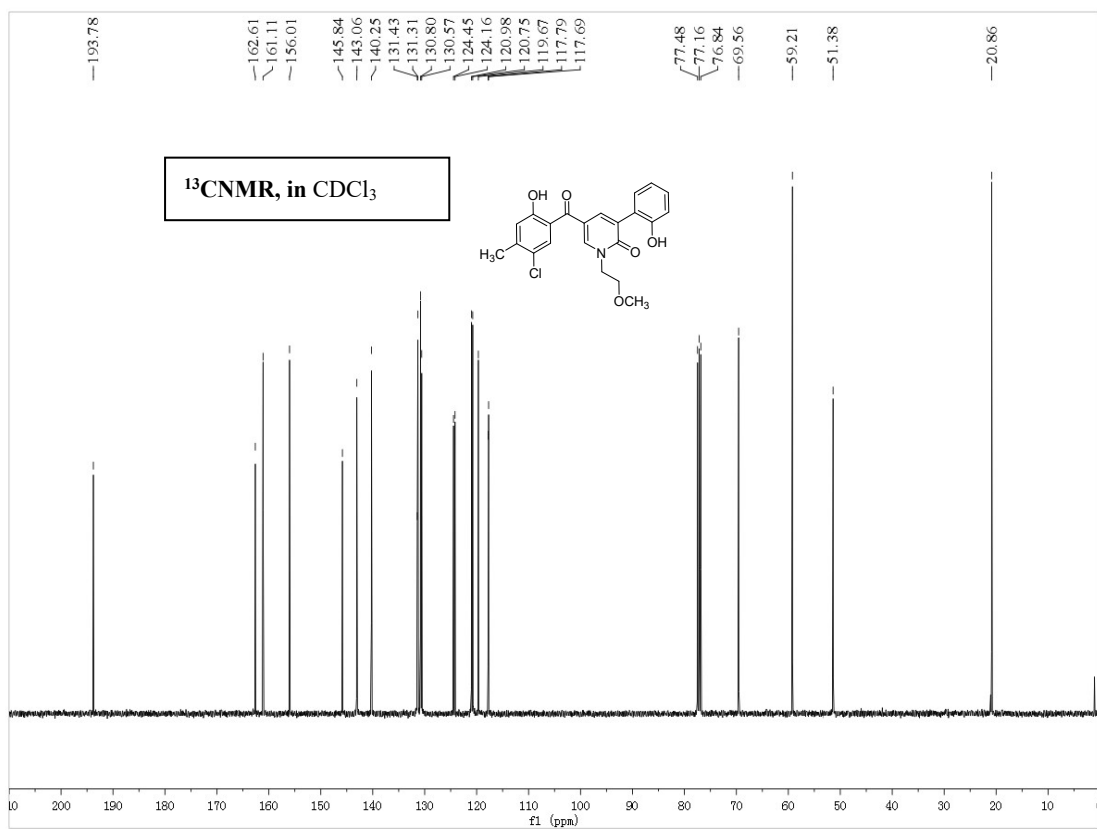

### <sup>1</sup>H and <sup>13</sup>C NMR of 3bh

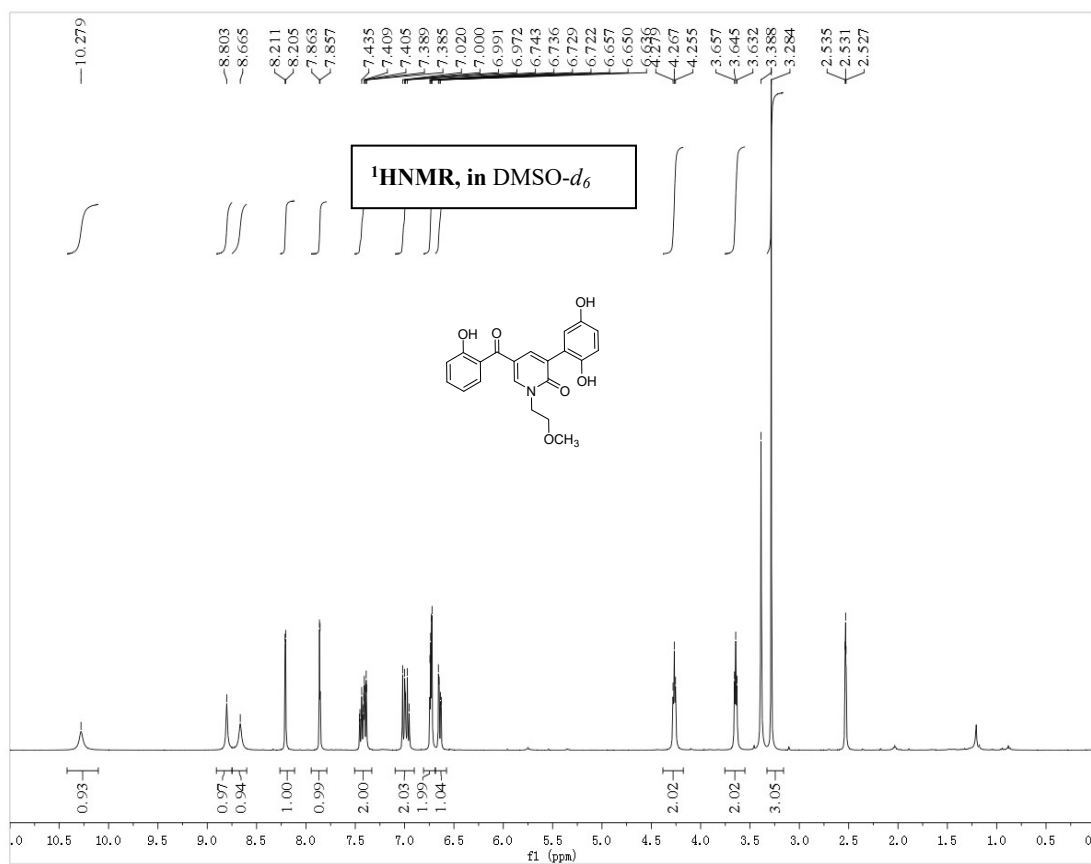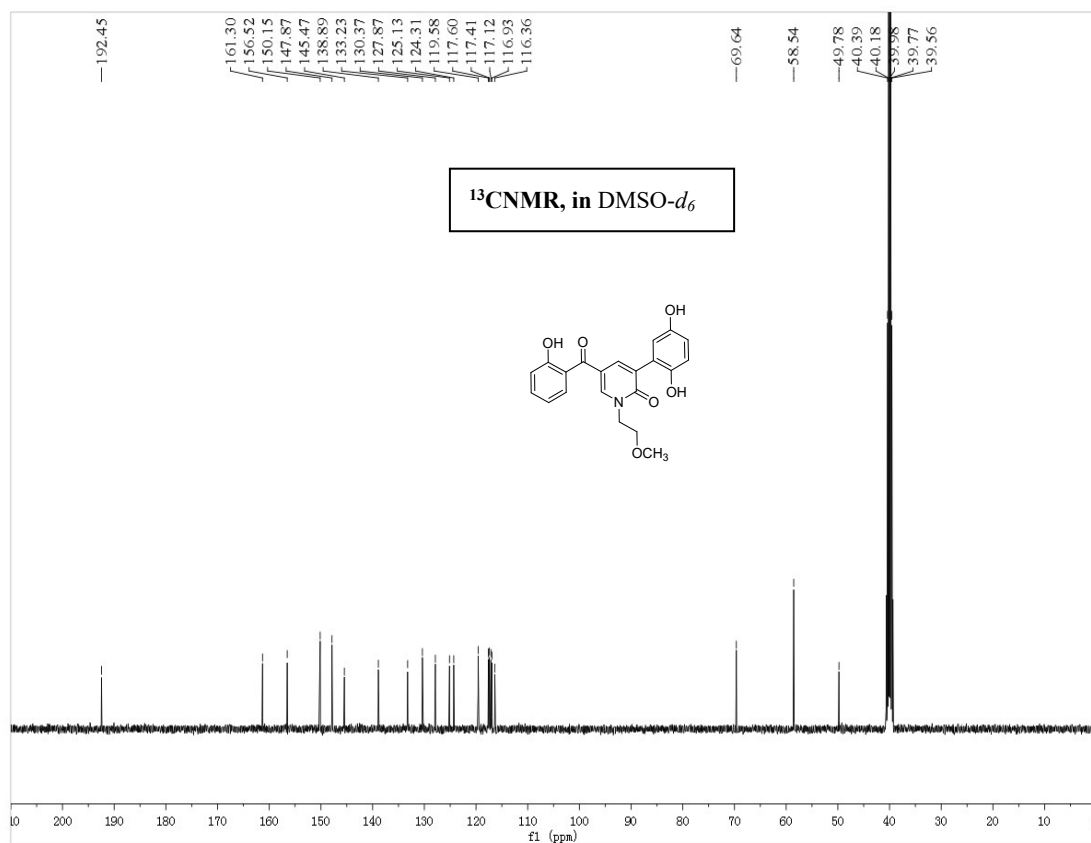

# <sup>1</sup>H and <sup>13</sup>C NMR of 3ca

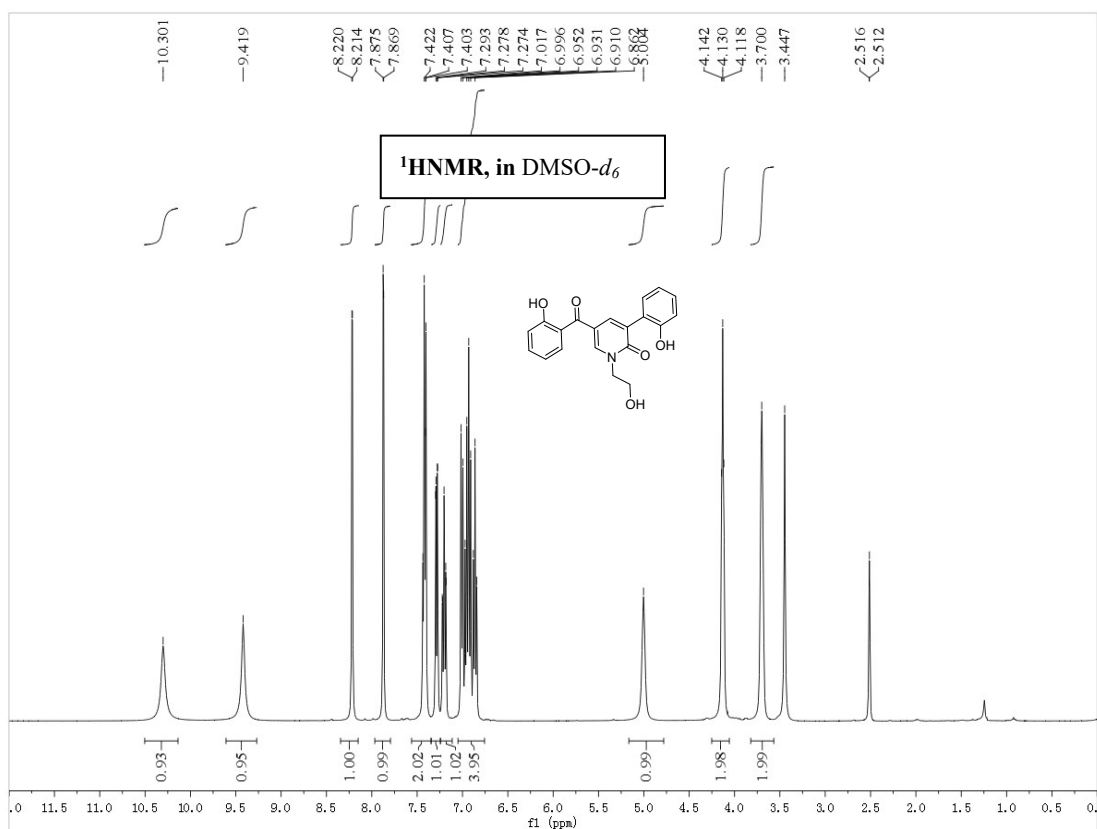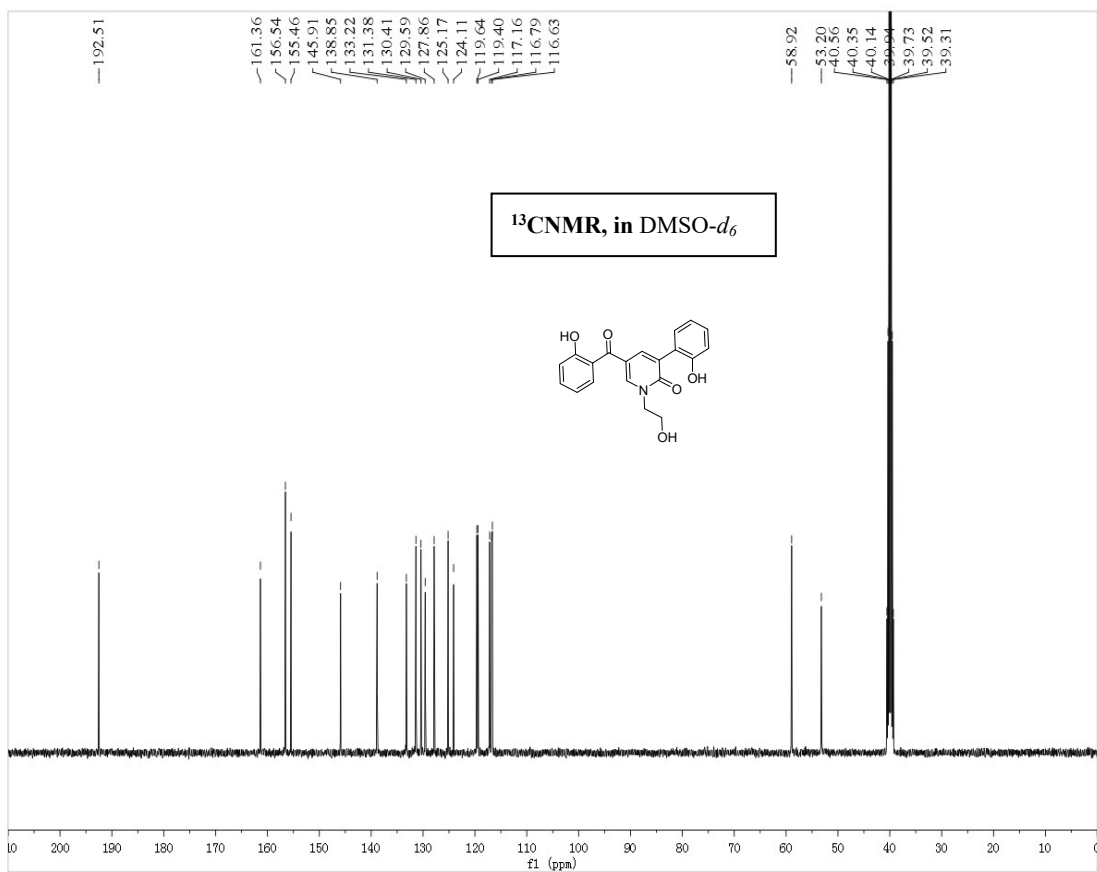

### $^1\text{H}$ and $^{13}\text{C}$ NMR of 3cb

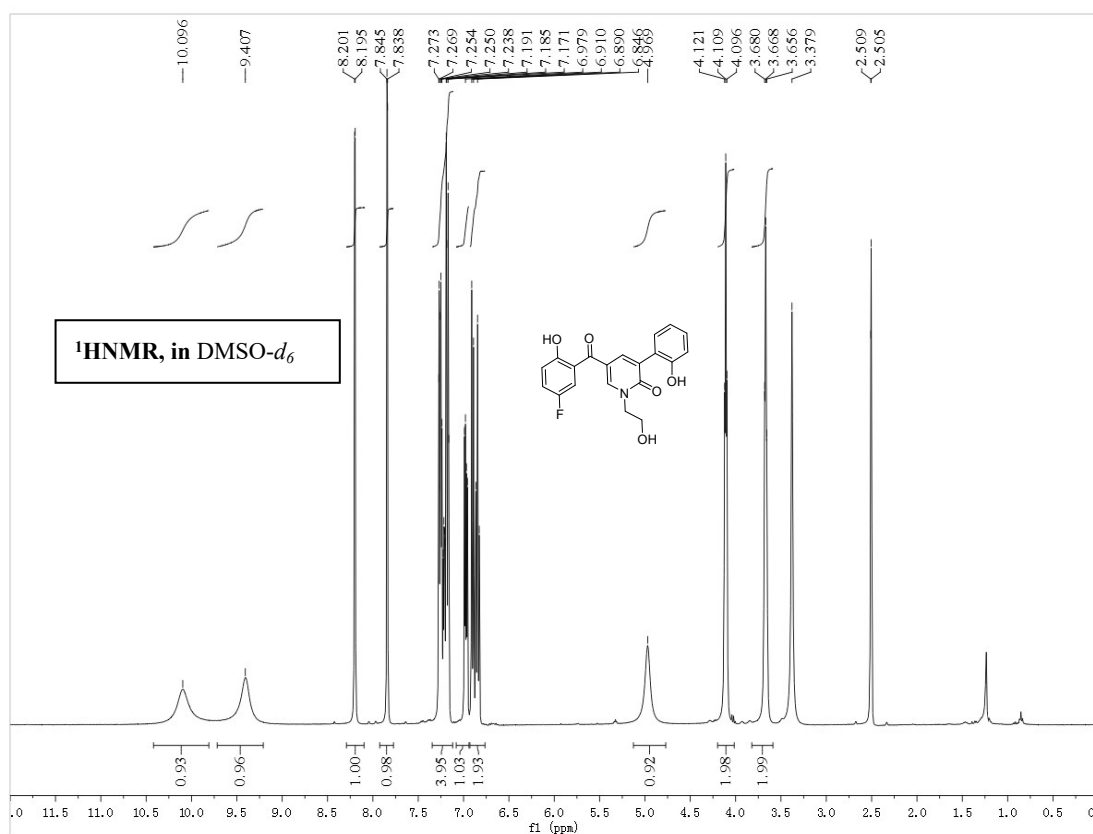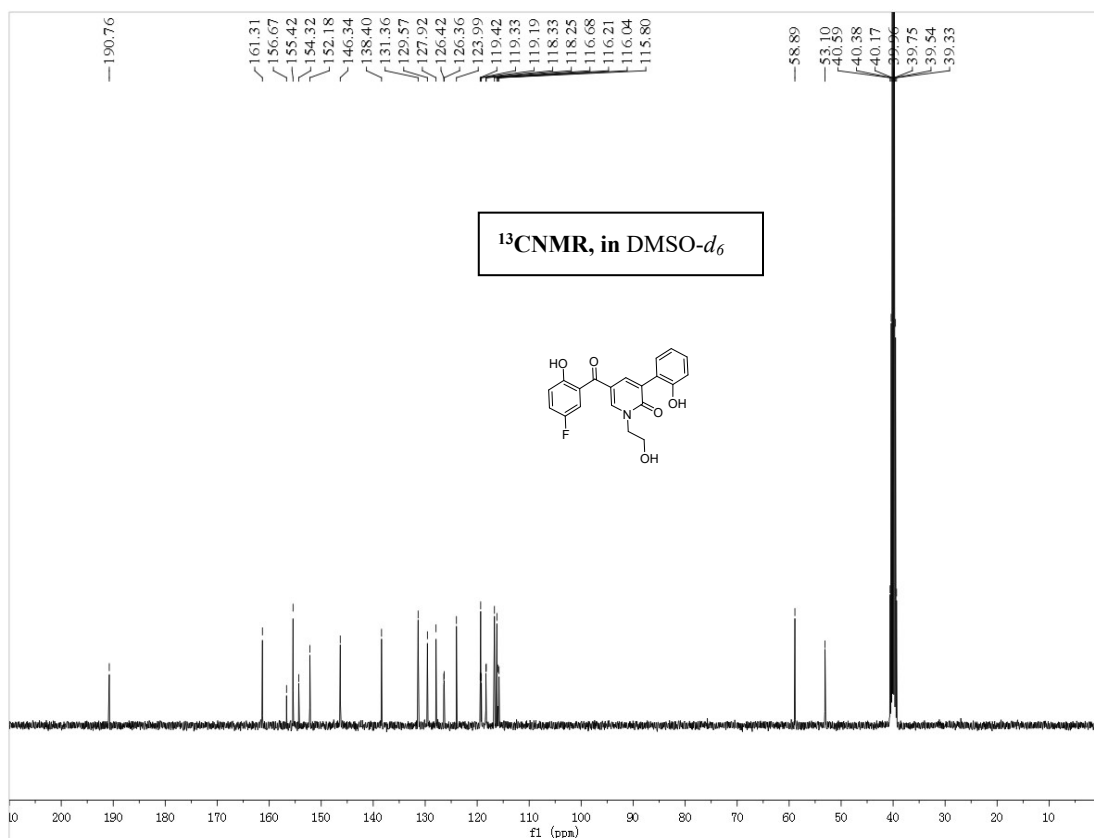



# <sup>19</sup>F NMR of 3cb

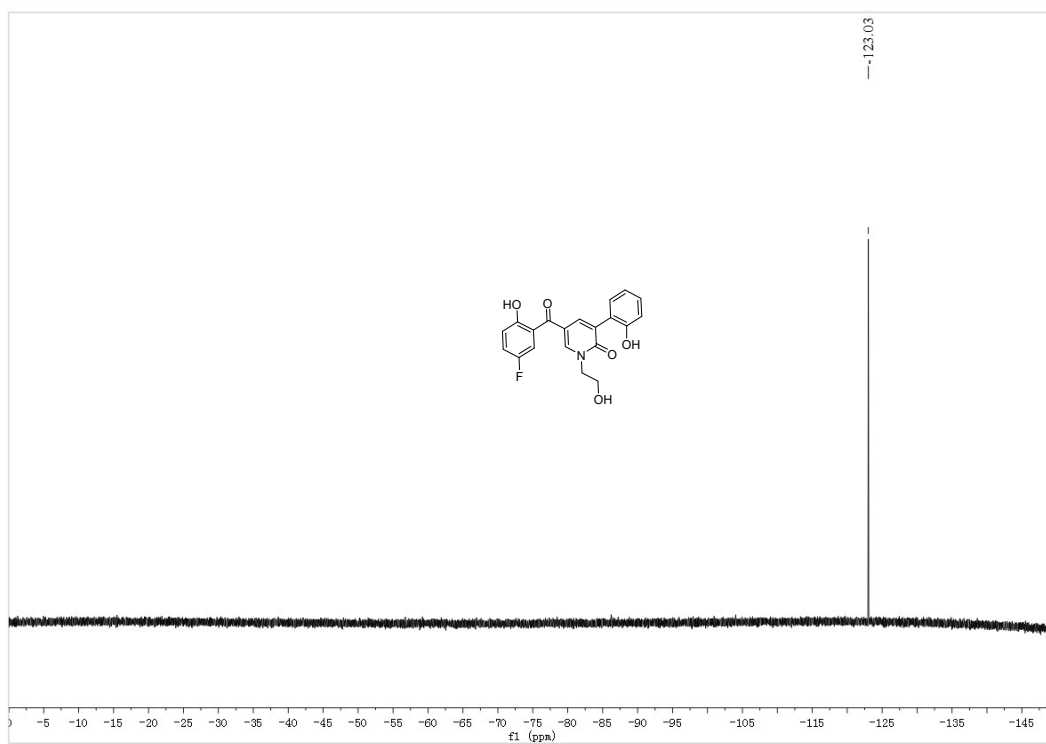

### $^1\text{H}$ and $^{13}\text{C}$ NMR of 3cc

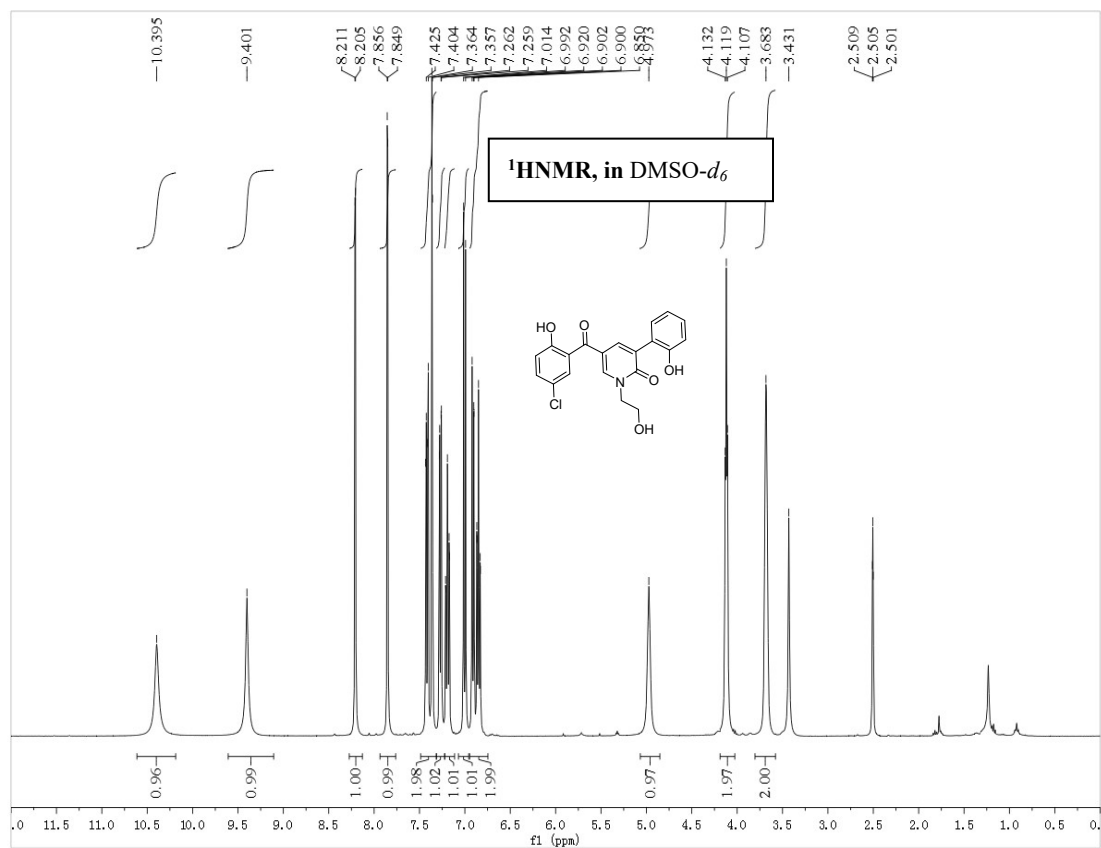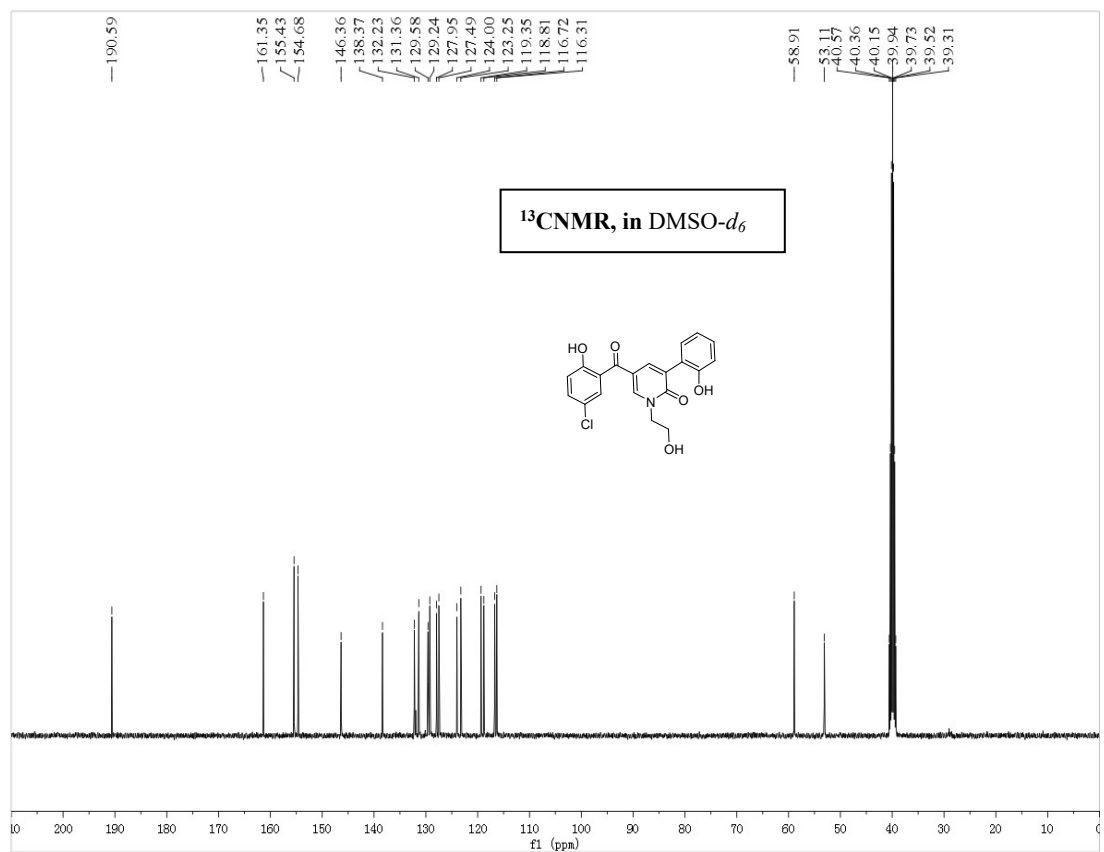

### <sup>1</sup>H and <sup>13</sup>C NMR of 3cd

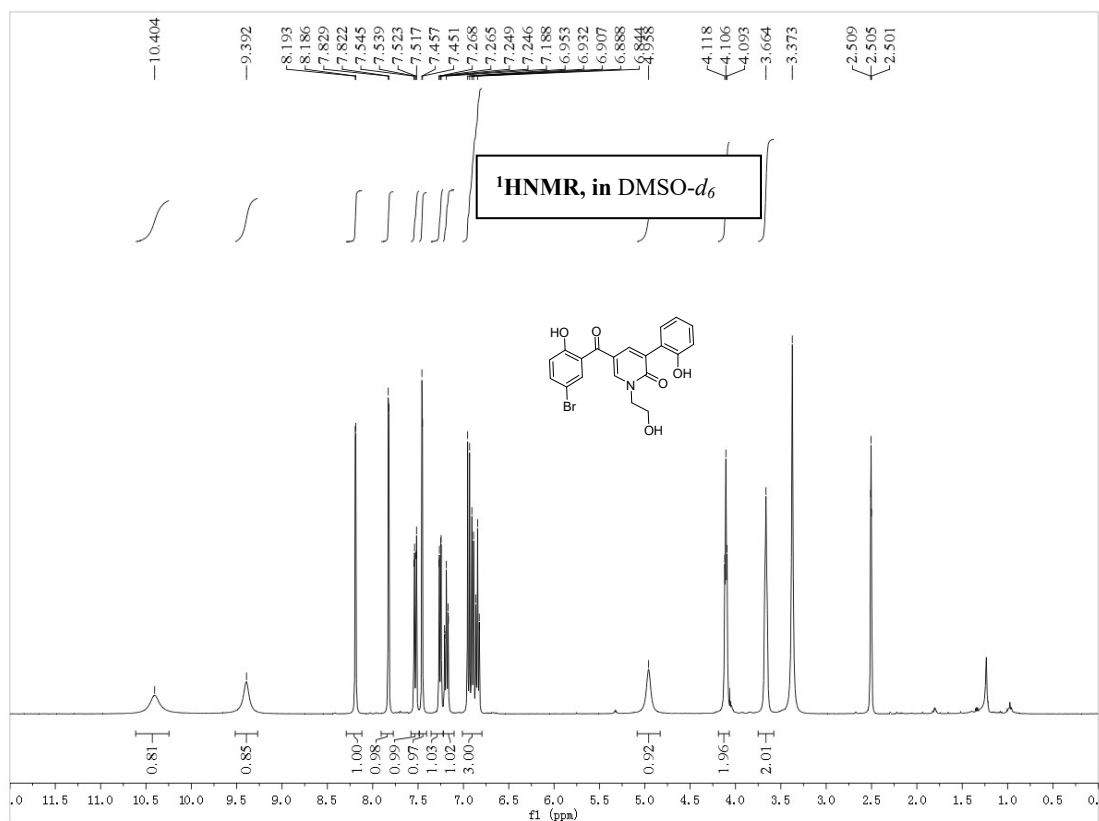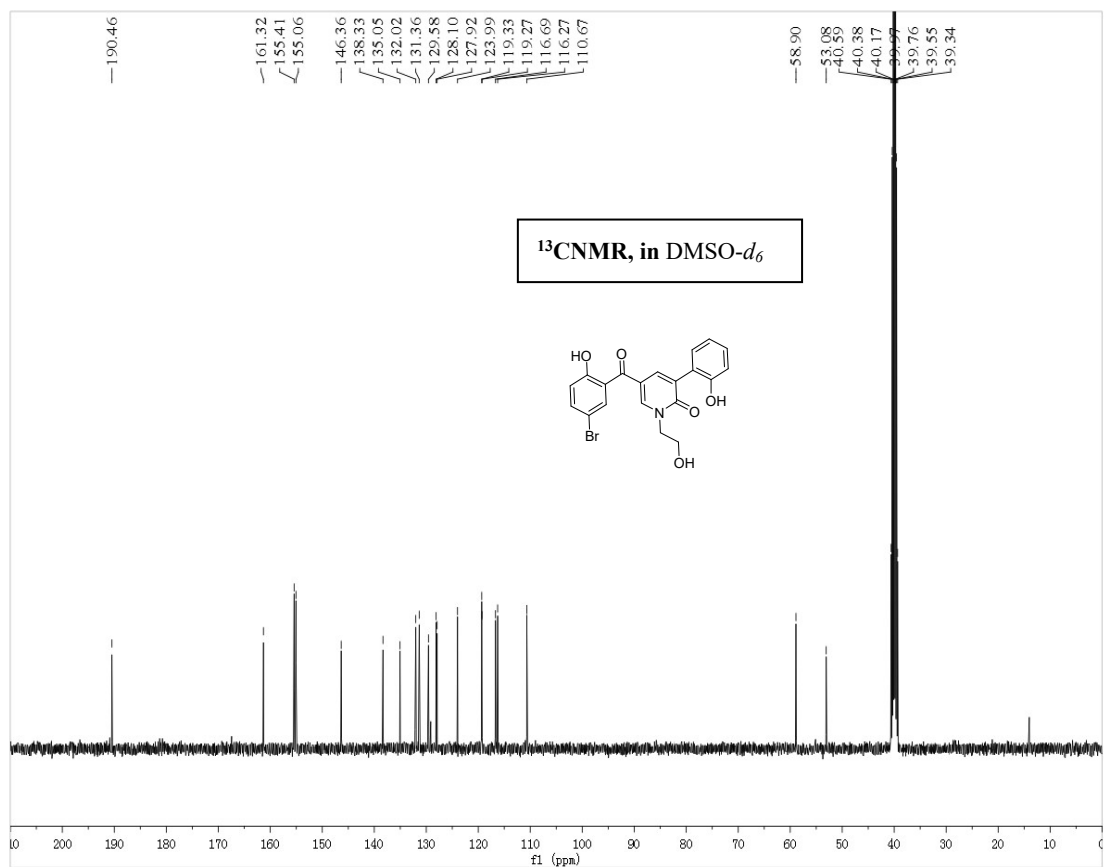

### $^1\text{H}$ and $^{13}\text{C}$ NMR of 3ce

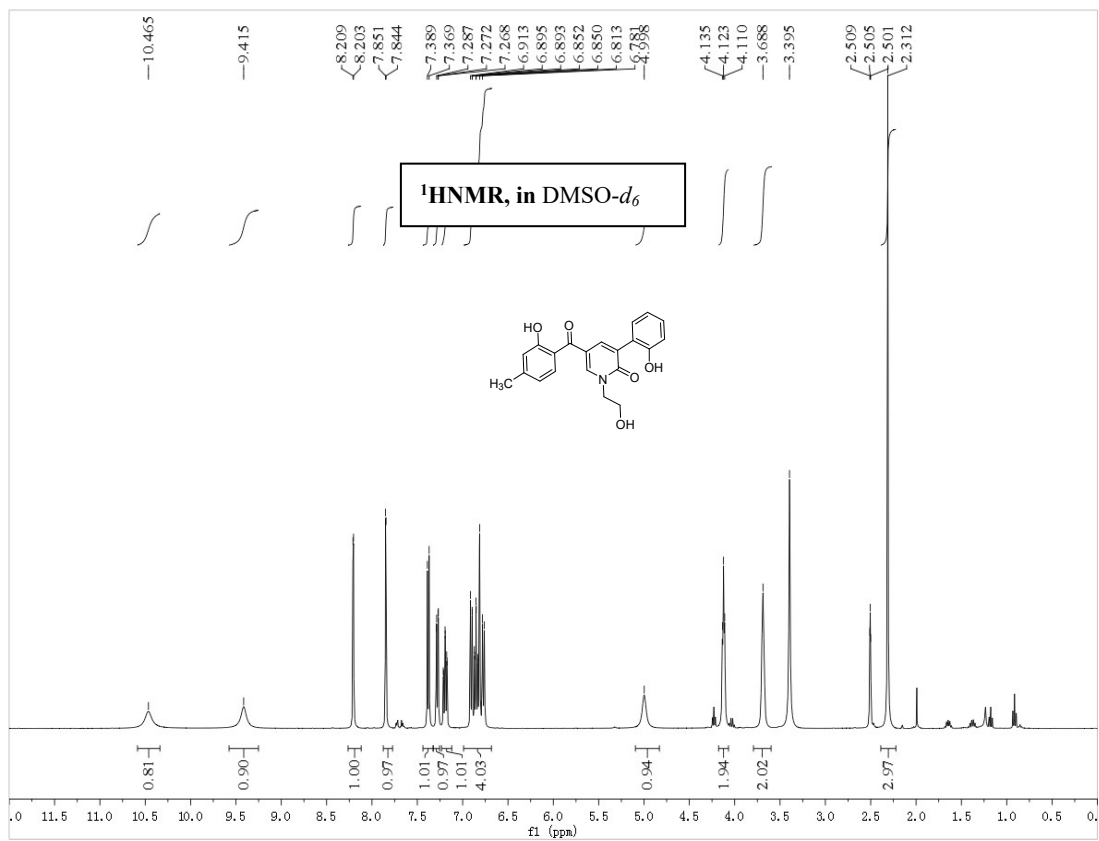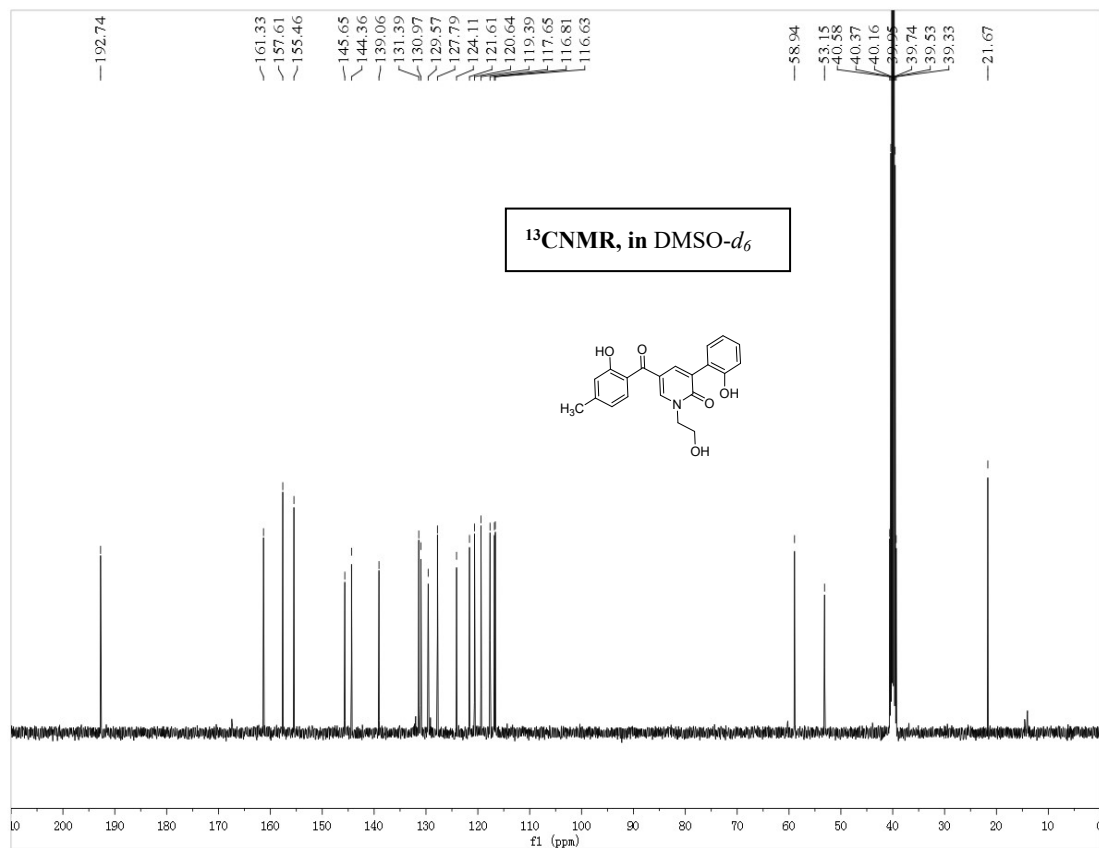

# <sup>1</sup>H and <sup>13</sup>C NMR of 3cf

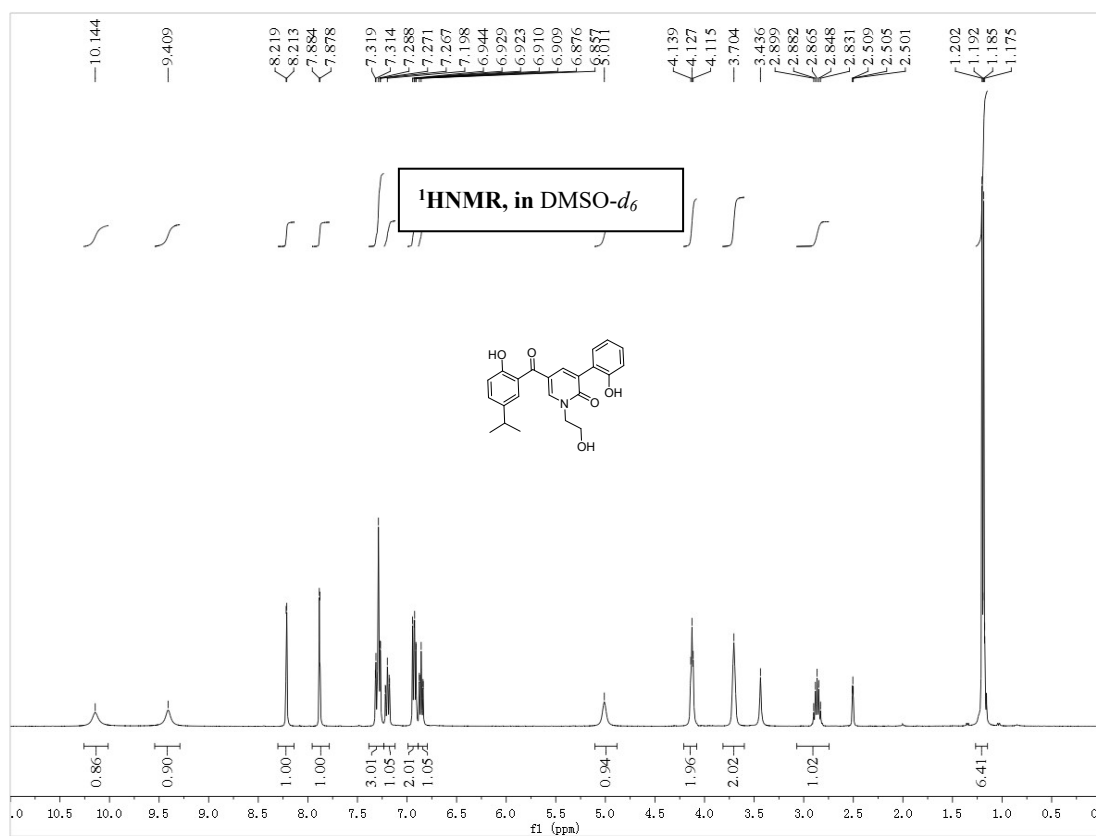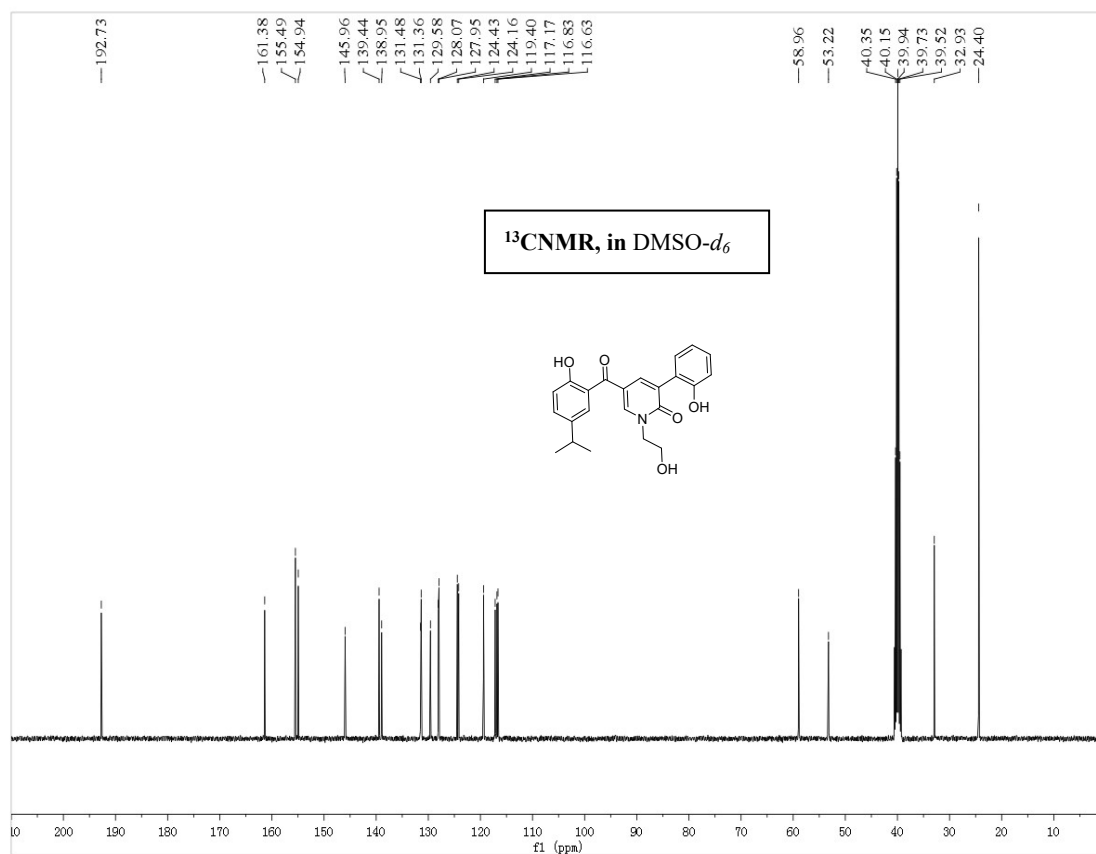

### <sup>1</sup>H and <sup>13</sup>C NMR of 3cg

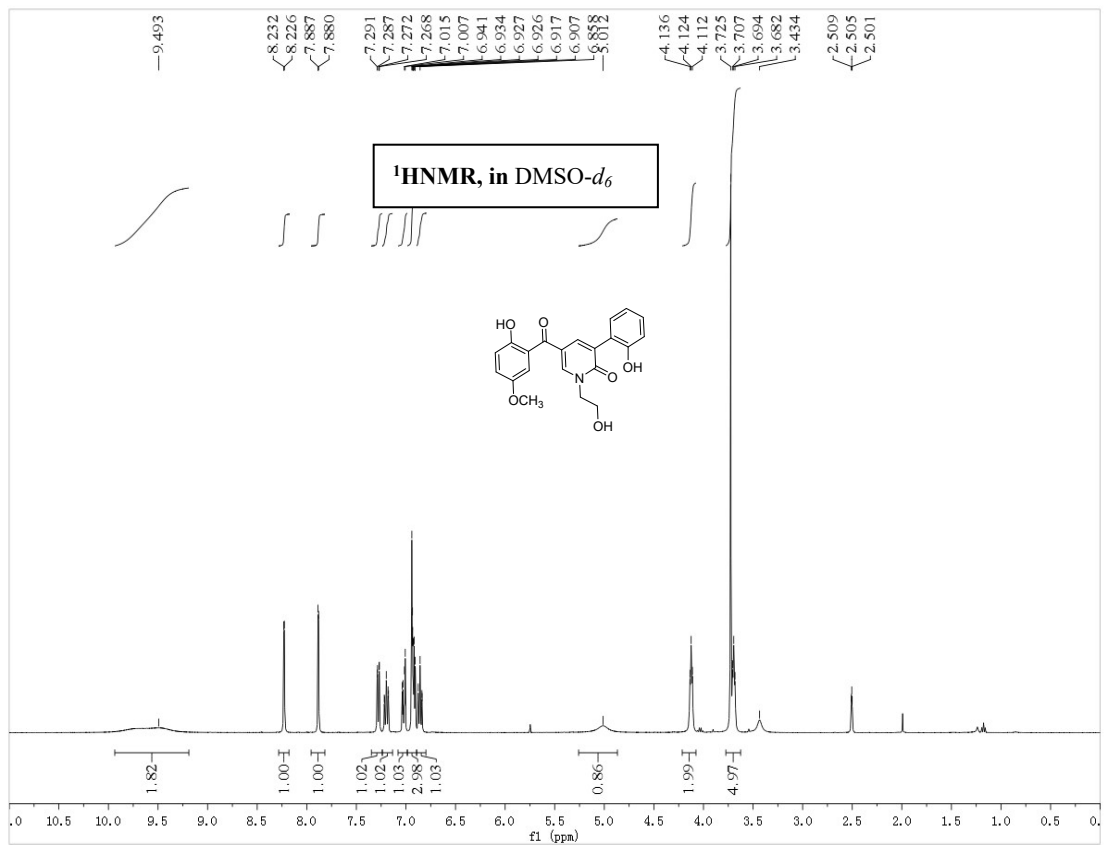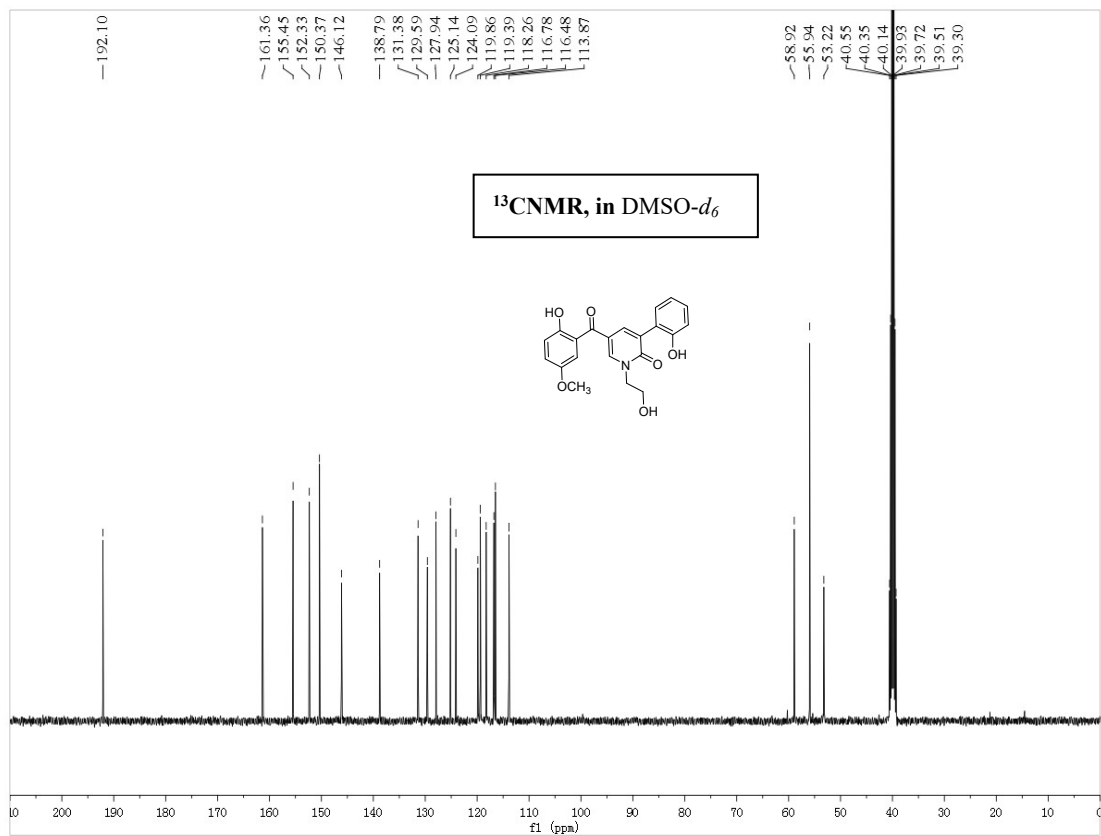

### $^1\text{H}$ and $^{13}\text{C}$ NMR of 3ch

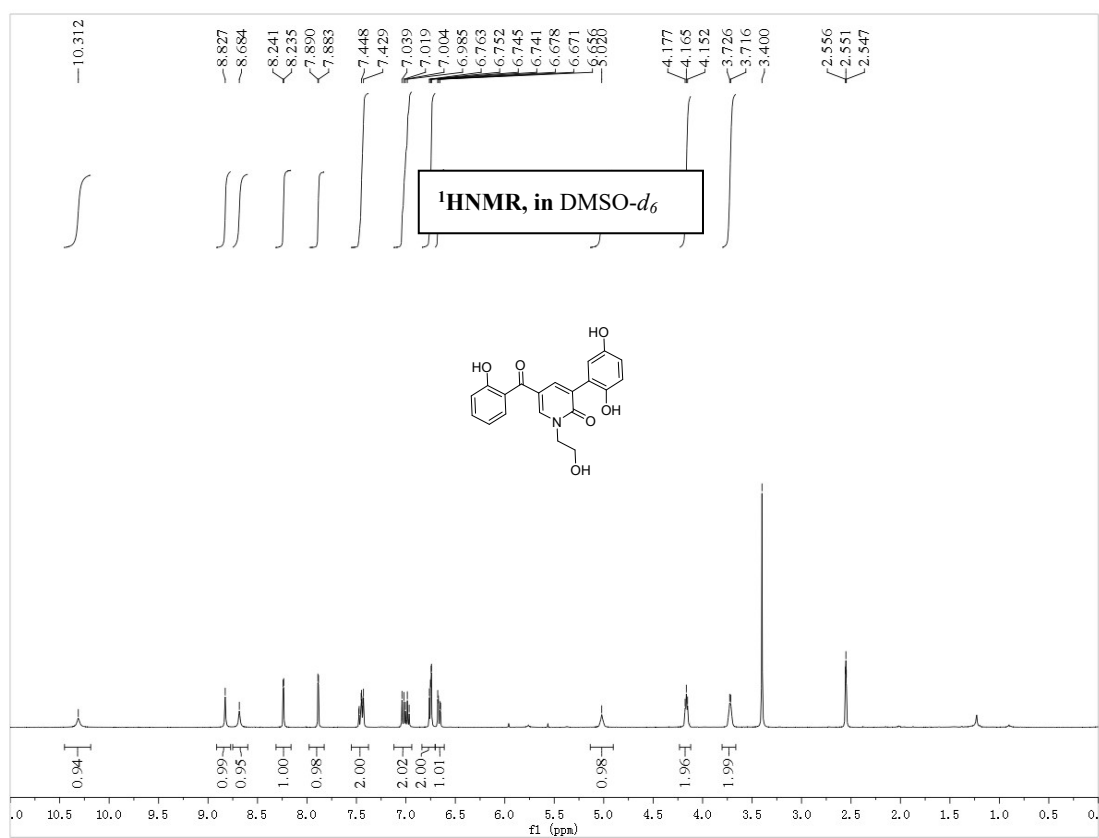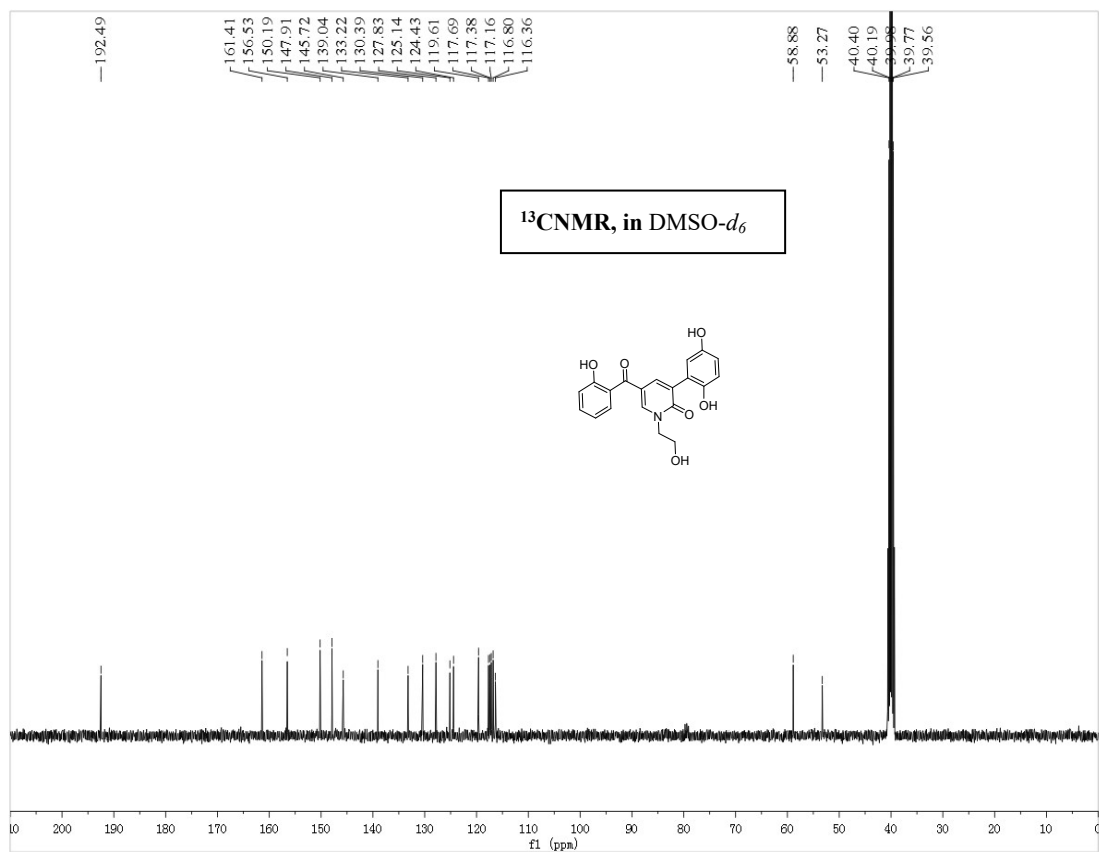

### $^1\text{H}$ and $^{13}\text{C}$ NMR of 3ci

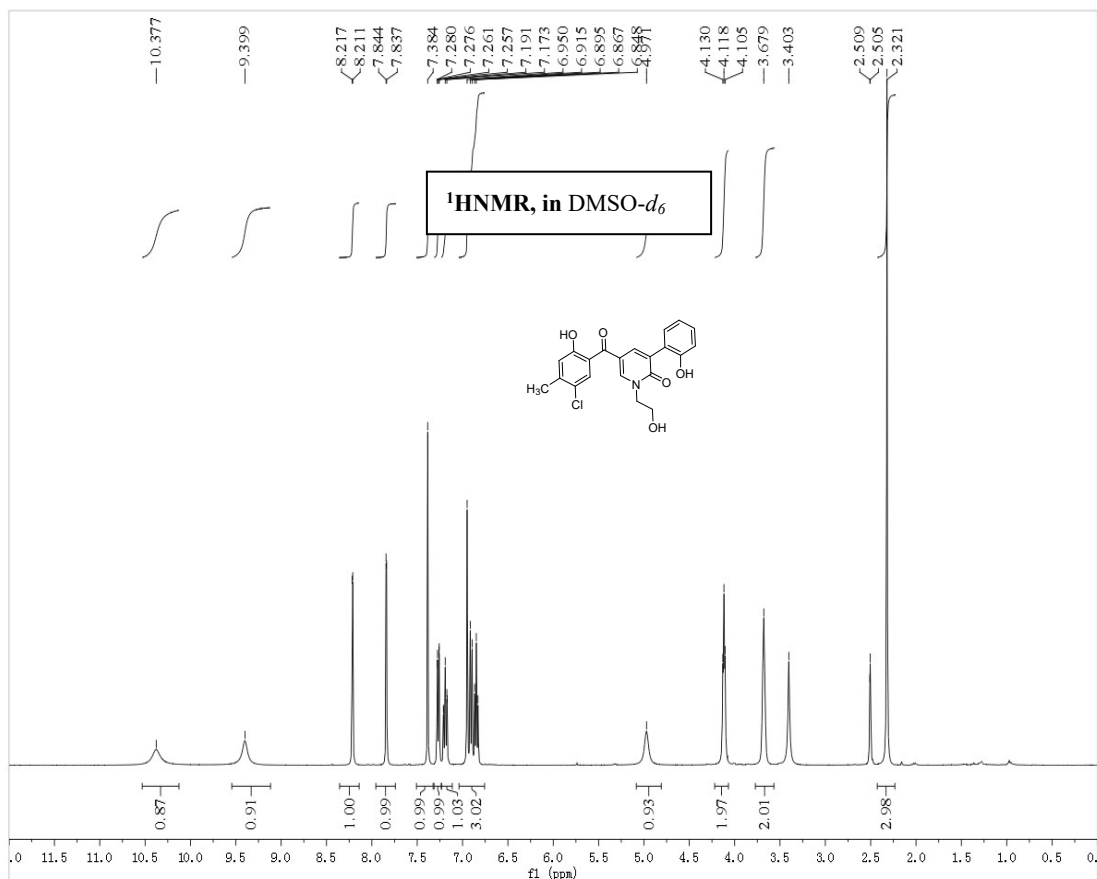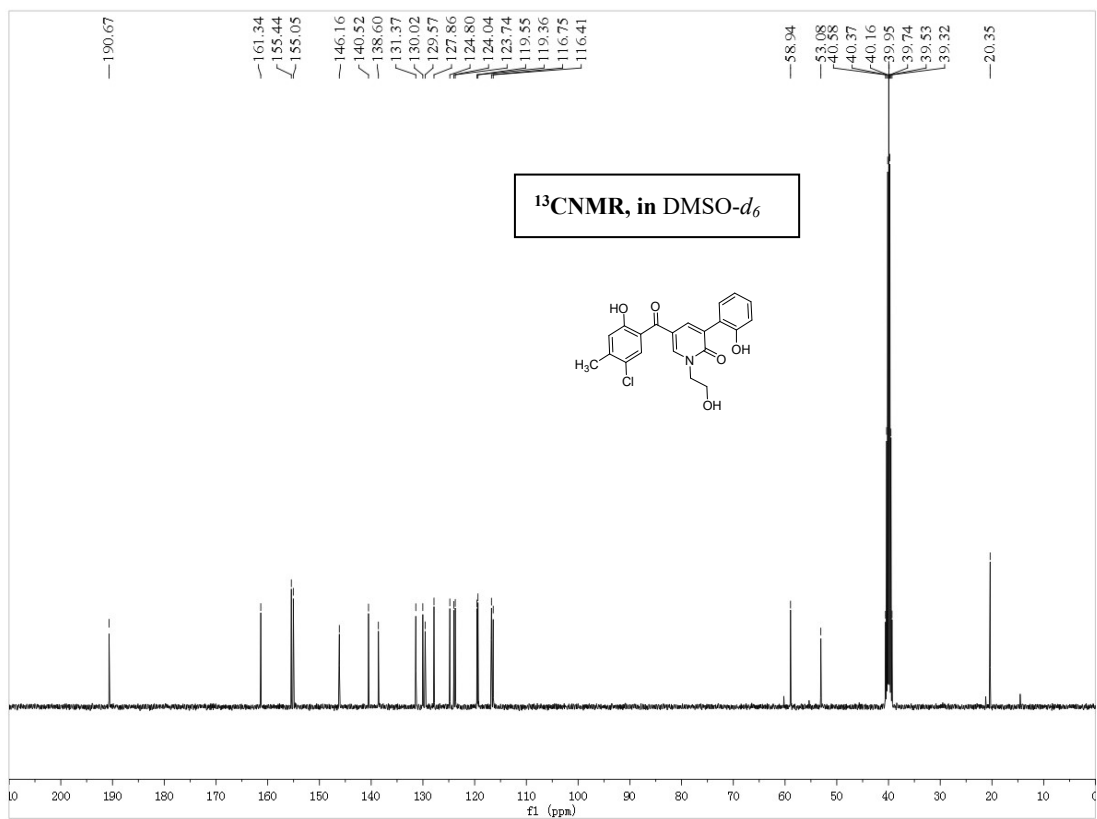



### $^1\text{H}$ and $^{13}\text{C}$ NMR of 3da

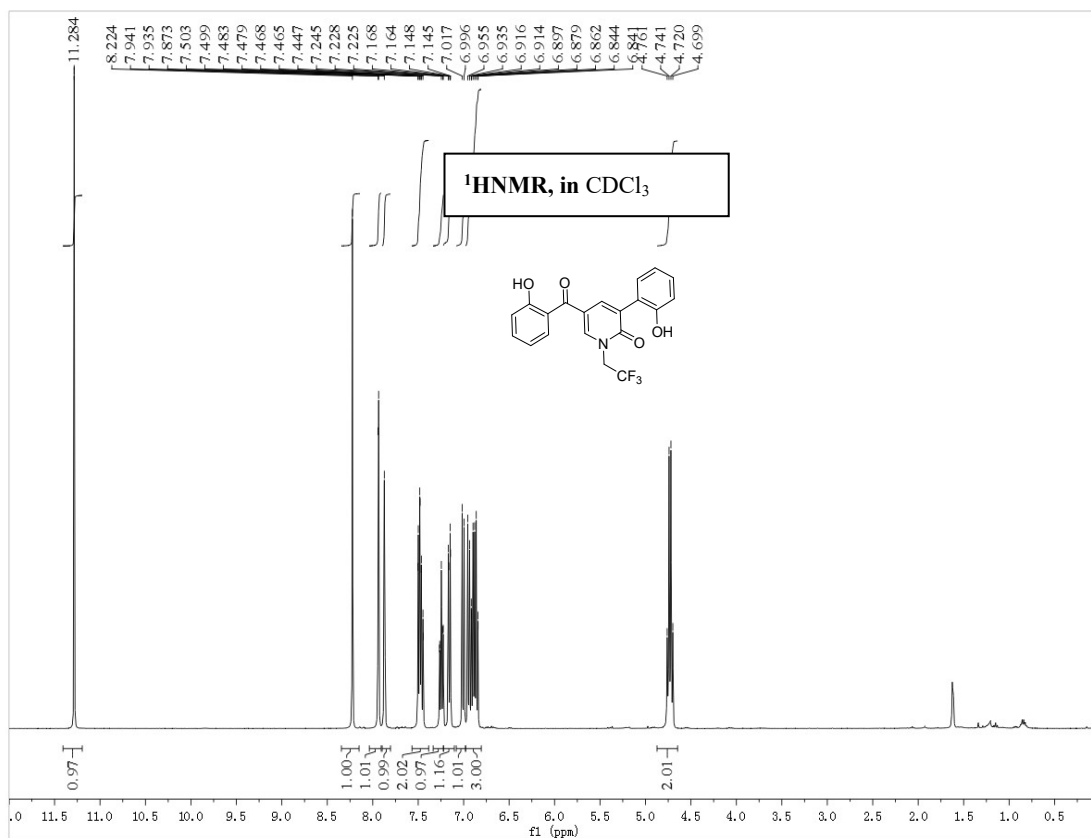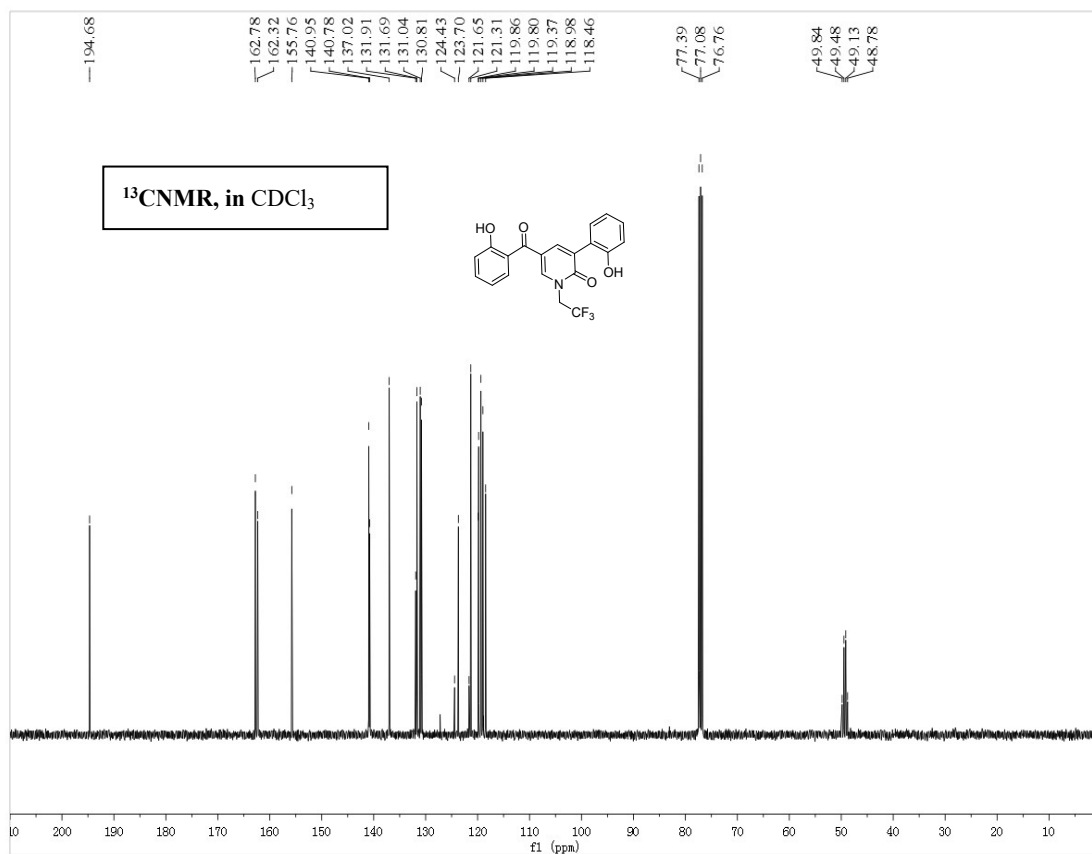

### <sup>19</sup>F NMR of 3da

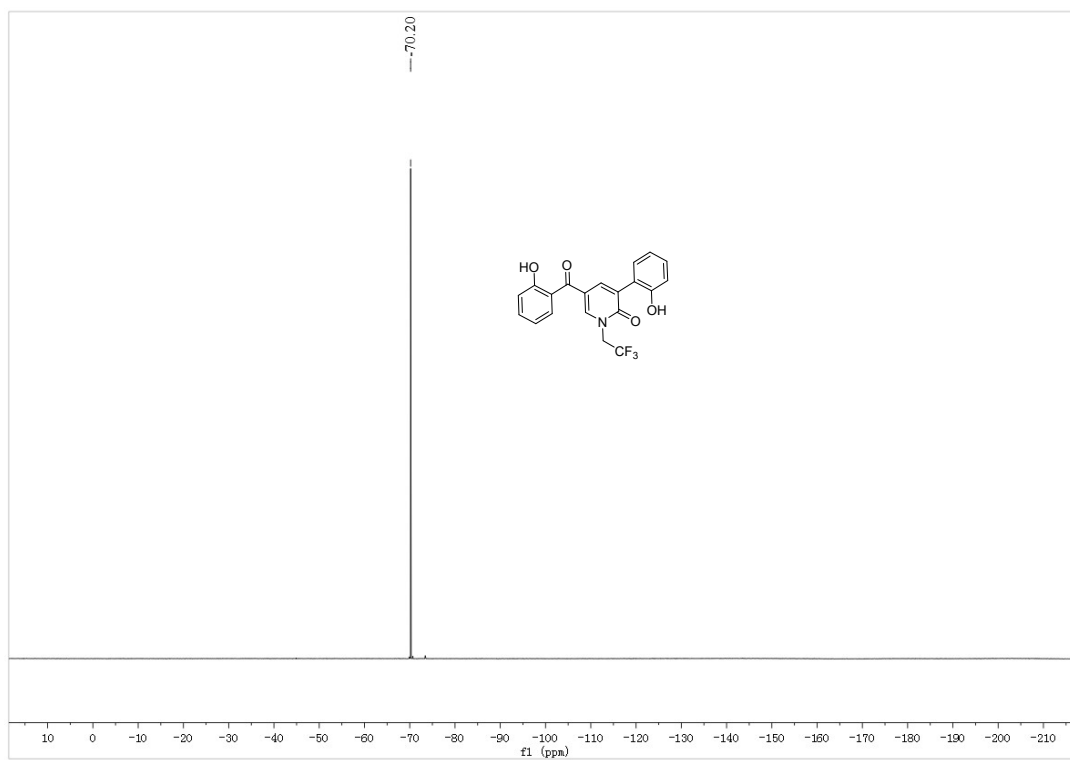

### $^1\text{H}$ and $^{13}\text{C}$ NMR of 3db

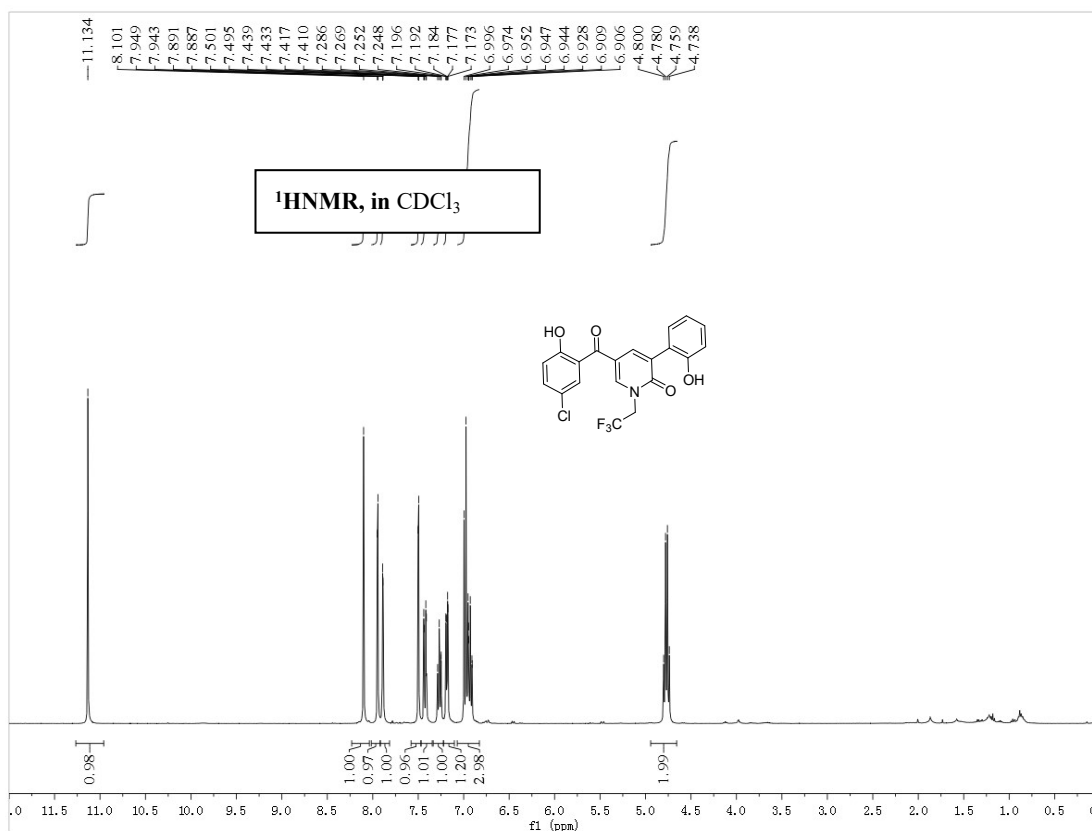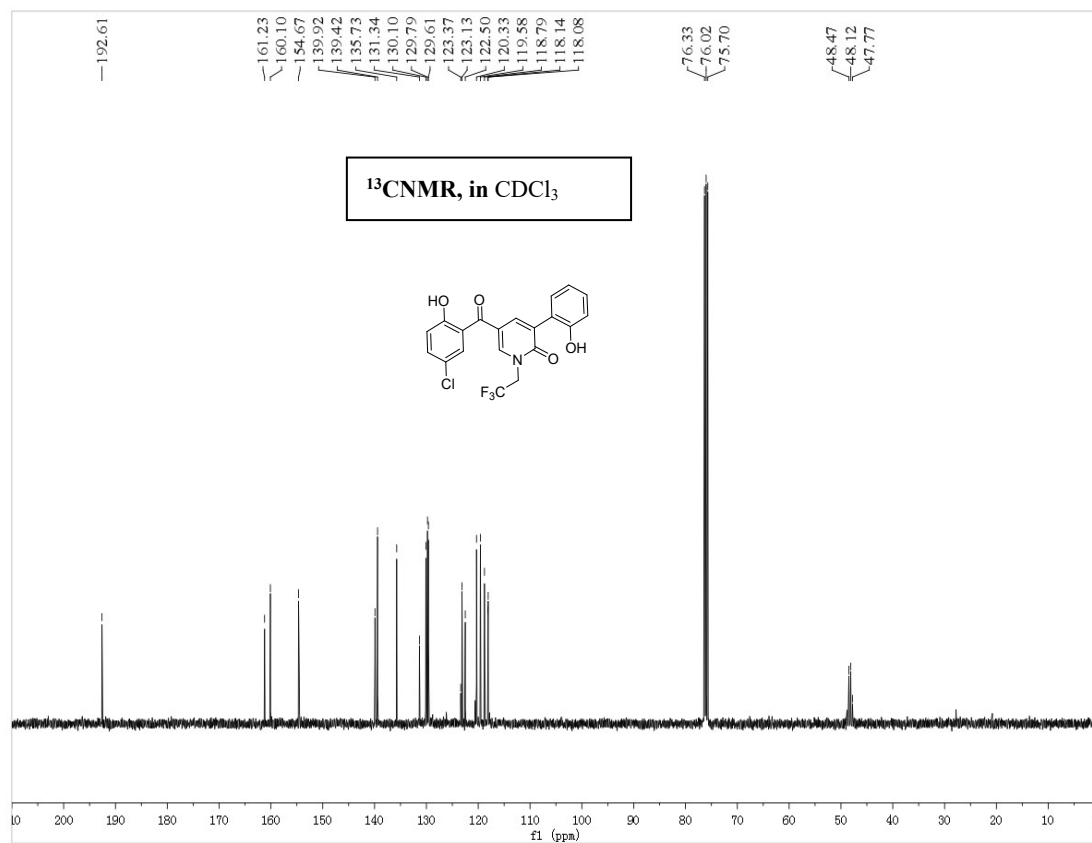

# <sup>19</sup>F NMR of 3db

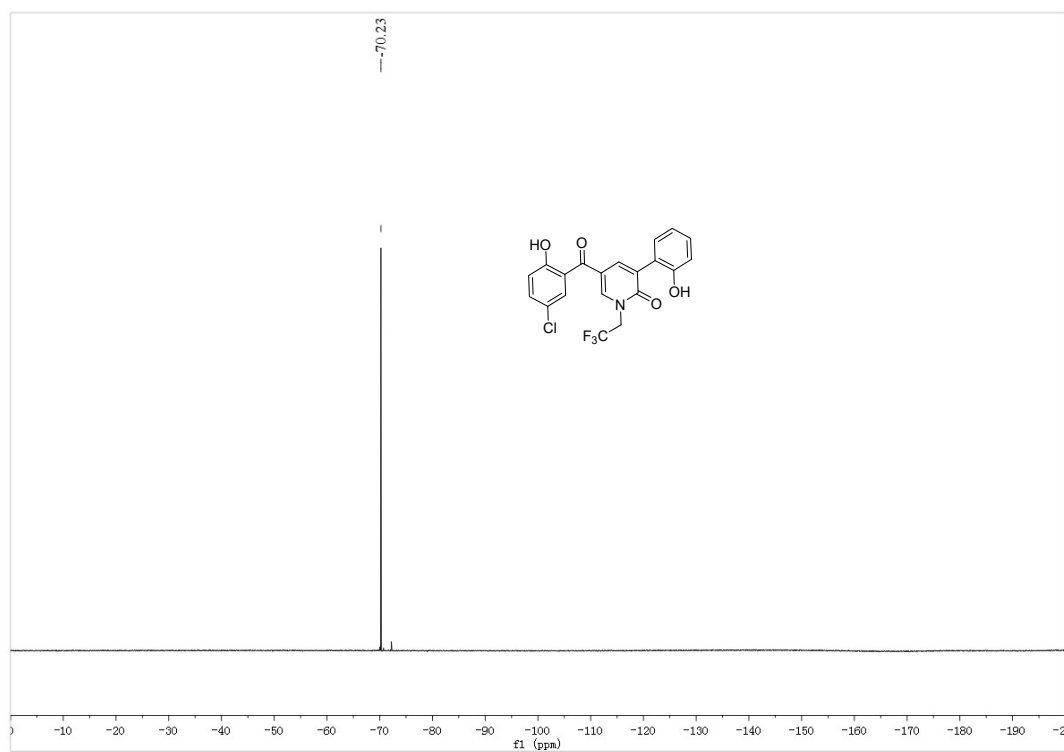

### $^1\text{H}$ and $^{13}\text{C}$ NMR of 3dc

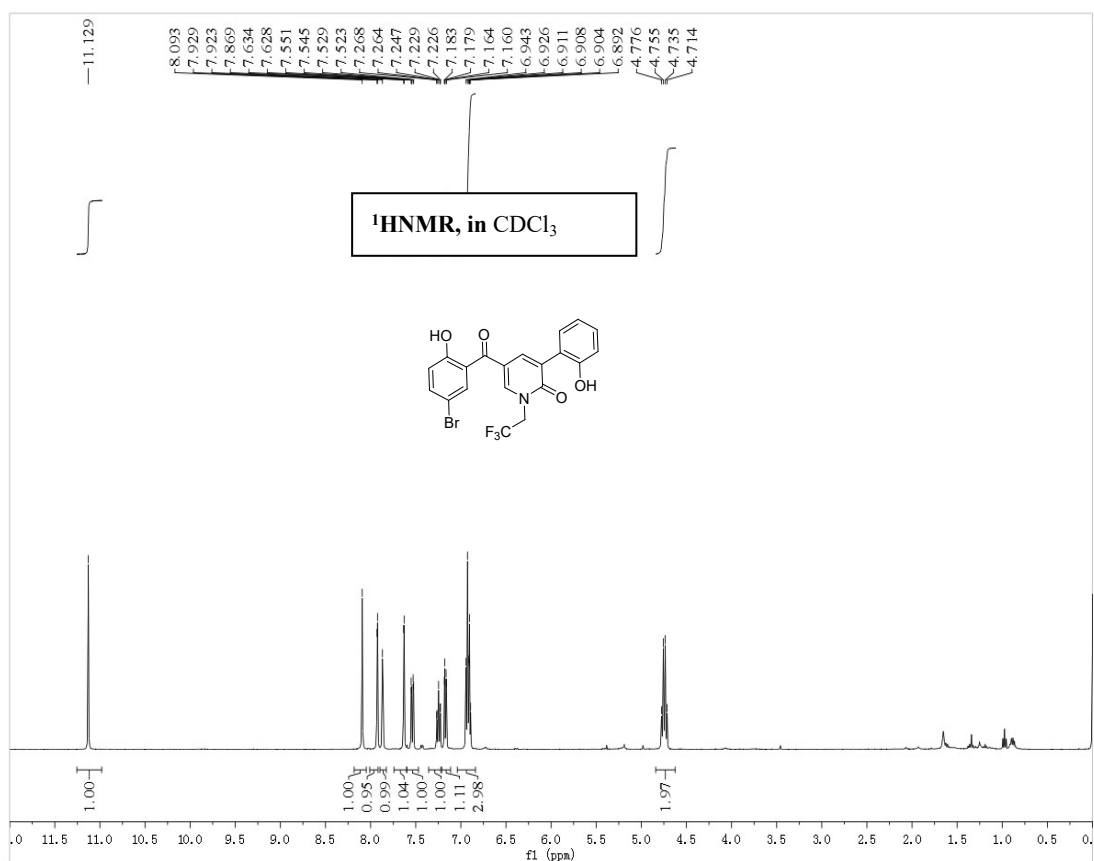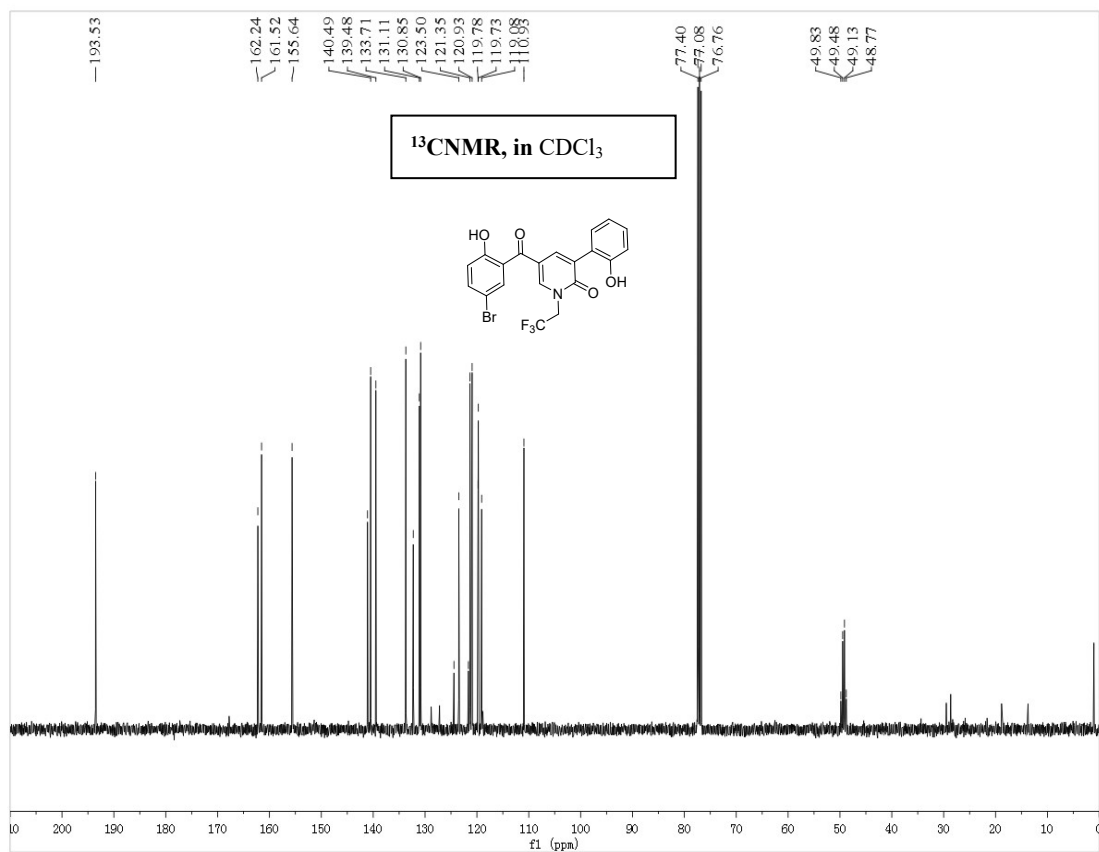

**<sup>19</sup>F NMR of 3dc**

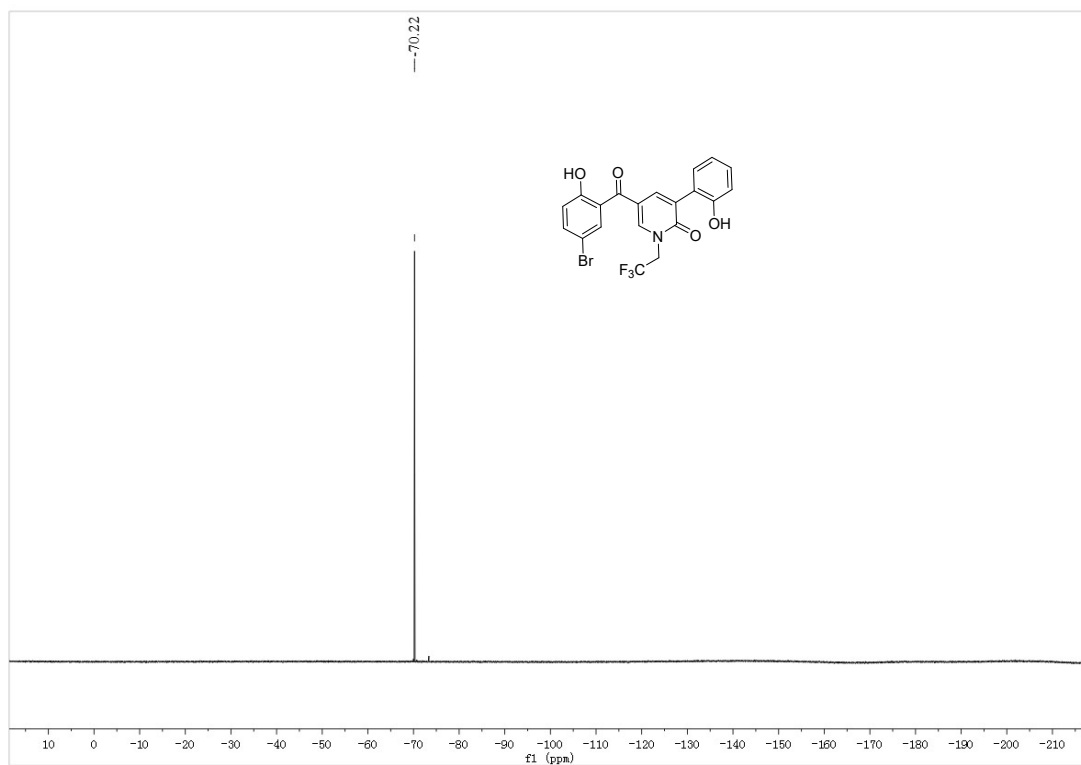

### <sup>1</sup>H and <sup>13</sup>C NMR of 3dd

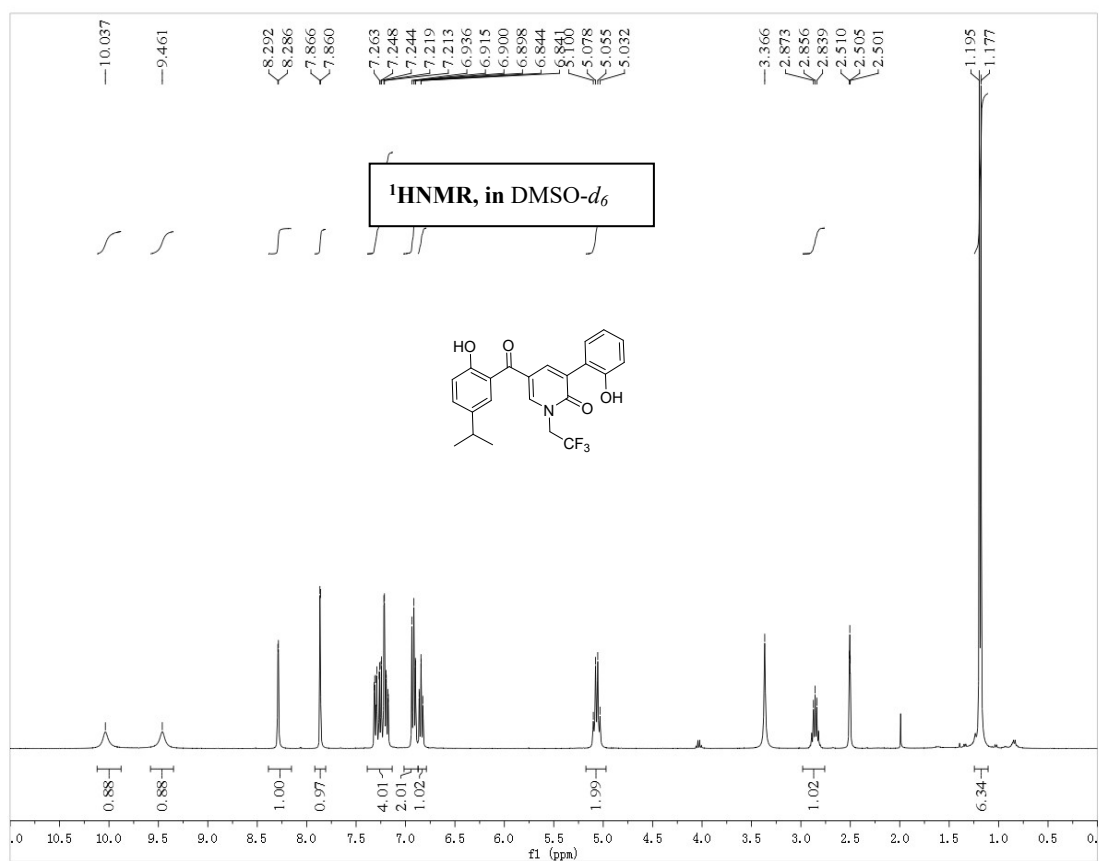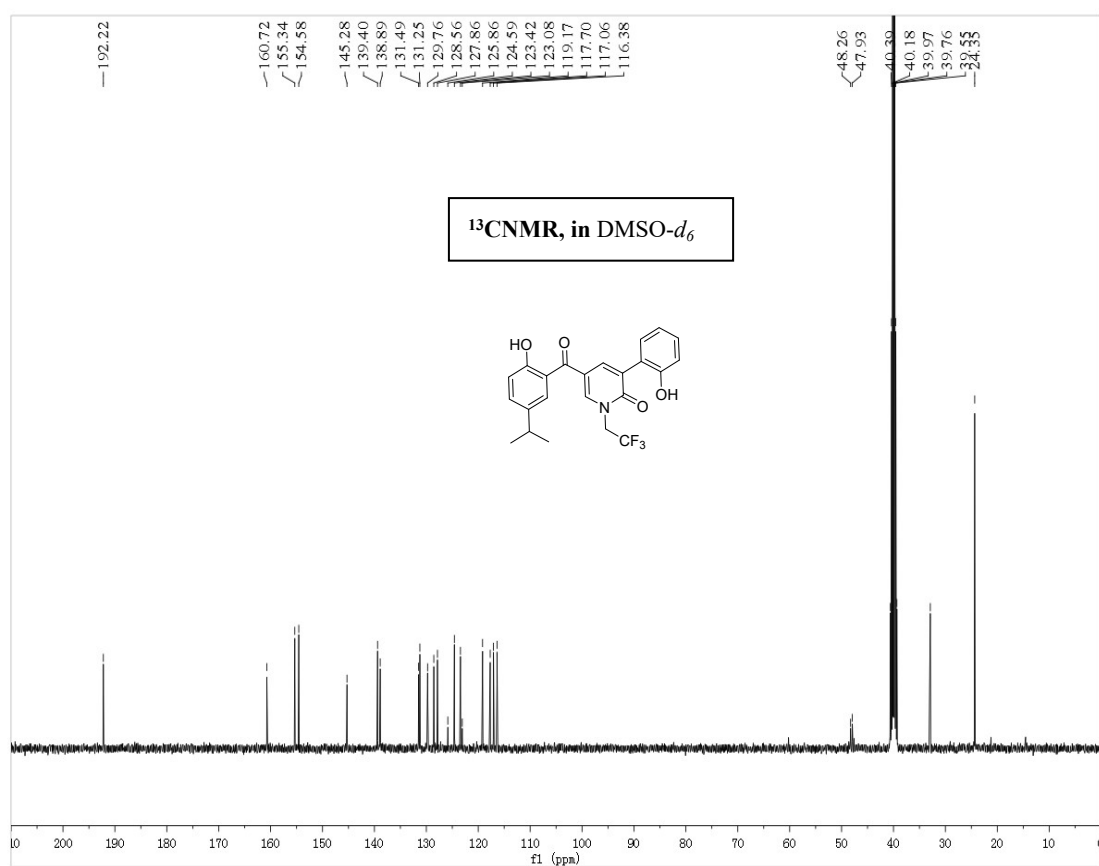

# <sup>19</sup>F NMR of 3dd

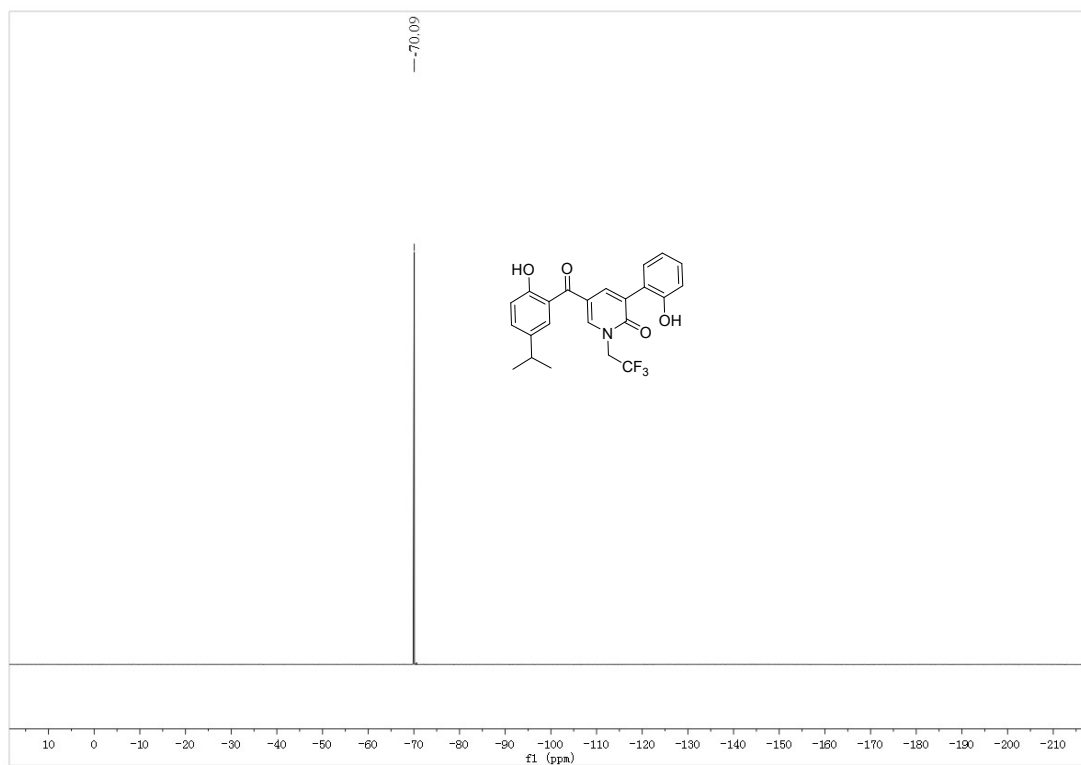



### $^1\text{H}$ and $^{13}\text{C}$ NMR of 3de

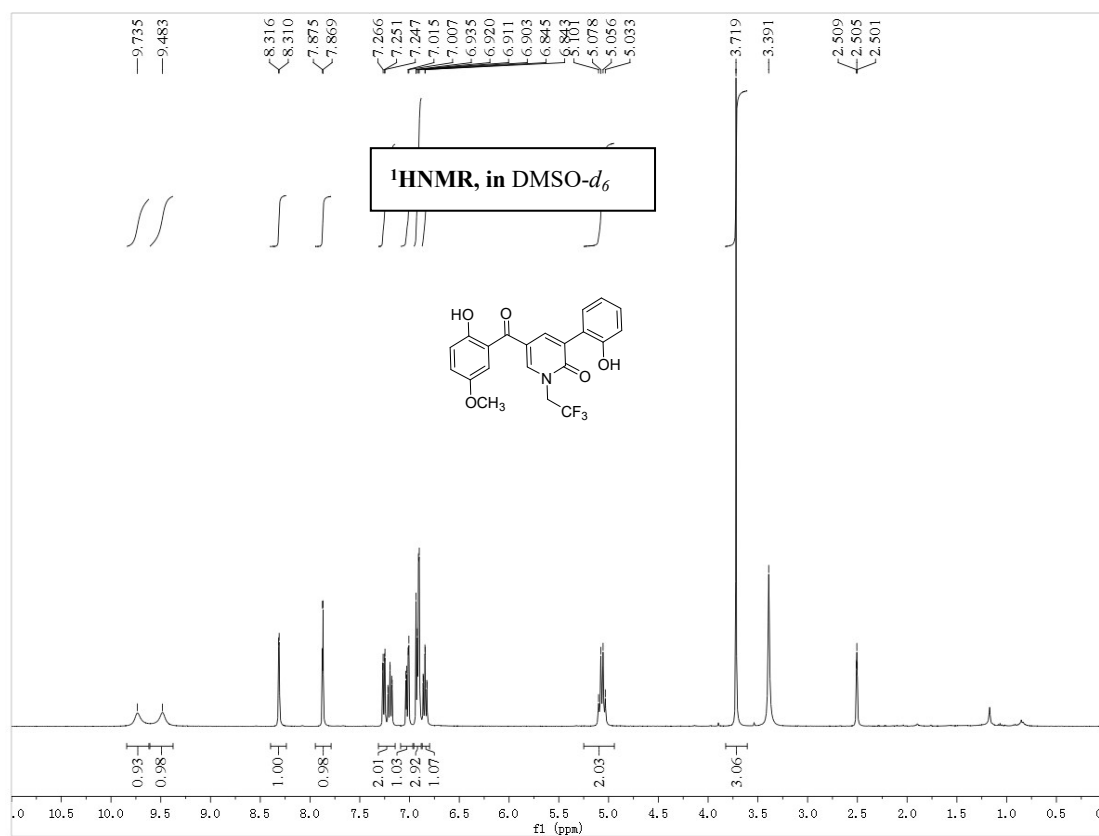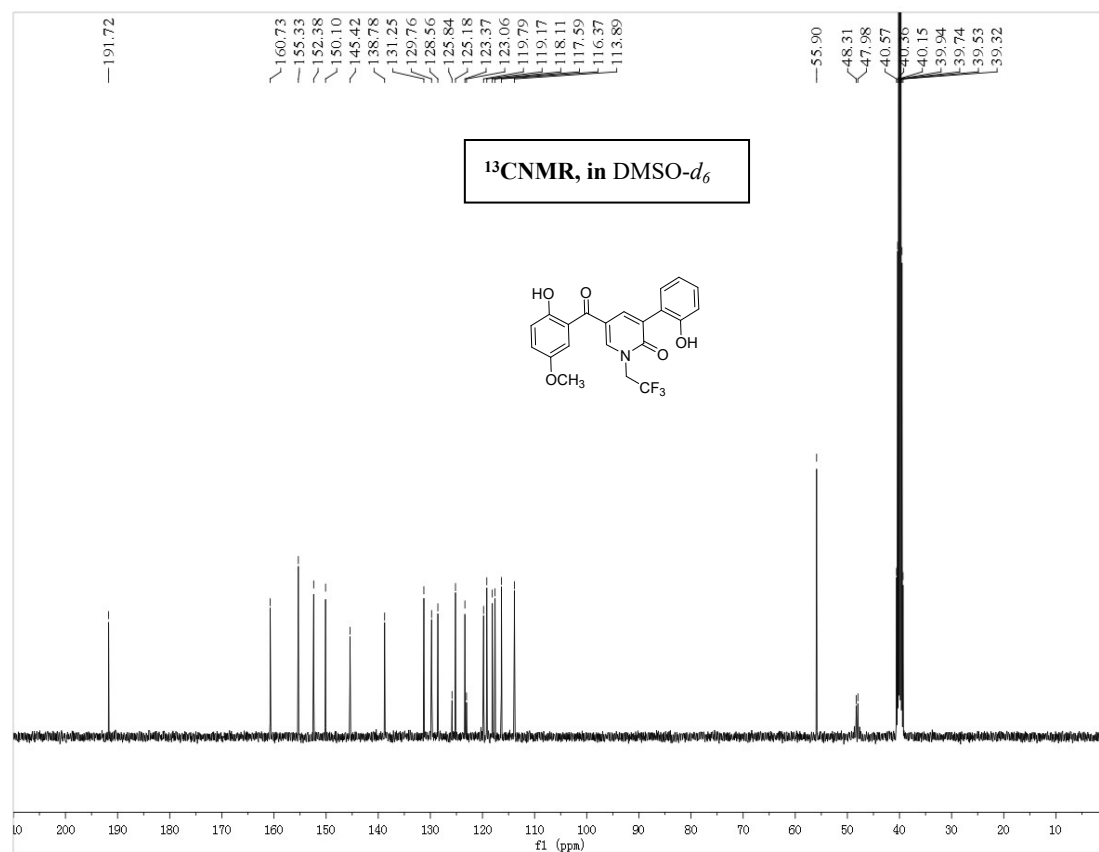

# <sup>19</sup>F NMR of 3de

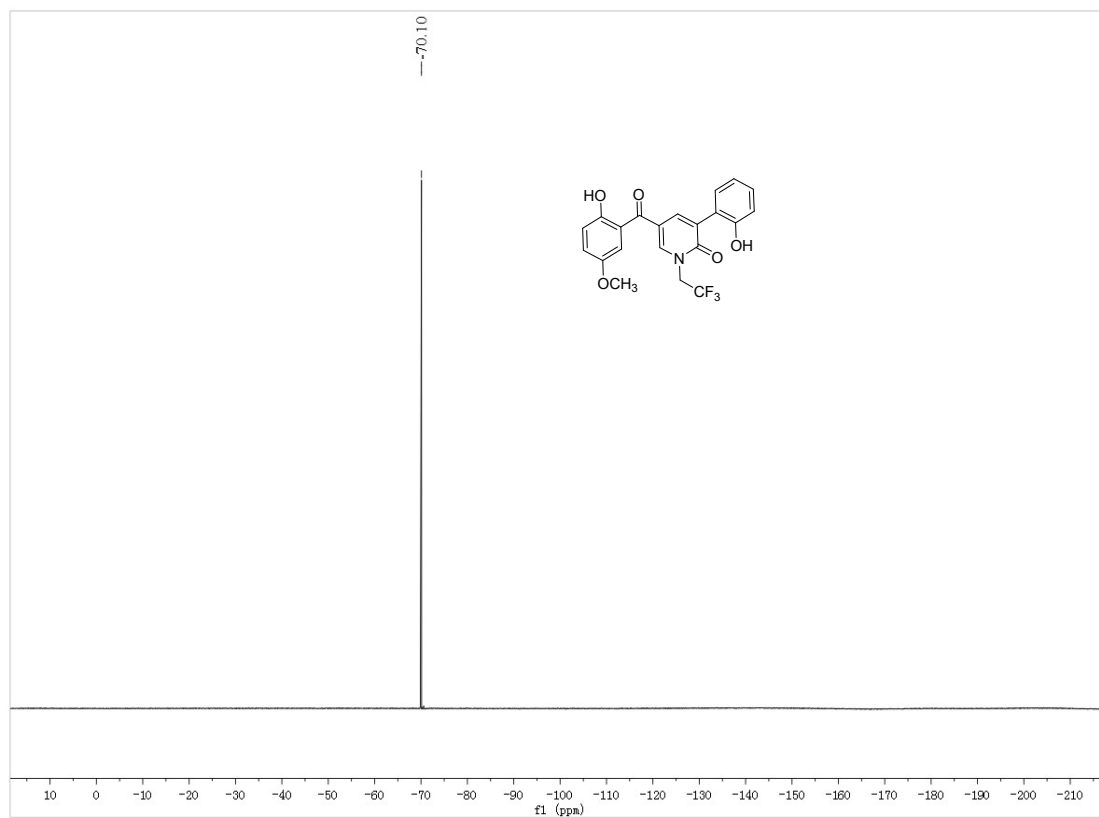

### <sup>1</sup>H and <sup>13</sup>C NMR of 3df

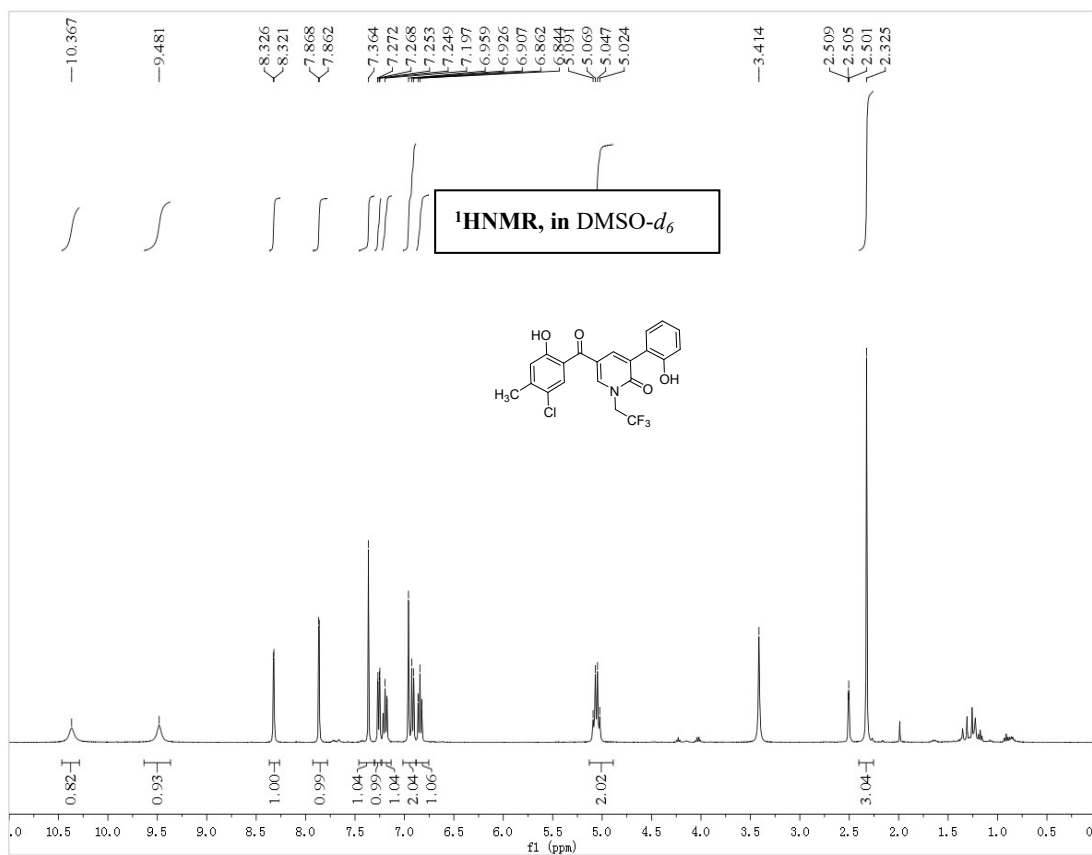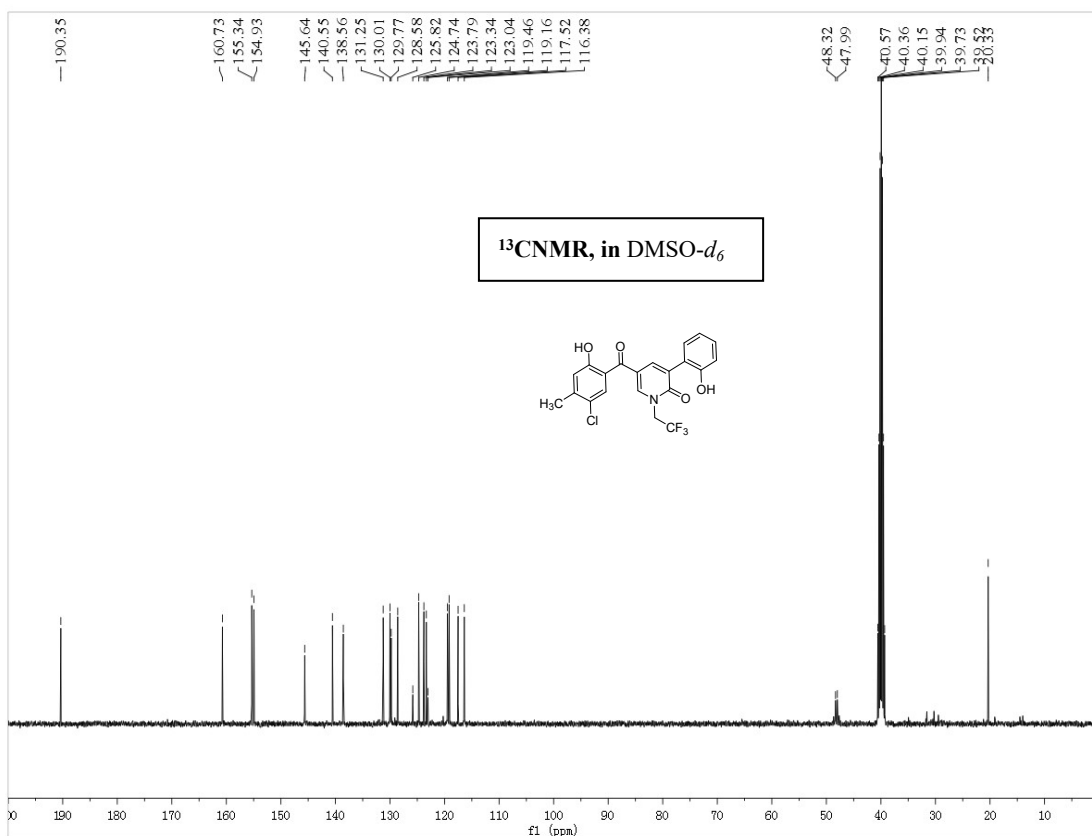

# <sup>19</sup>F NMR of 3df

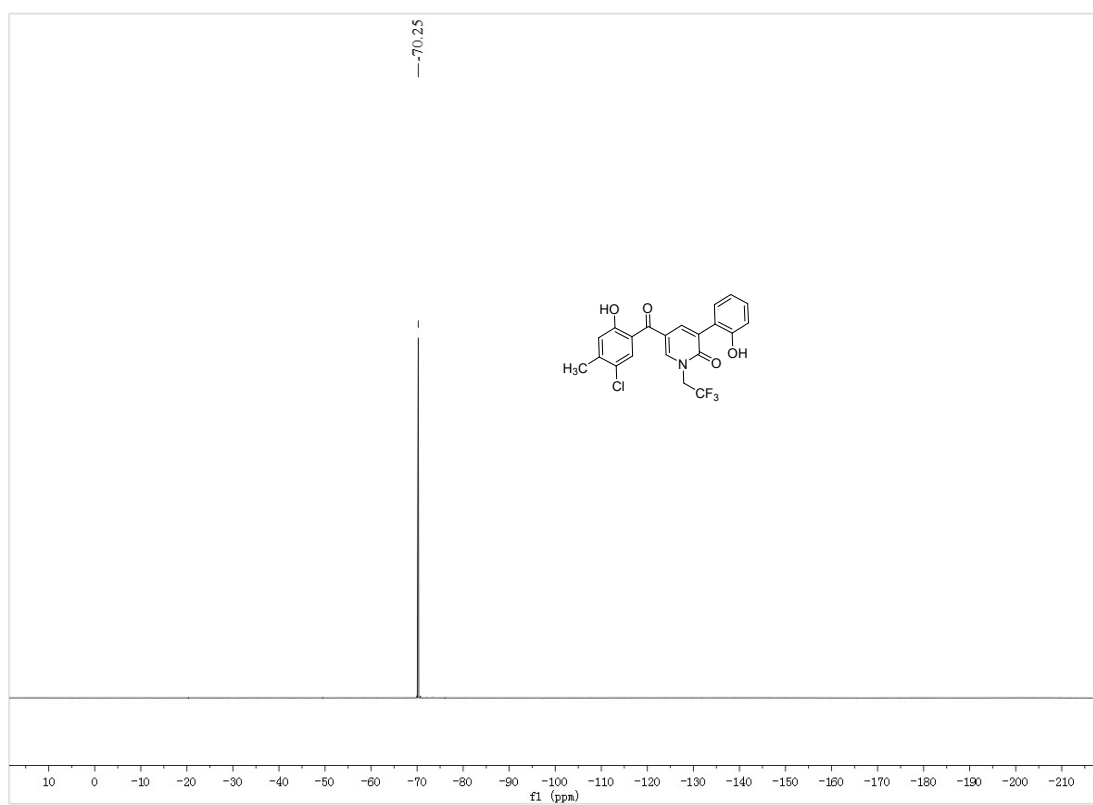

# <sup>1</sup>H and <sup>13</sup>C NMR of 3dg

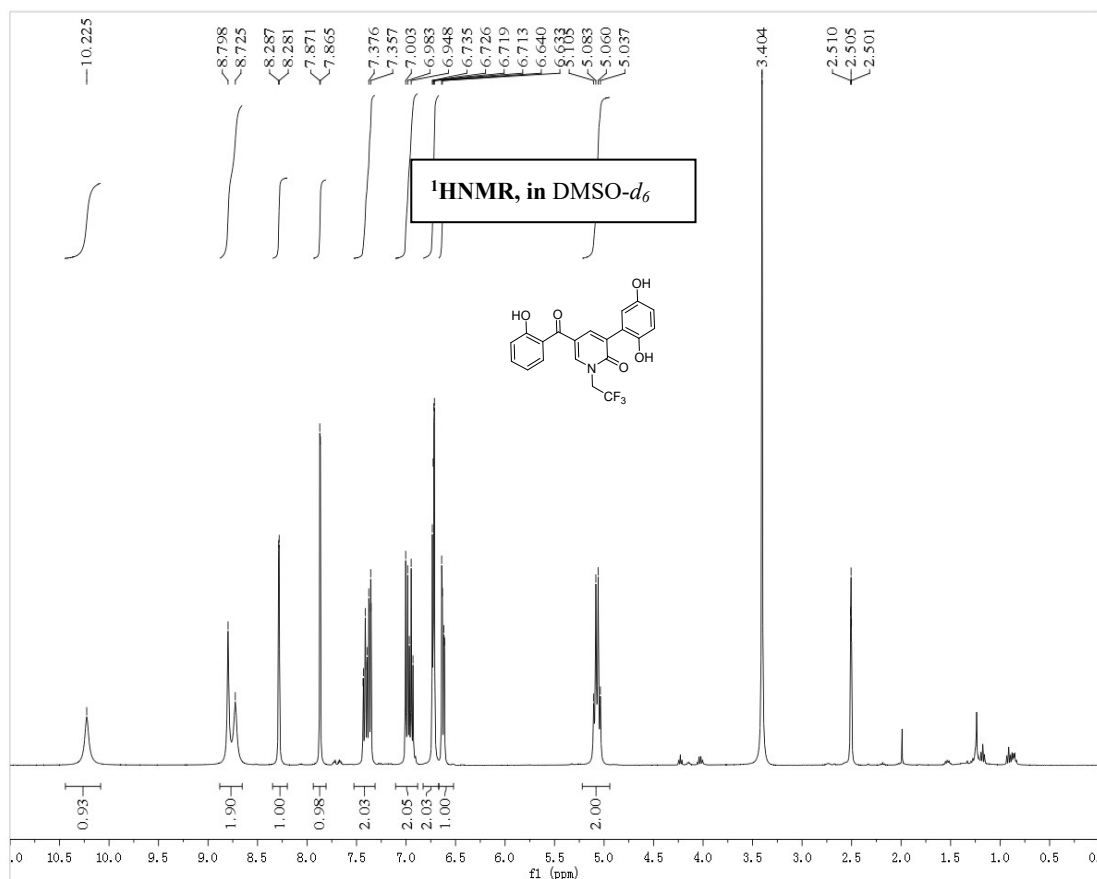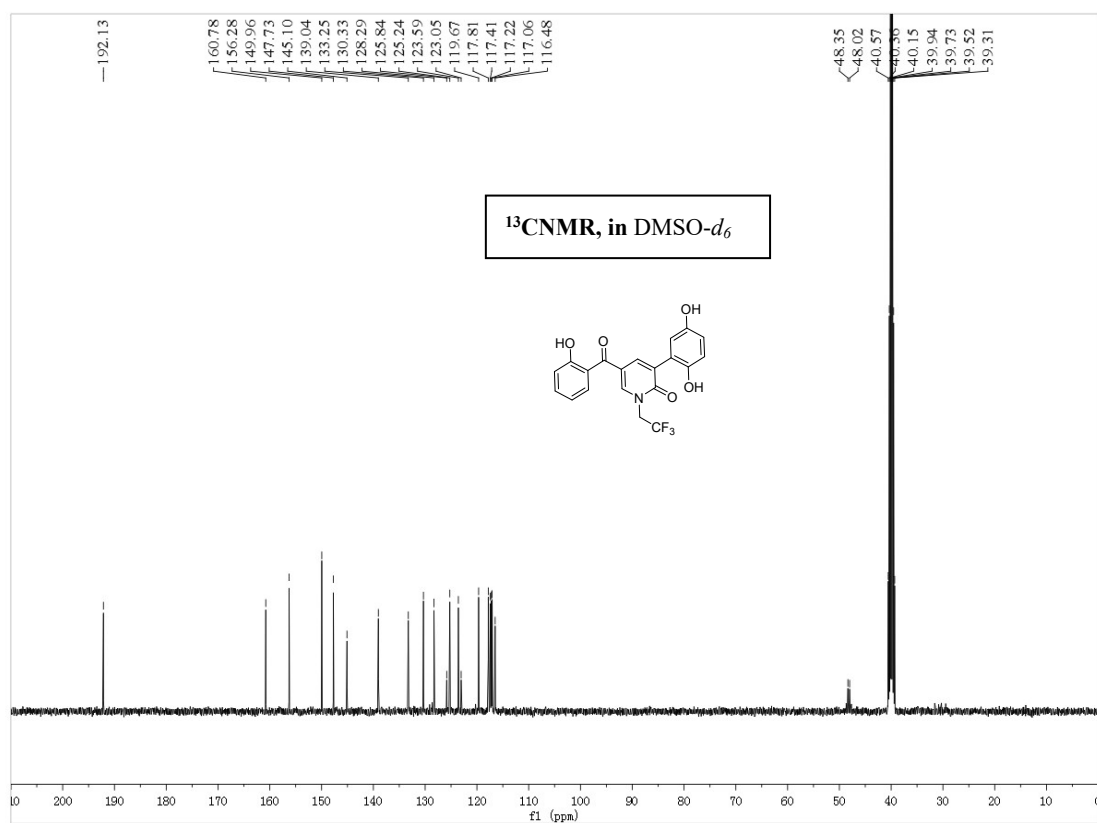

### <sup>19</sup>F NMR of 3dg

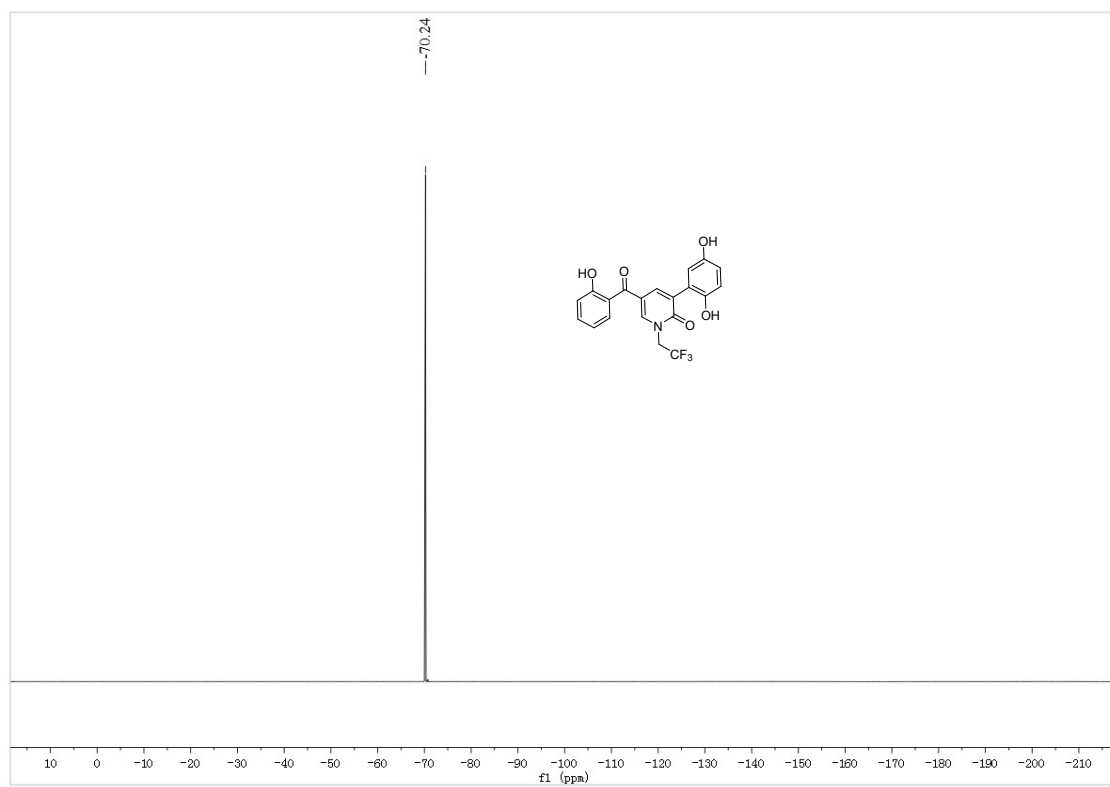

# <sup>1</sup>H and <sup>13</sup>C NMR of 3dh

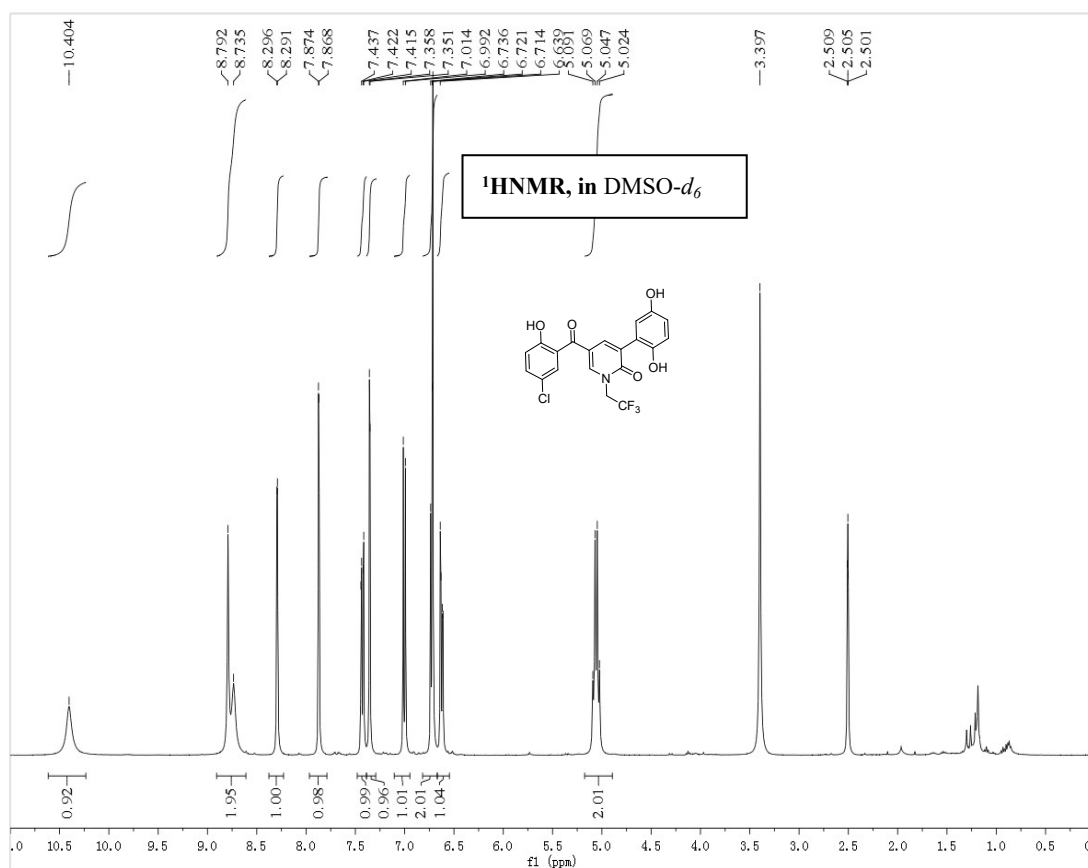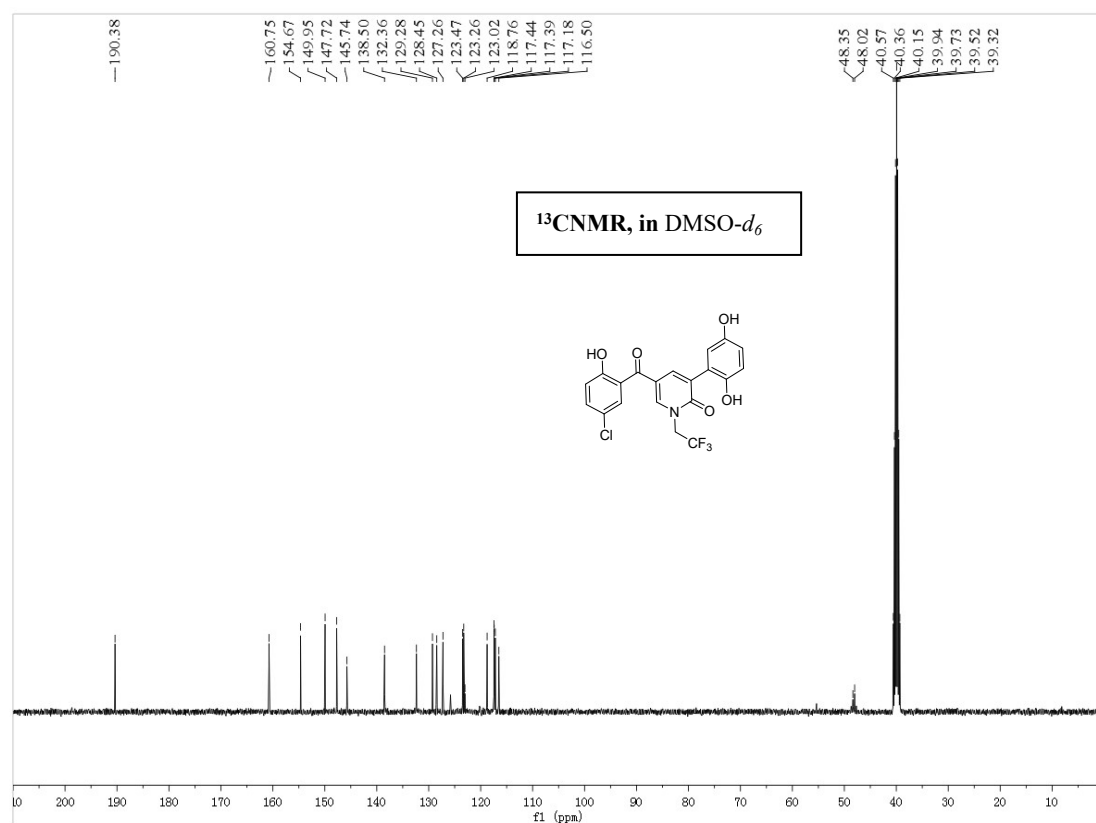

# <sup>19</sup>F NMR of 3dh

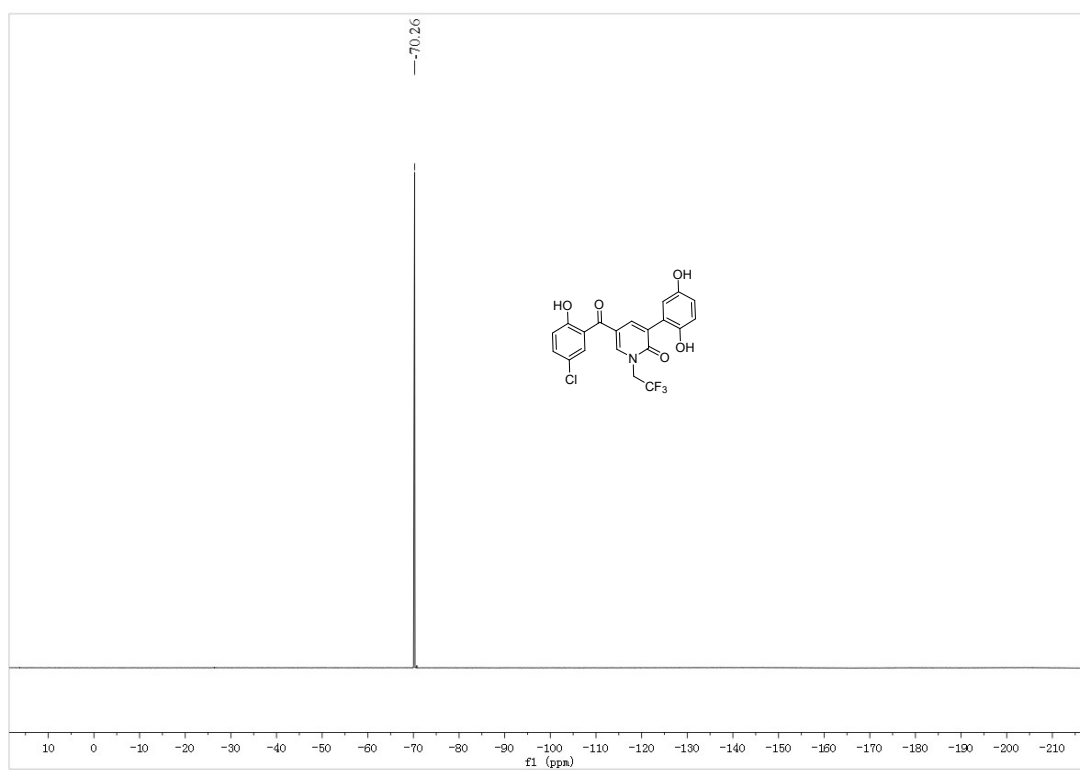



# <sup>1</sup>H and <sup>13</sup>C NMR of 3di

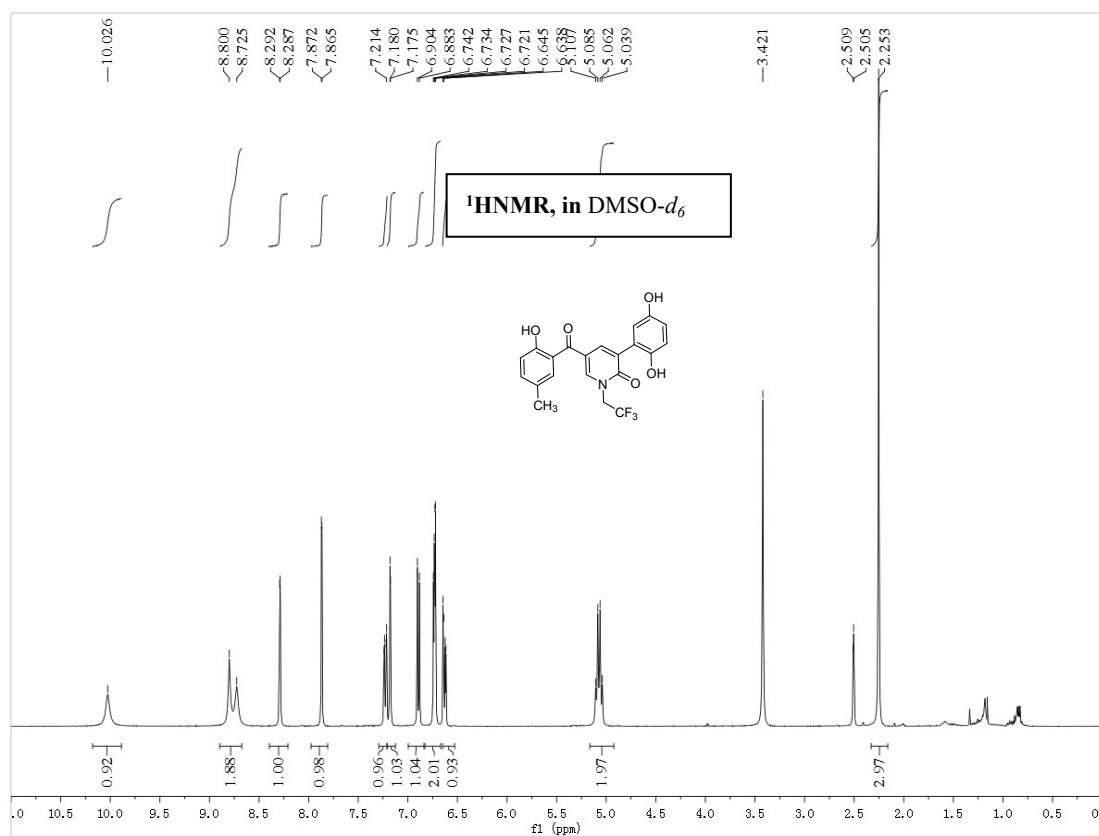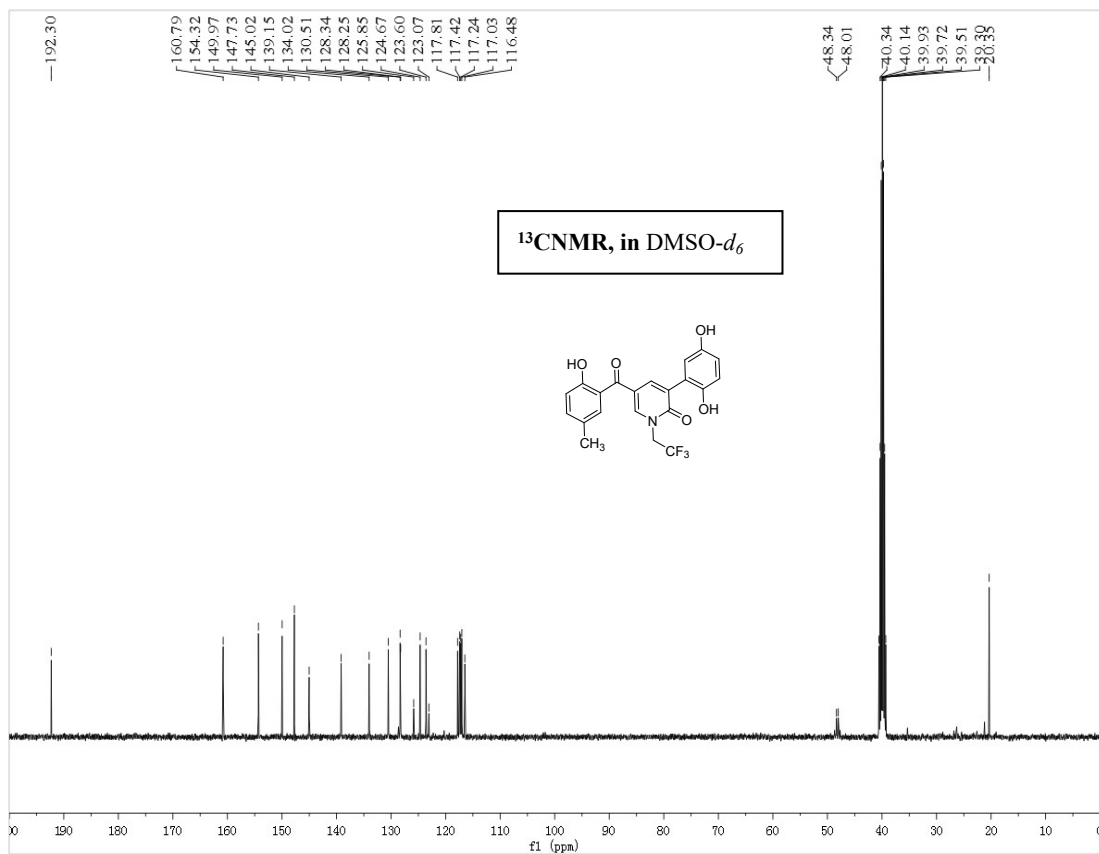

# <sup>19</sup>F NMR of 3di

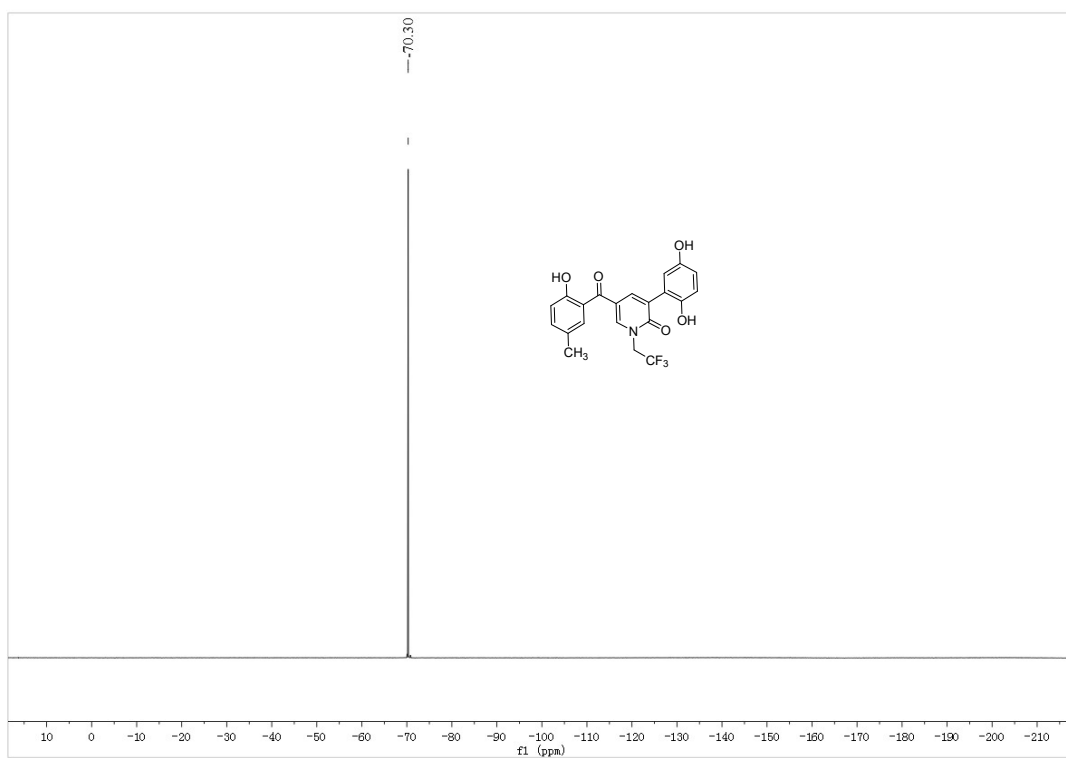

### <sup>1</sup>H and <sup>13</sup>C NMR of 3ea

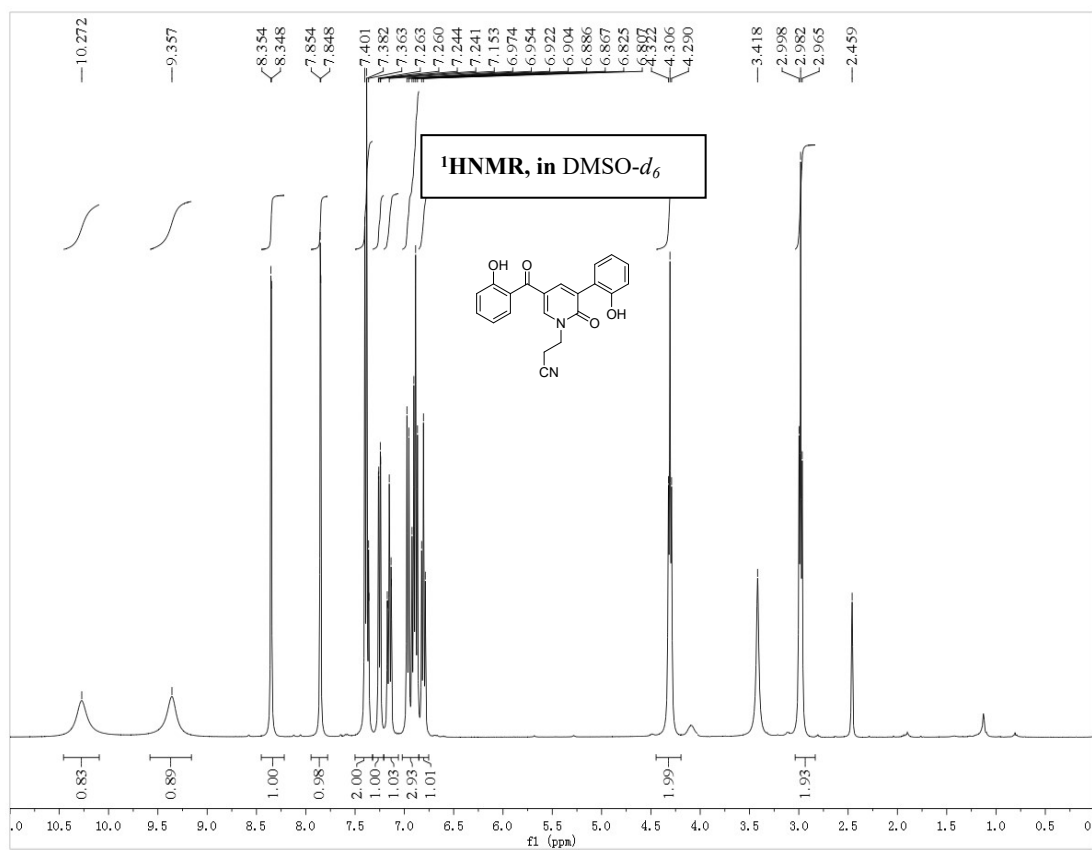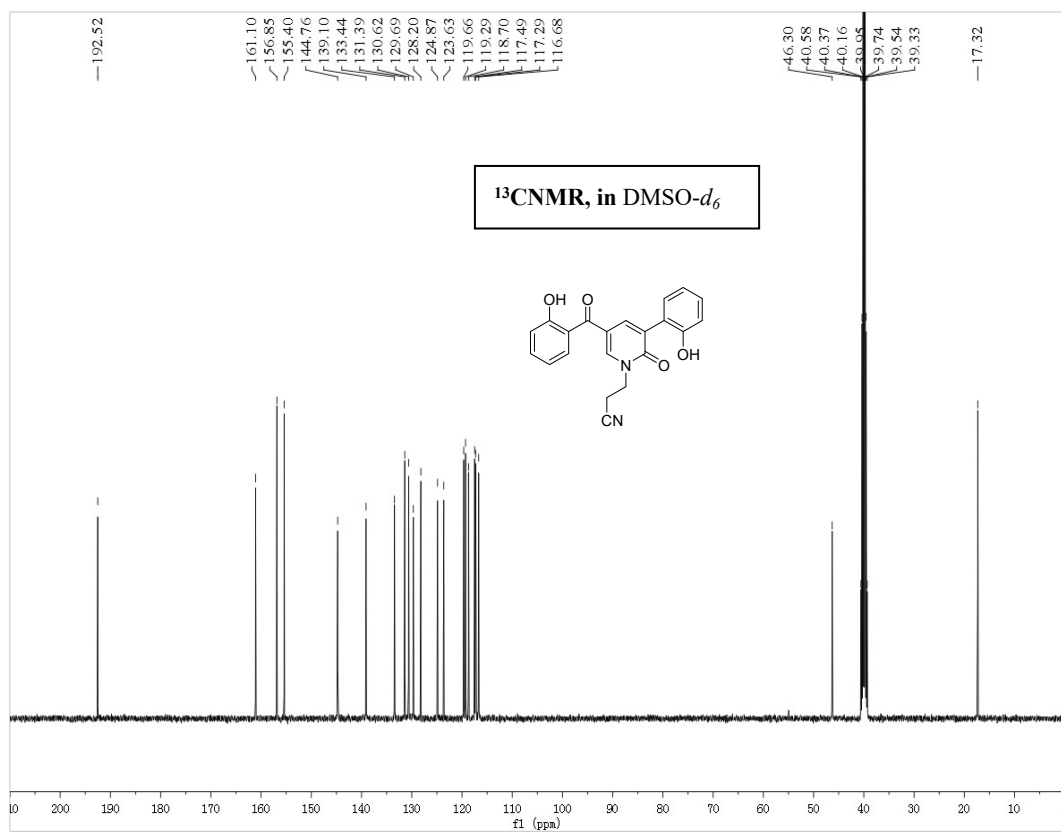

### $^1\text{H}$ and $^{13}\text{C}$ NMR of 3fa

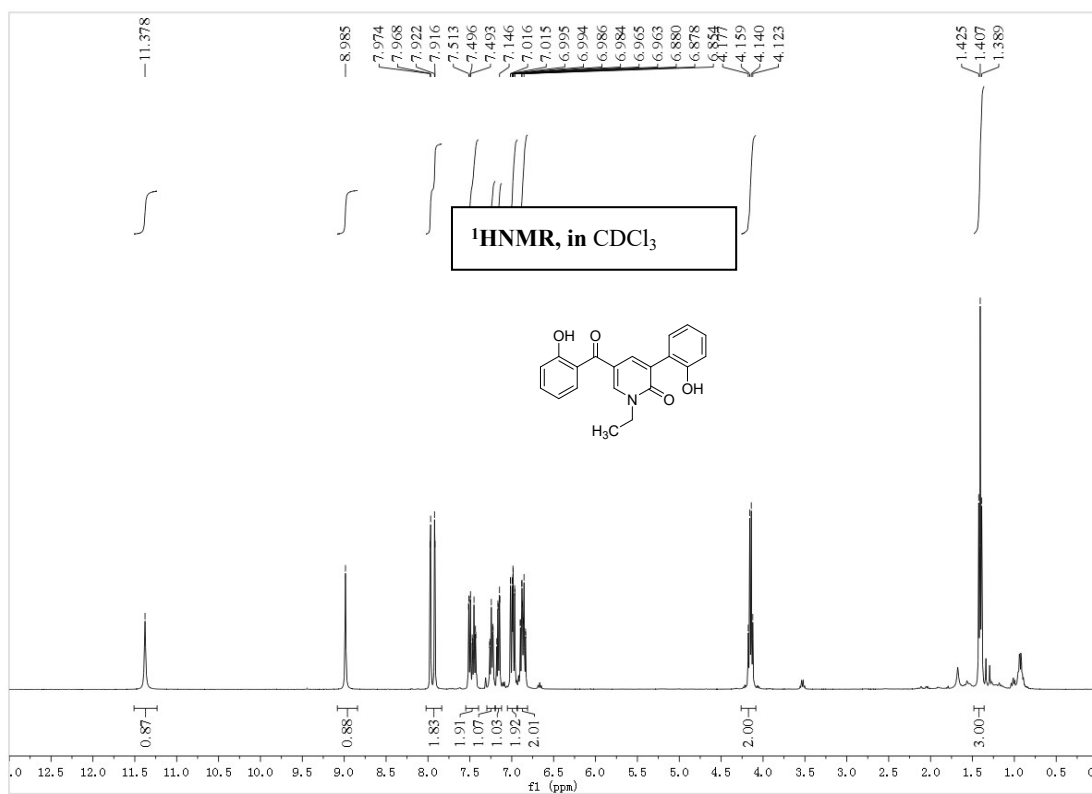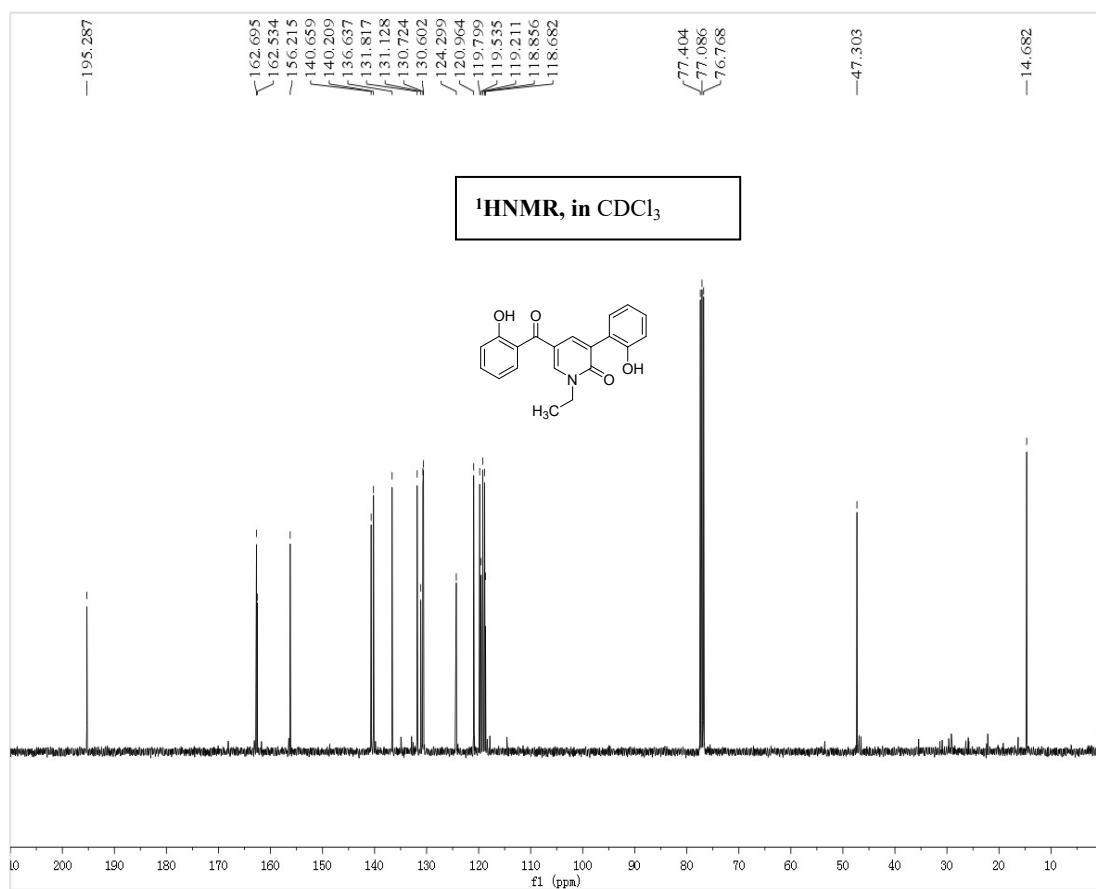

### <sup>1</sup>H and <sup>13</sup>C NMR of 3ga

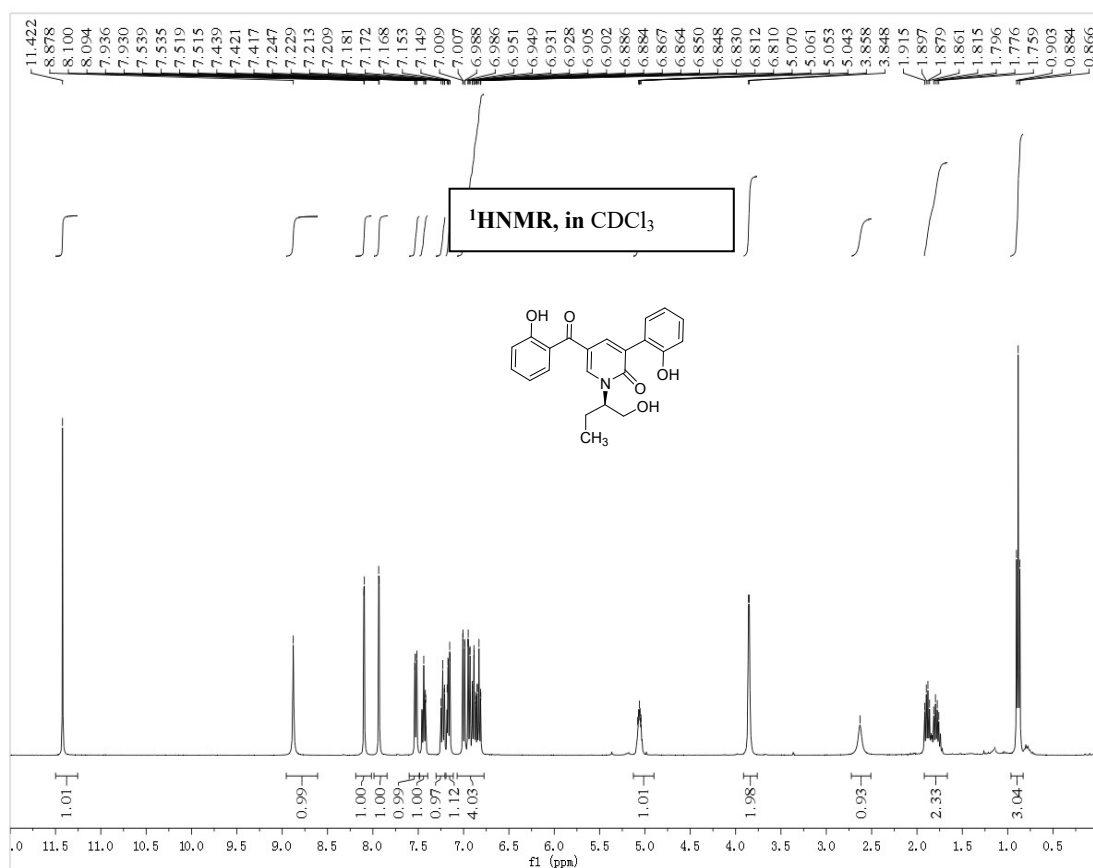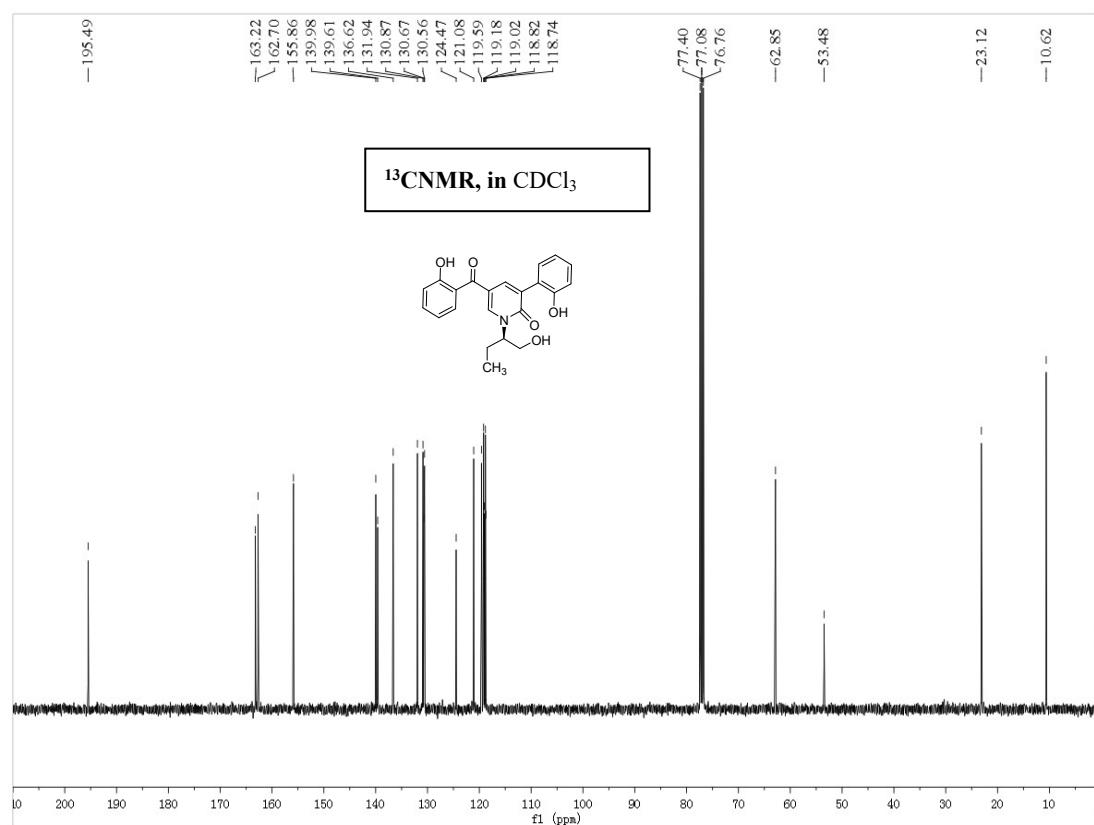

### <sup>1</sup>H and <sup>13</sup>C NMR of 3gb

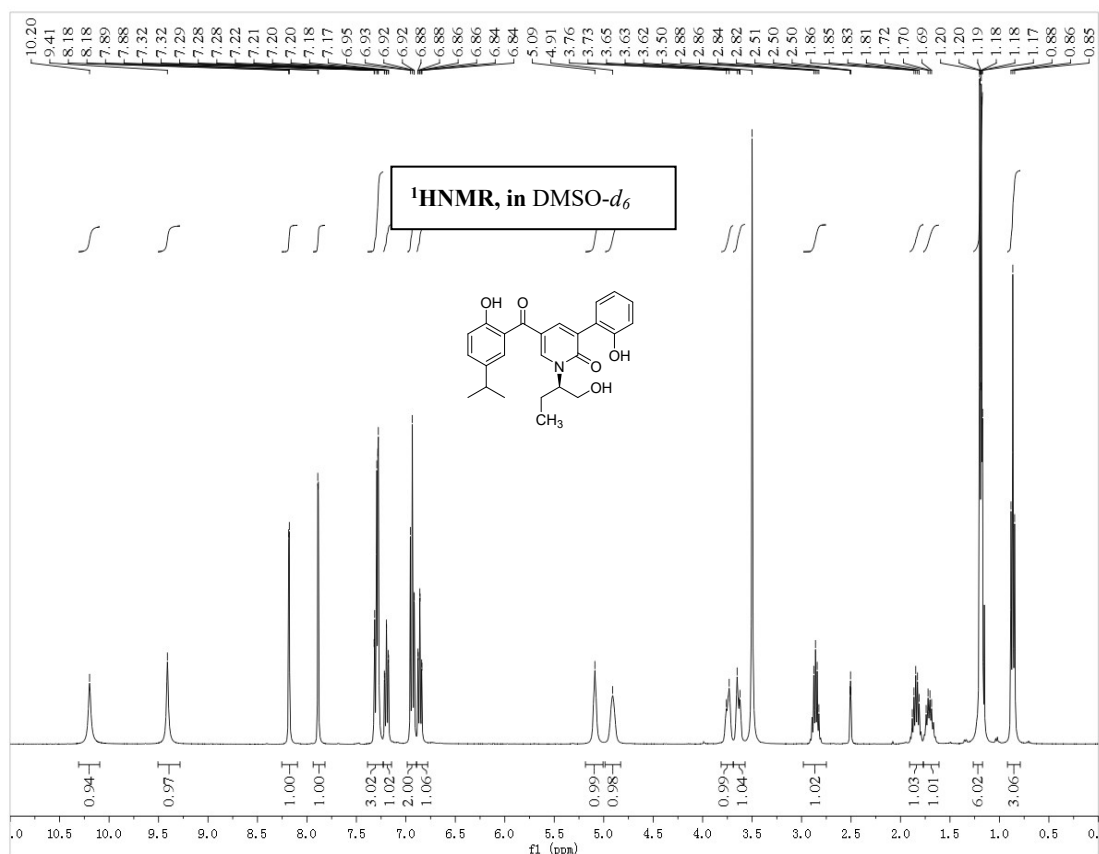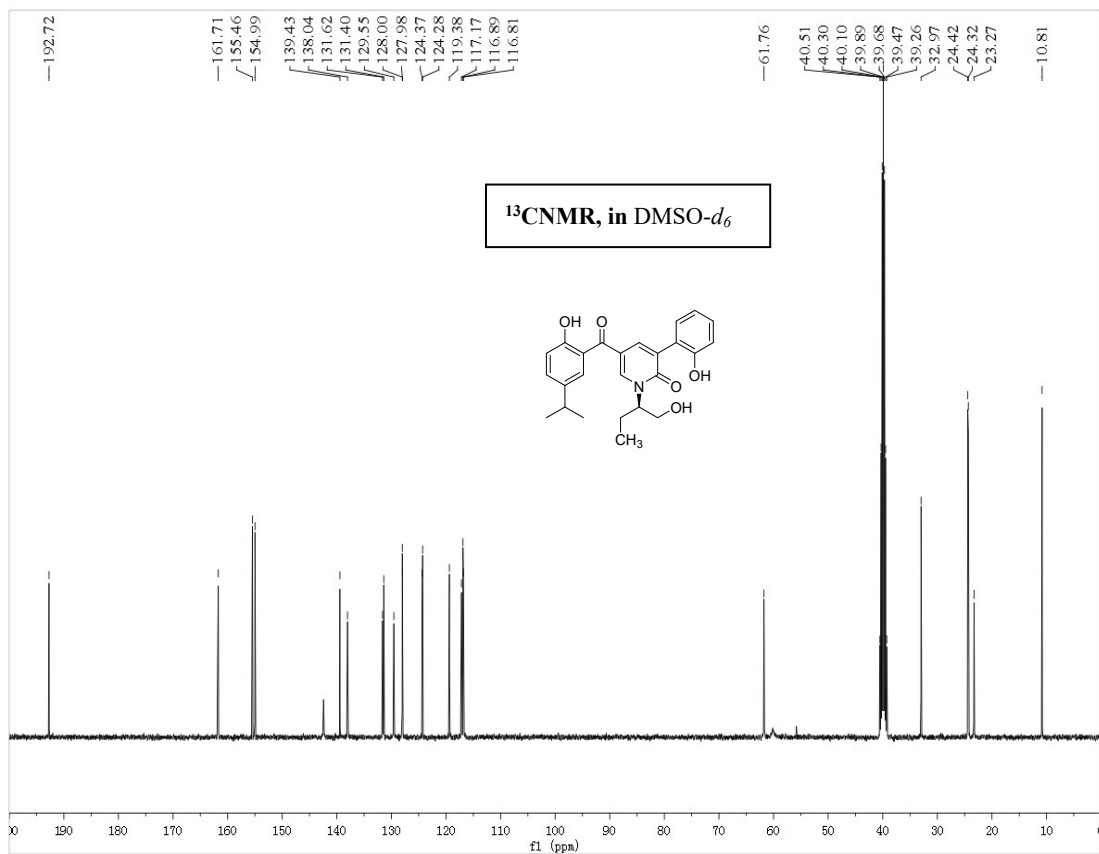

### $^1\text{H}$ and $^{13}\text{C}$ NMR of 3ha

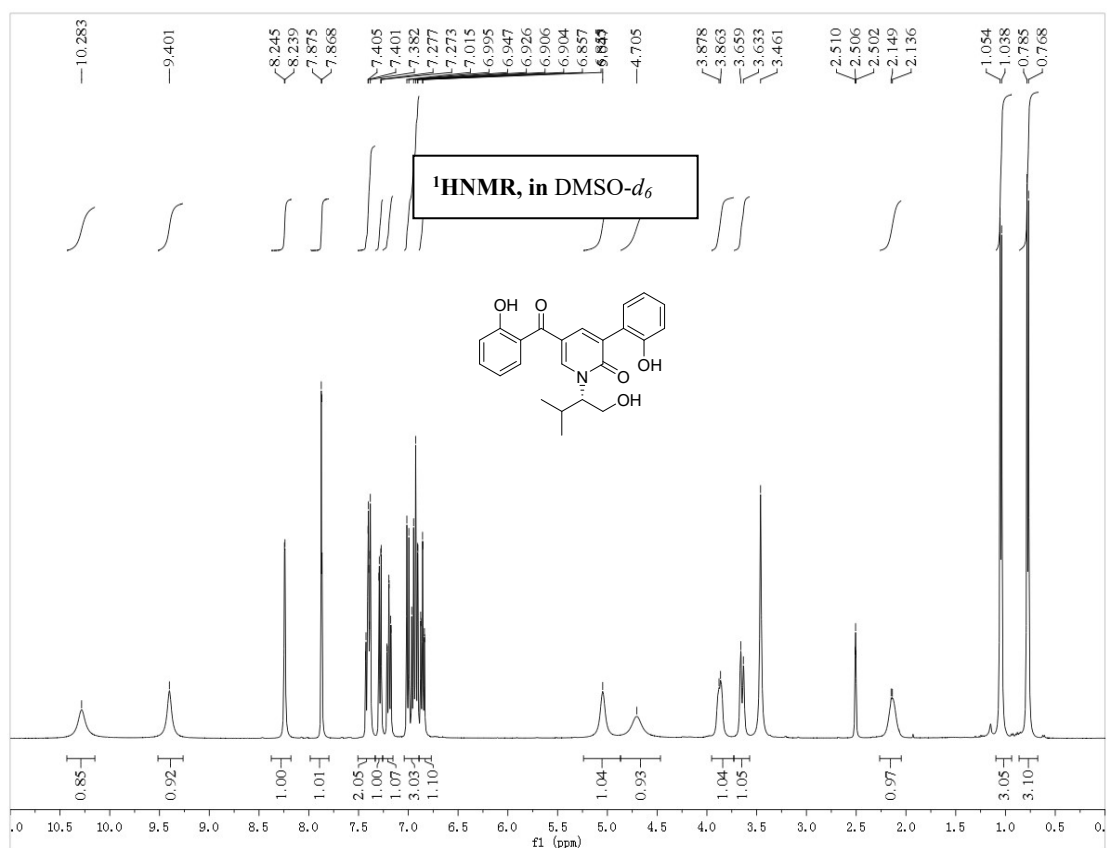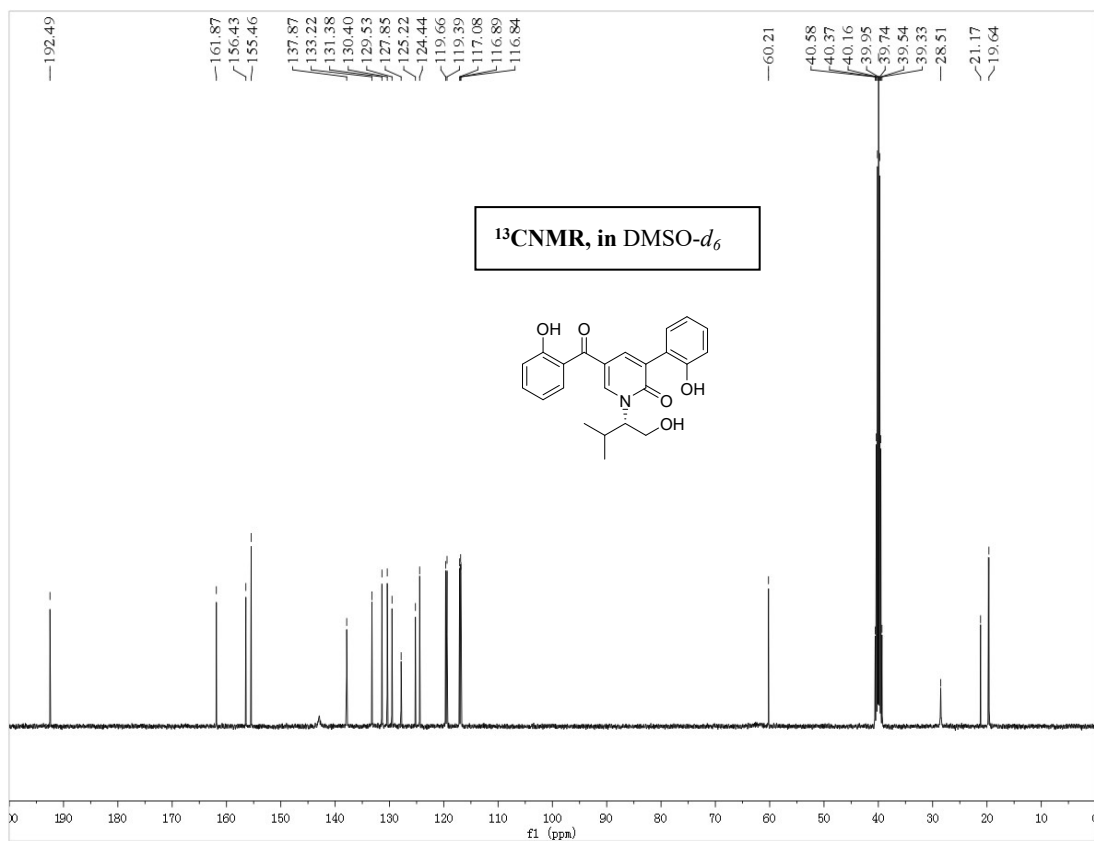

### $^1\text{H}$ and $^{13}\text{C}$ NMR of 3hb

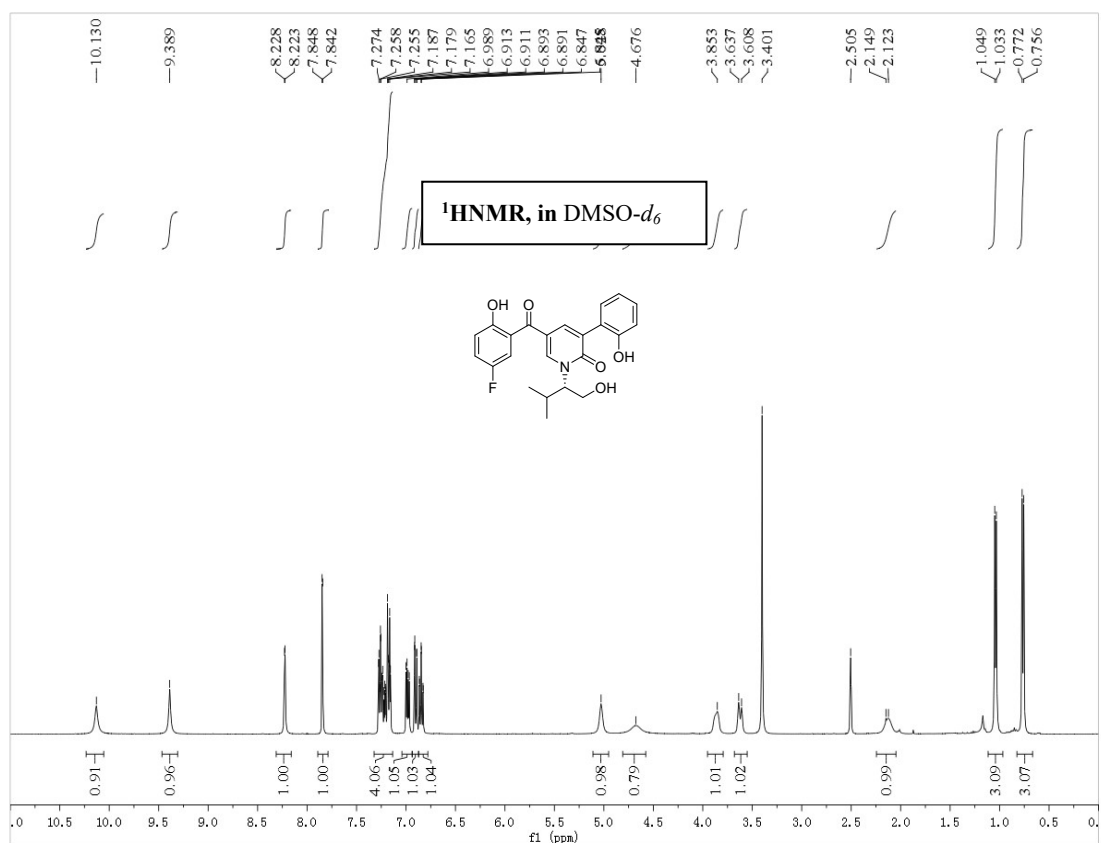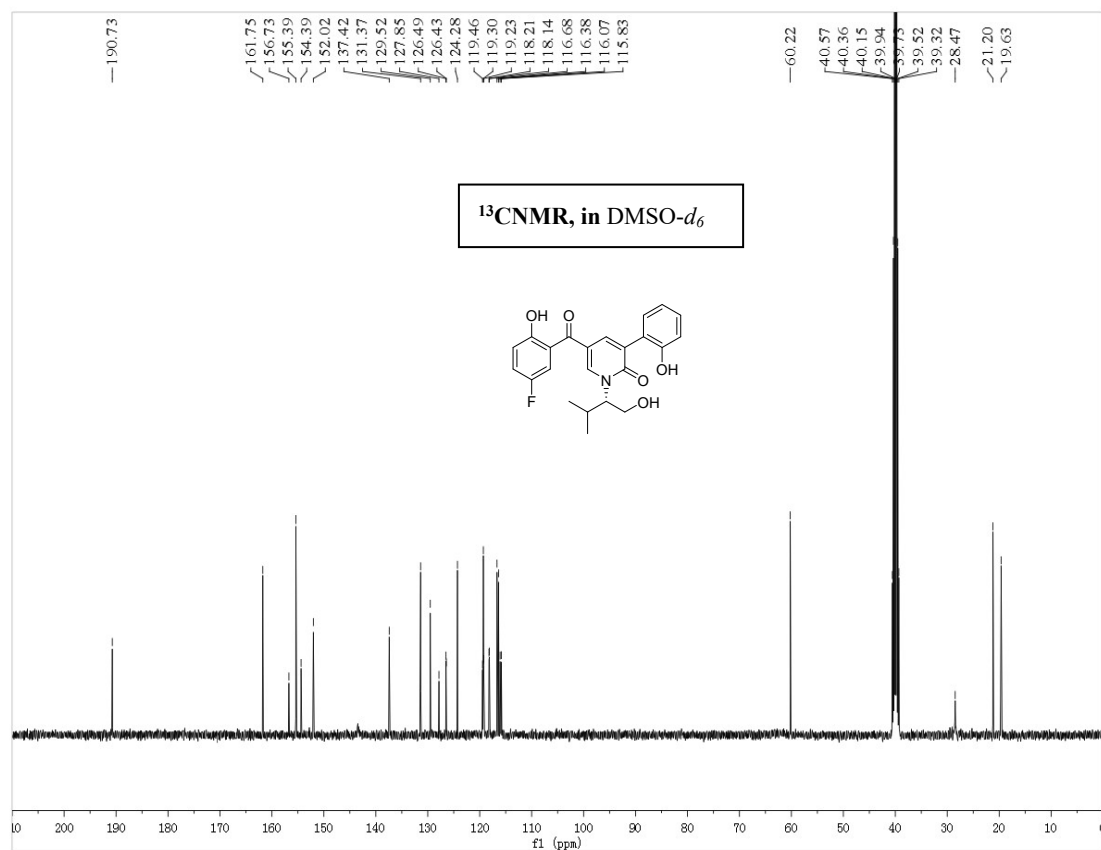



**<sup>19</sup>F NMR of 3hb**

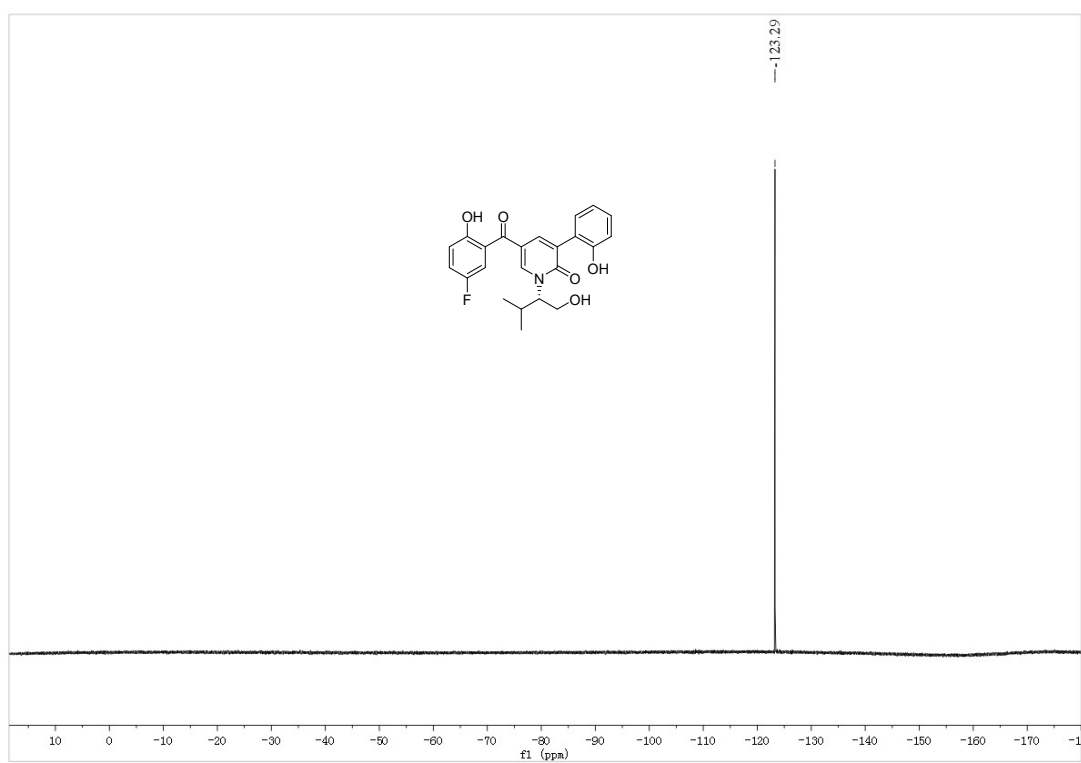

# <sup>1</sup>H and <sup>13</sup>C NMR of 3hc

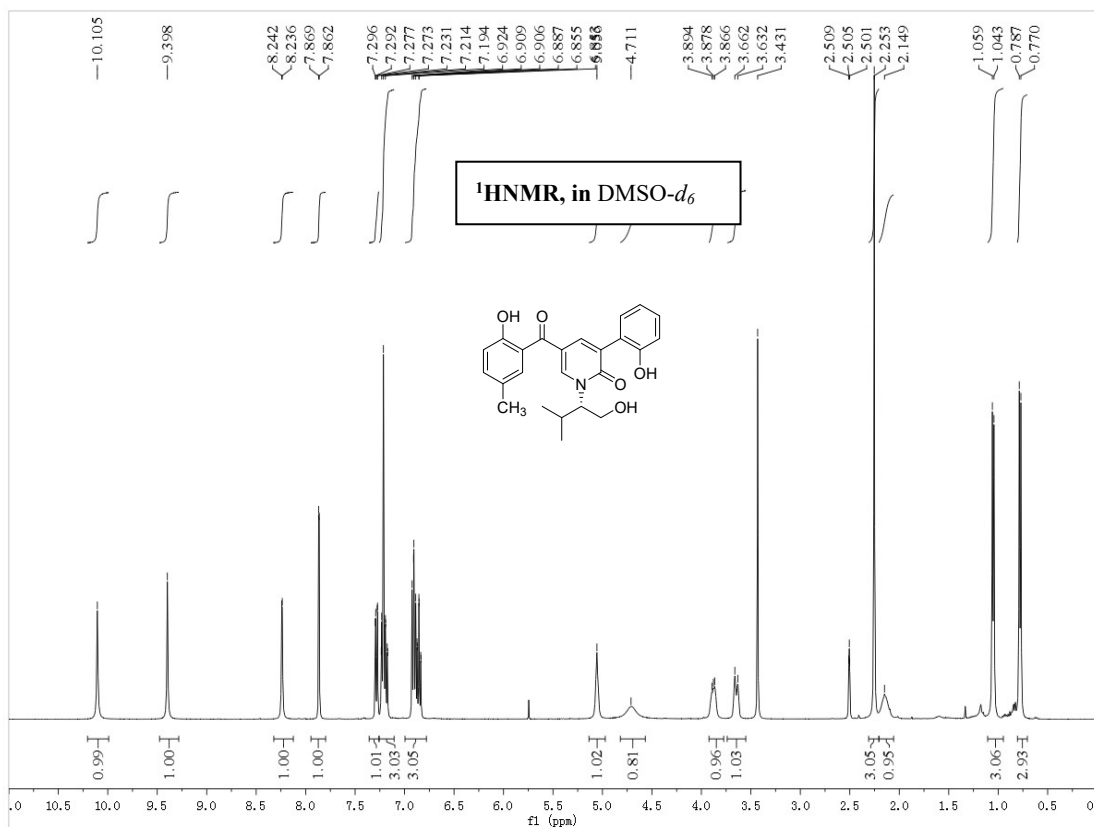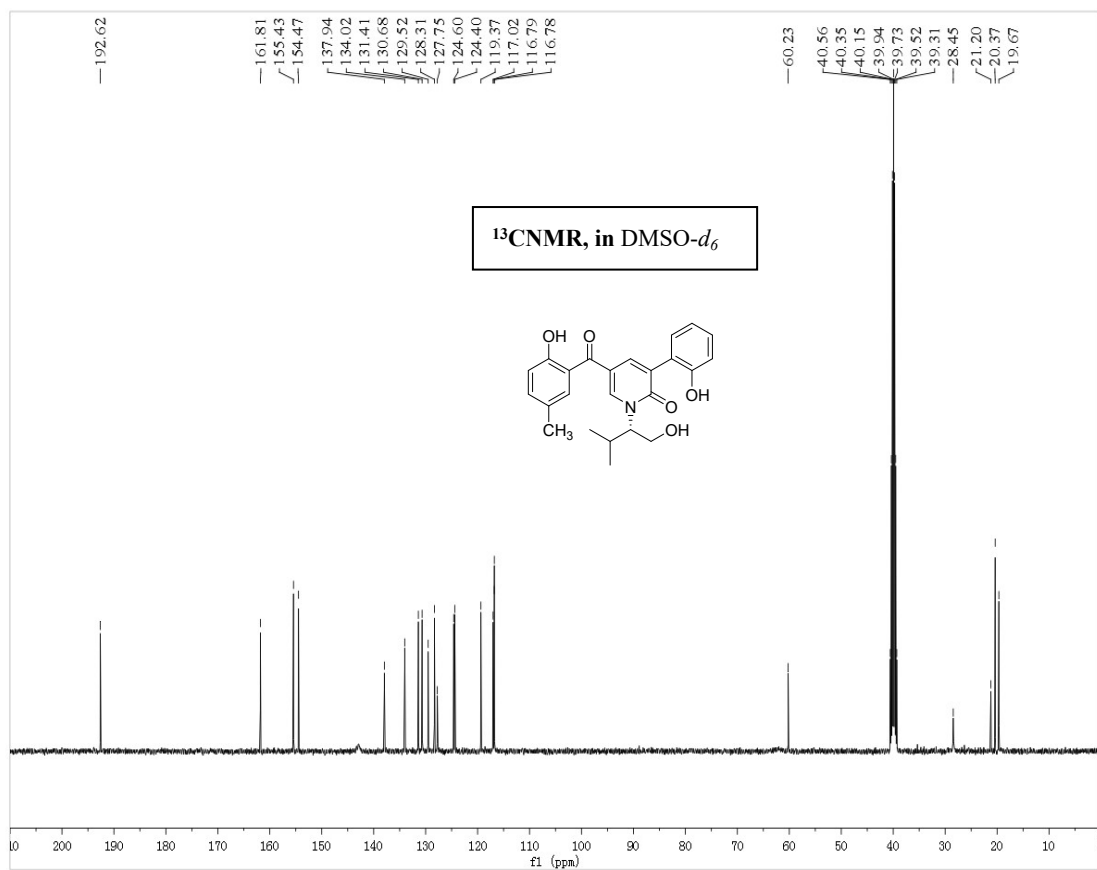

# <sup>1</sup>H and <sup>13</sup>C NMR of 3ia

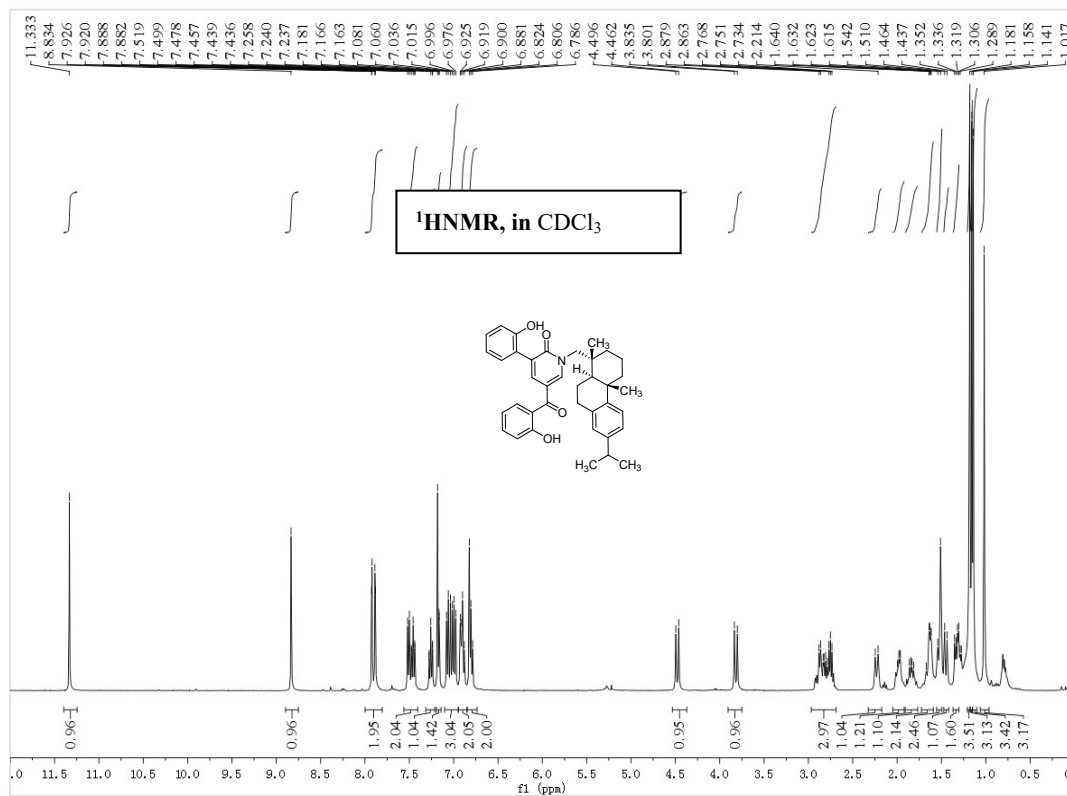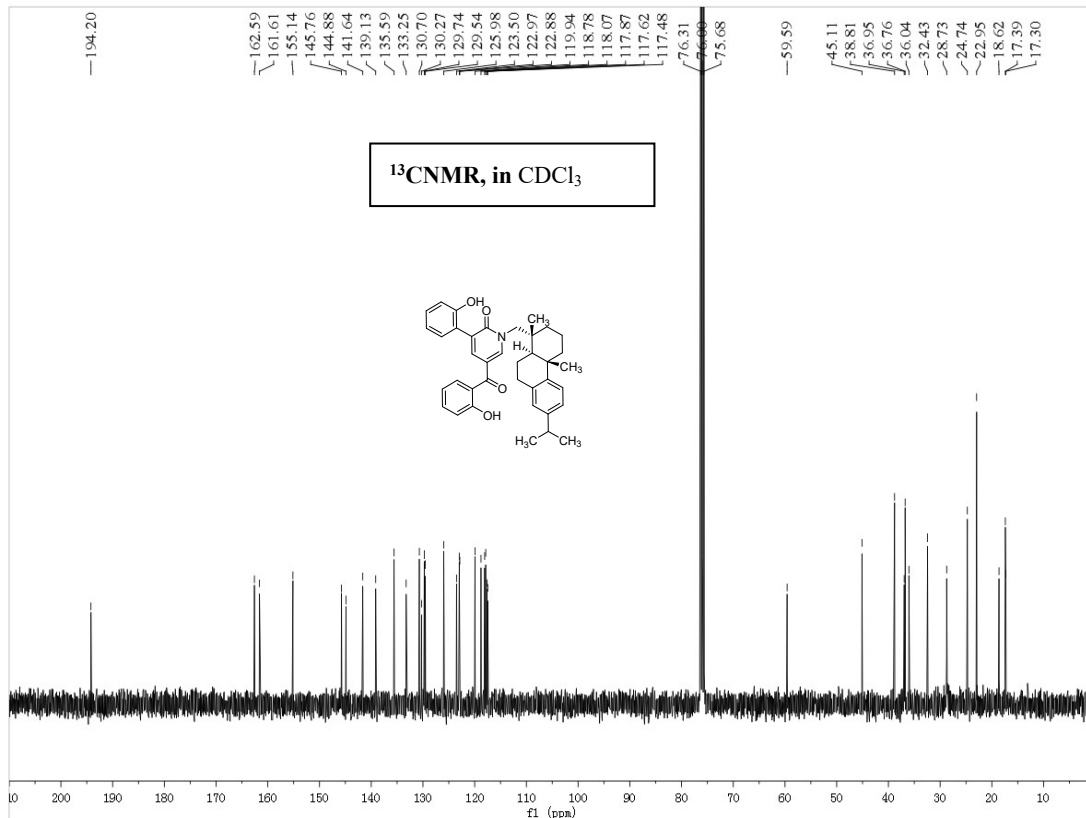

### <sup>1</sup>H and <sup>13</sup>C NMR of 3ib

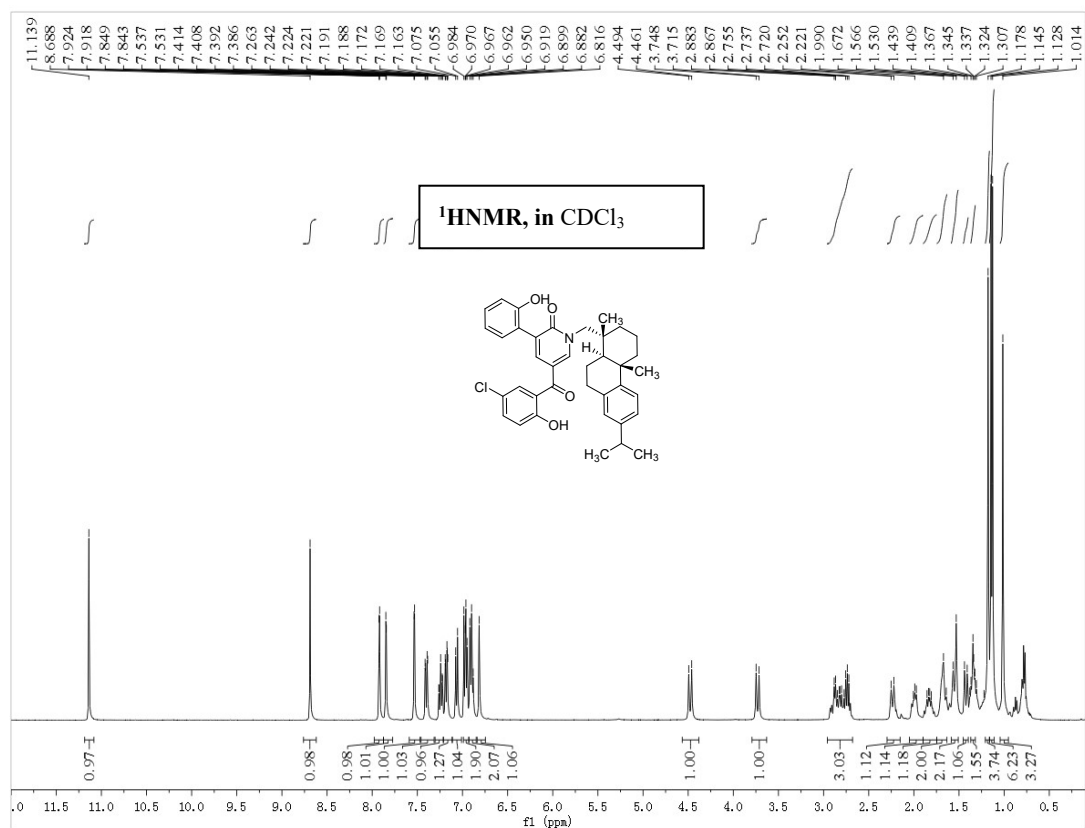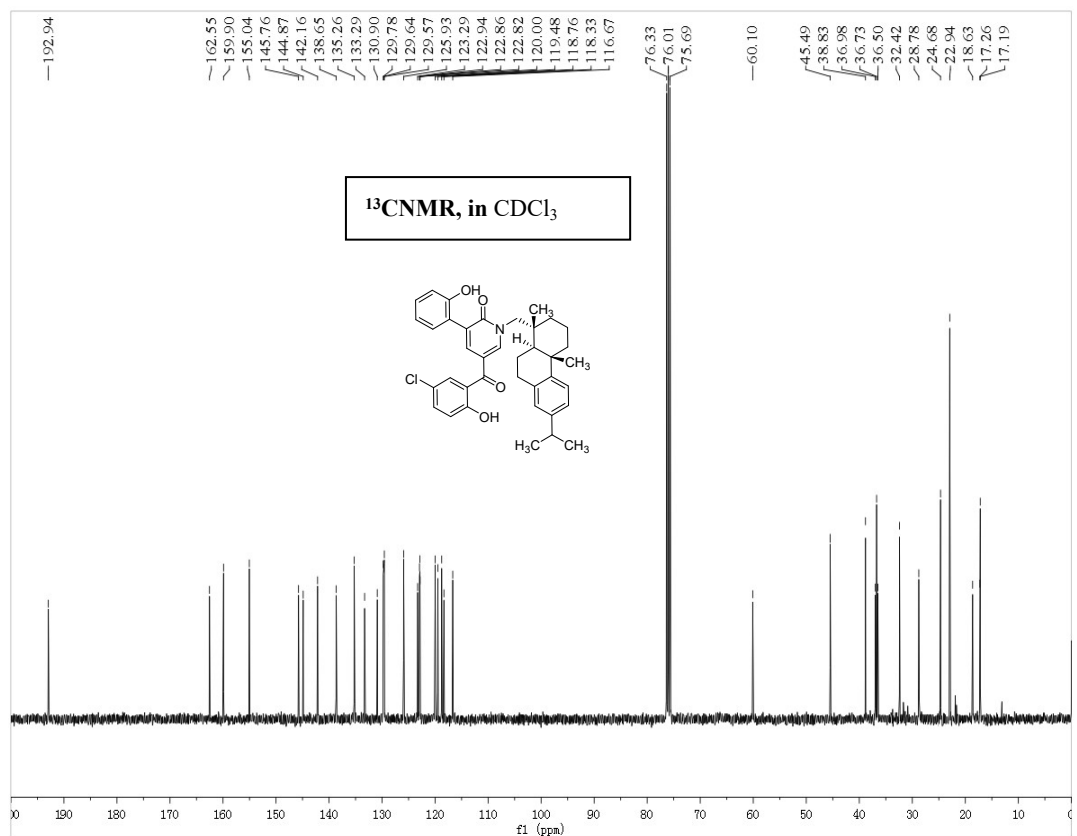

### $^1\text{H}$ and $^{13}\text{C}$ NMR of 3ic

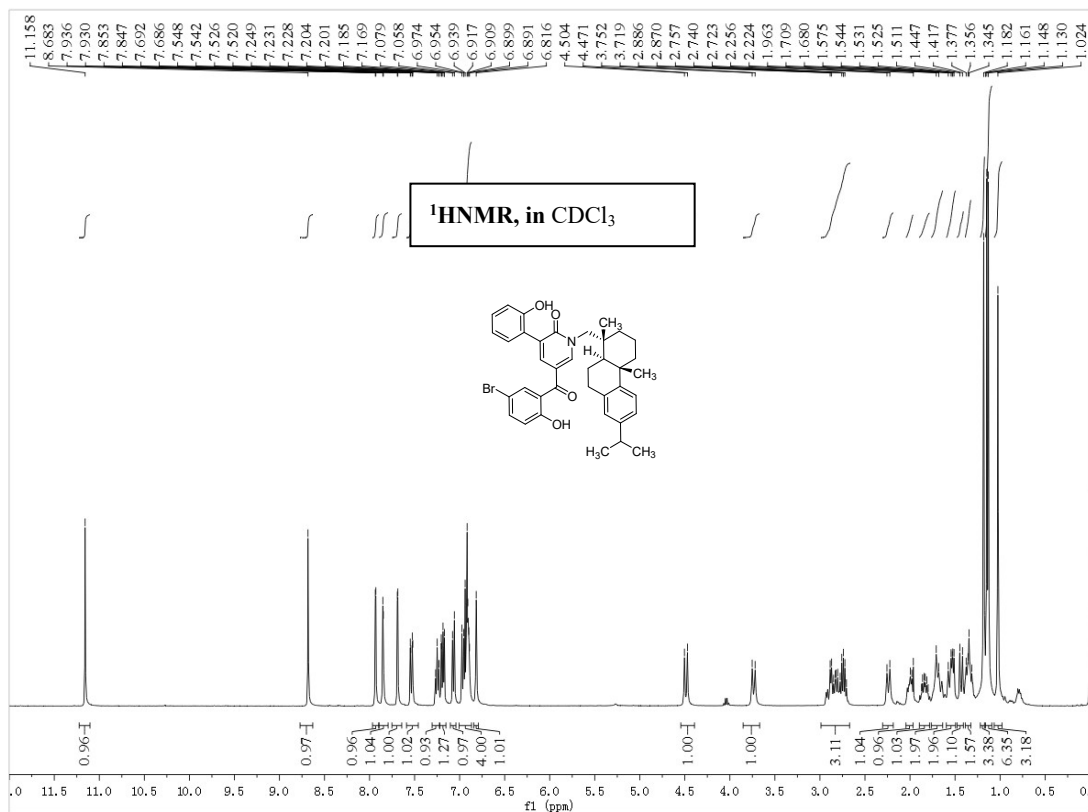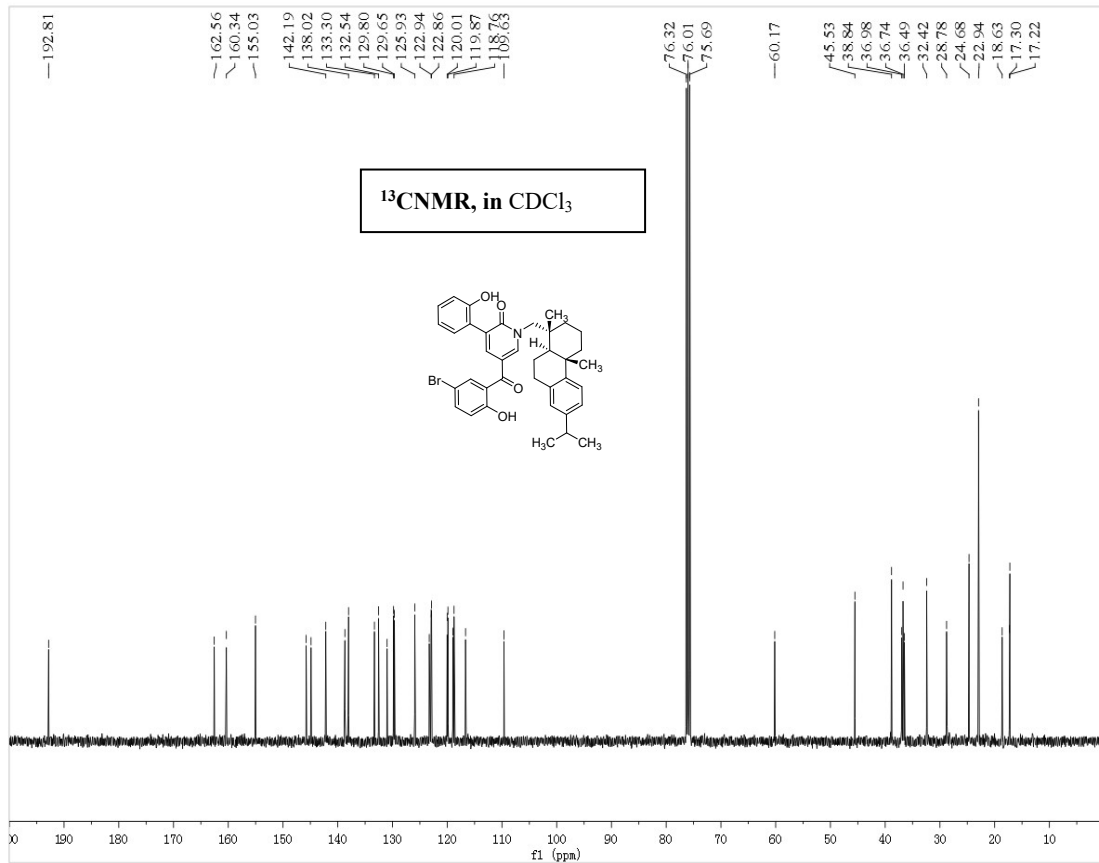

### <sup>1</sup>H and <sup>13</sup>C NMR of 4a

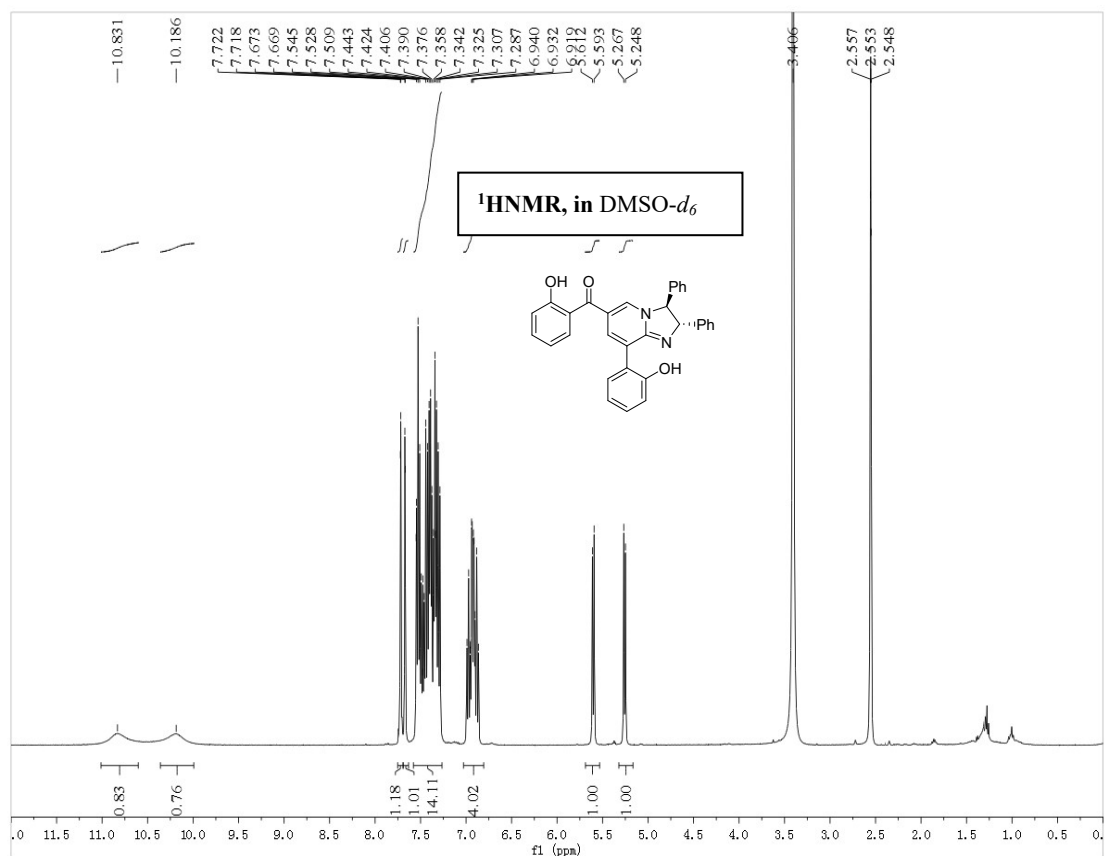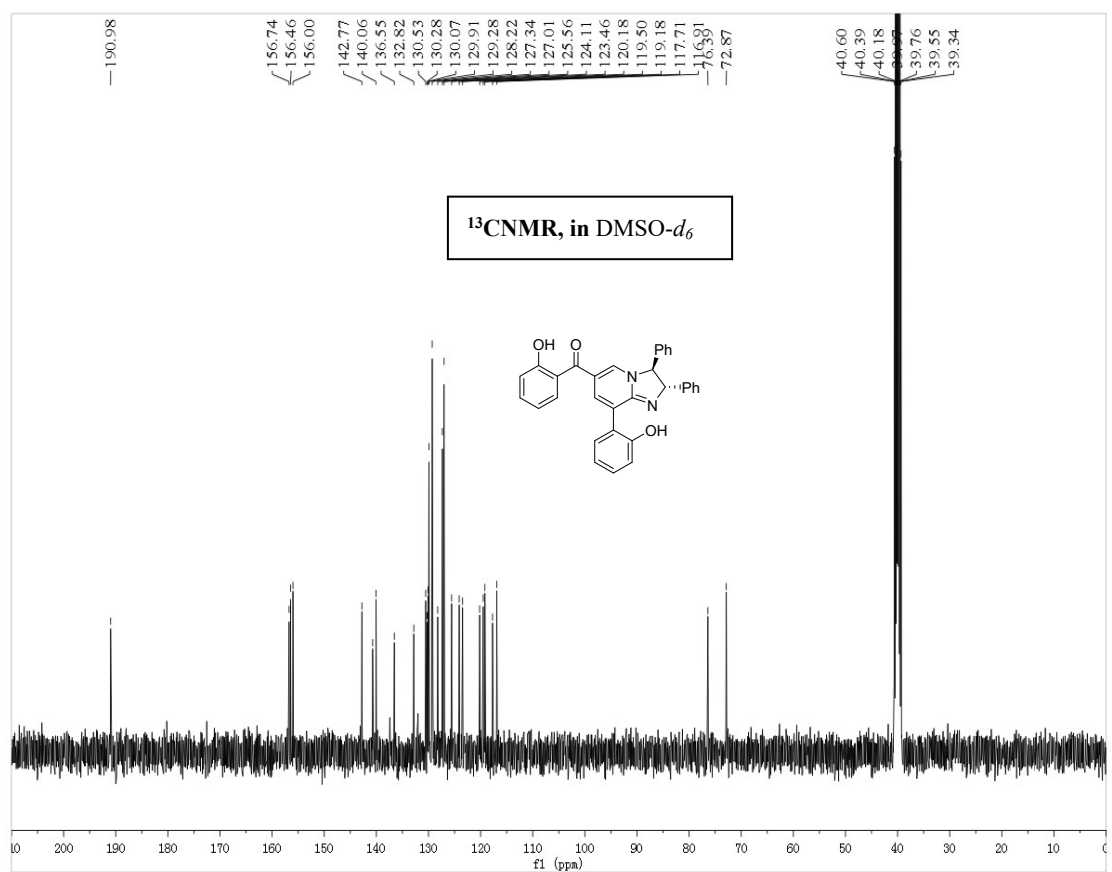

### <sup>1</sup>H and <sup>13</sup>C NMR of 4b

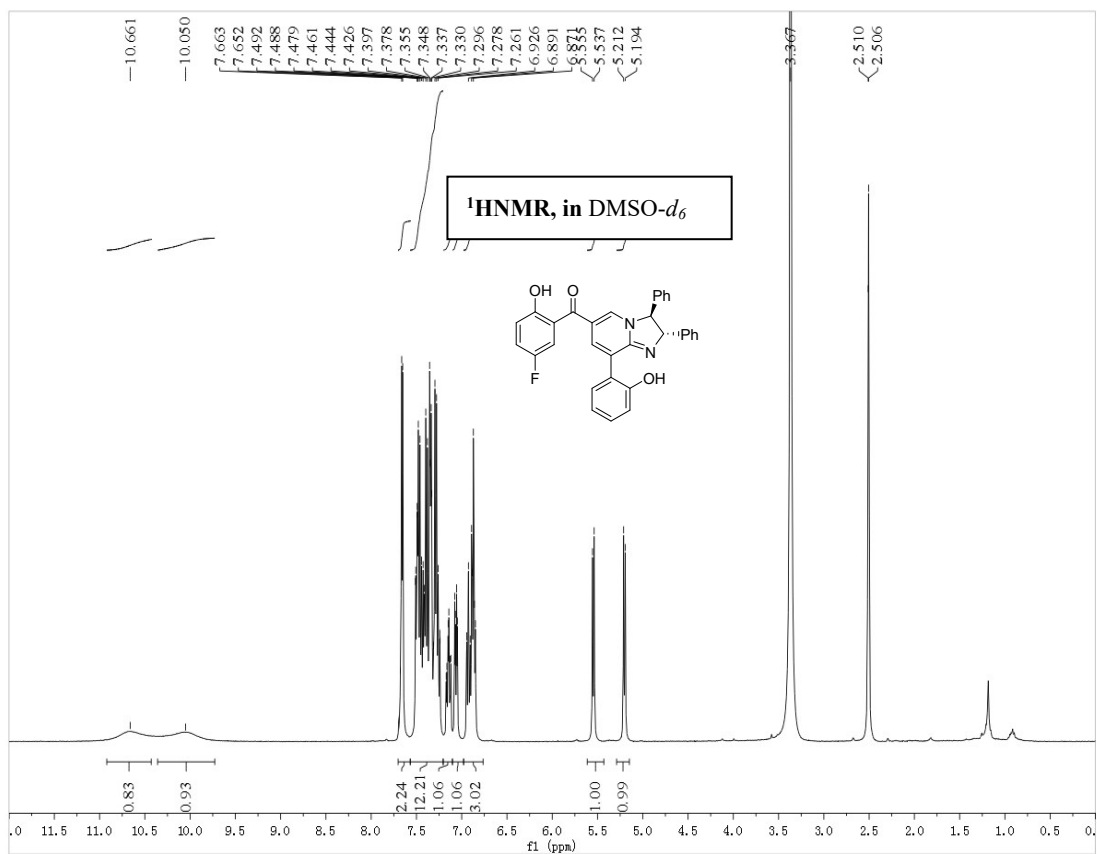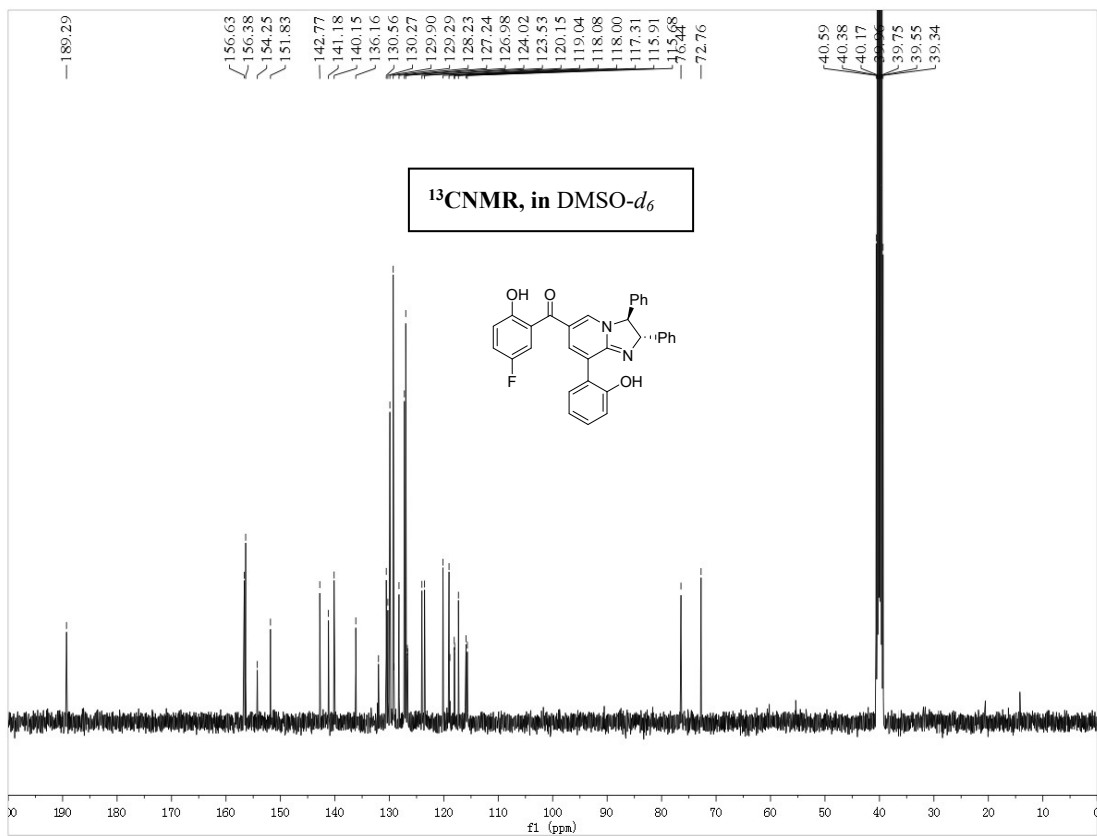

**$^{19}\text{F}$  NMR of 4b**

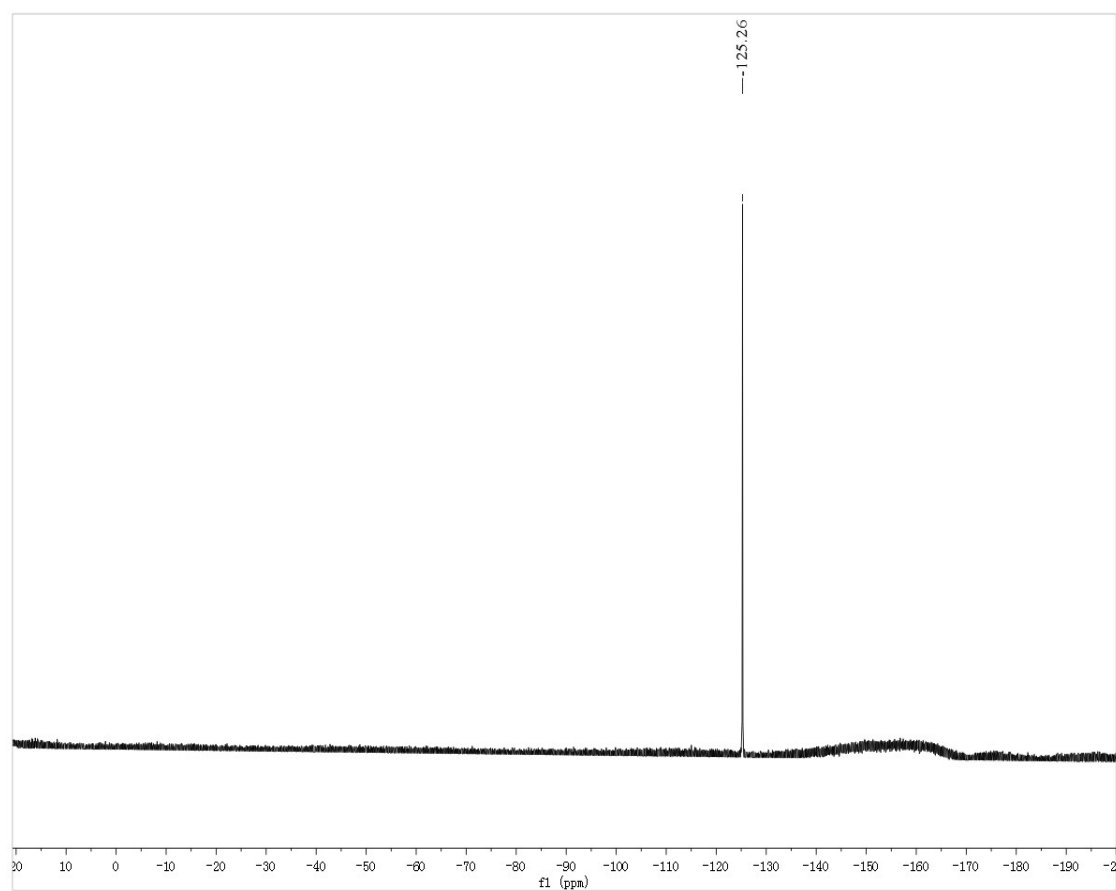



# $^1\text{H}$ and $^{13}\text{C}$ NMR of 4c

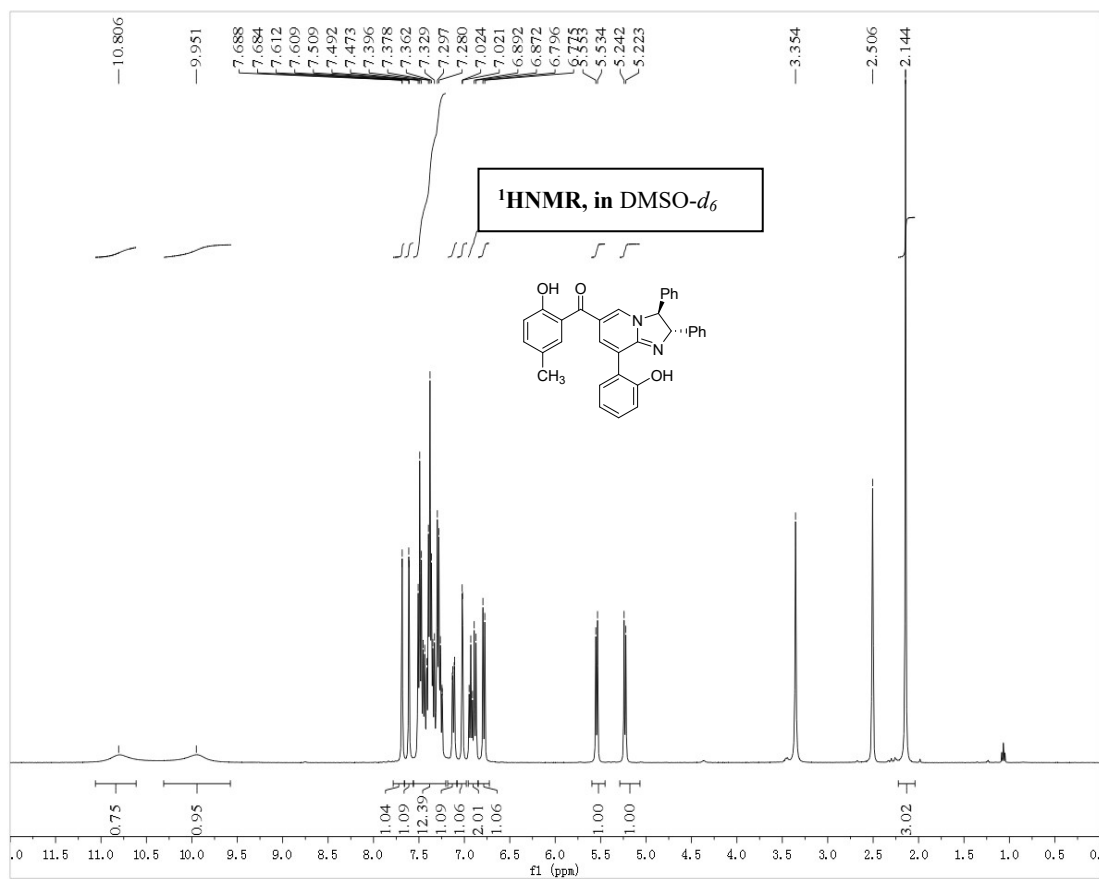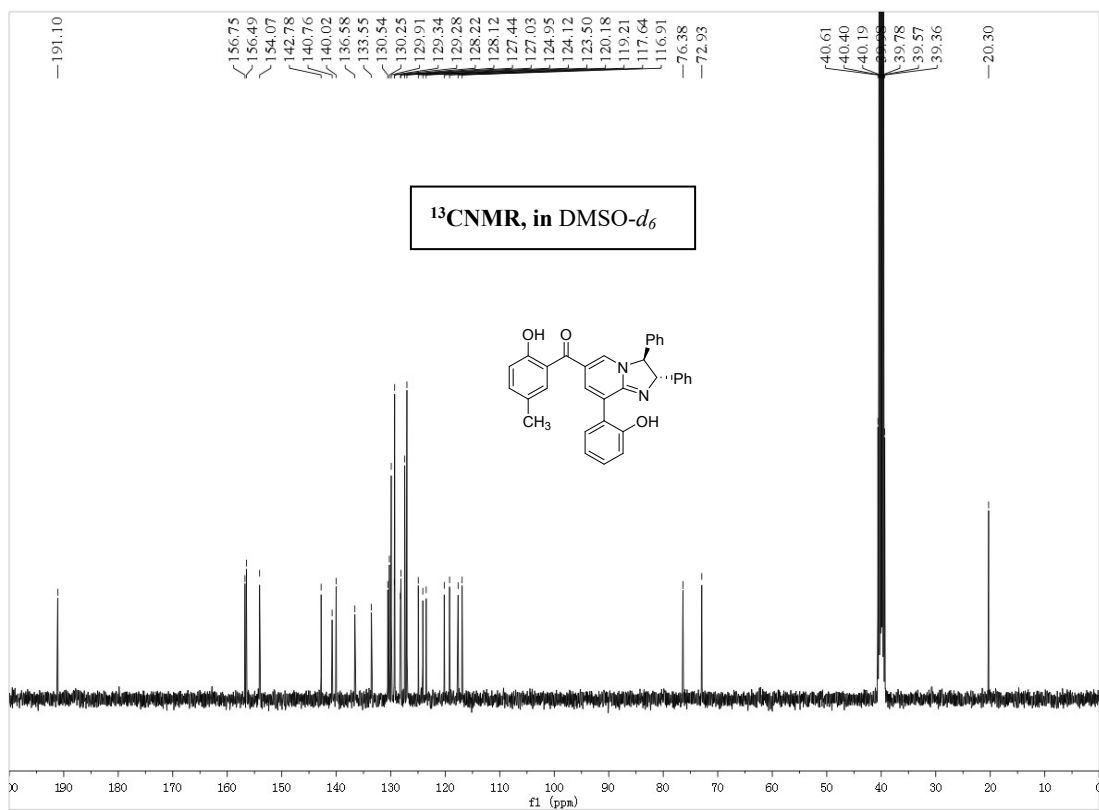

# <sup>1</sup>H and <sup>13</sup>C NMR of 4d

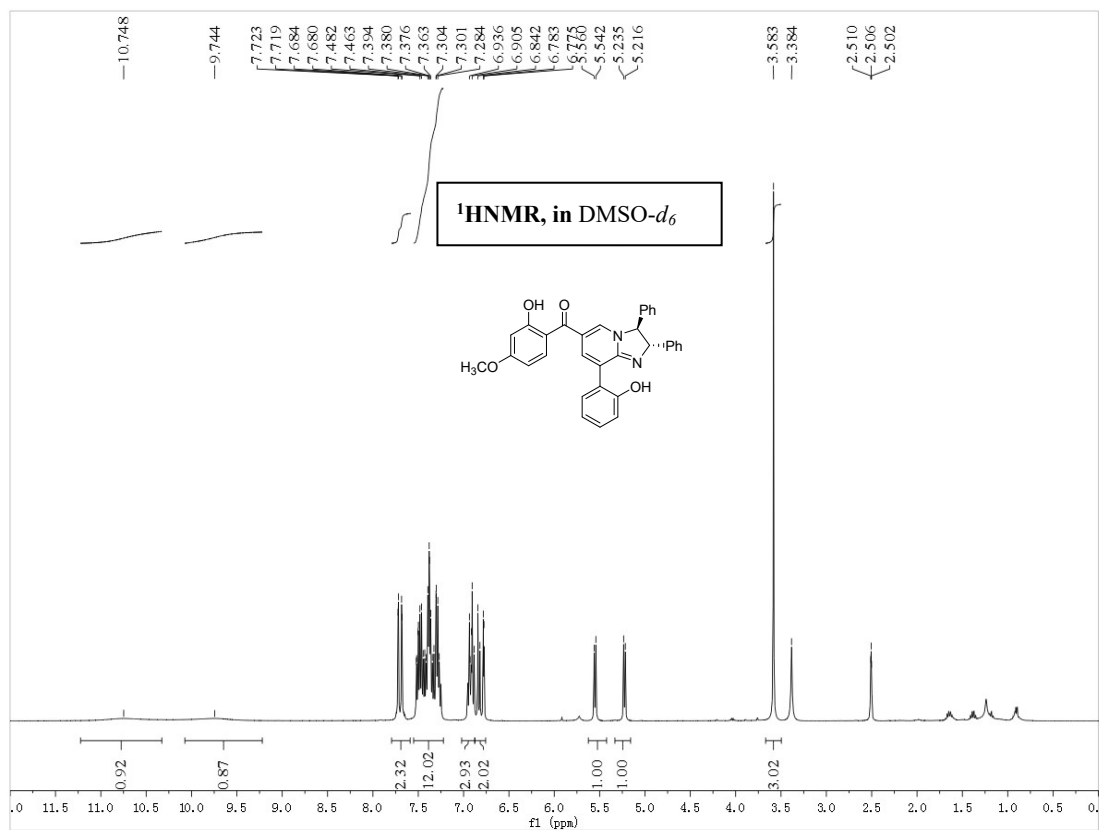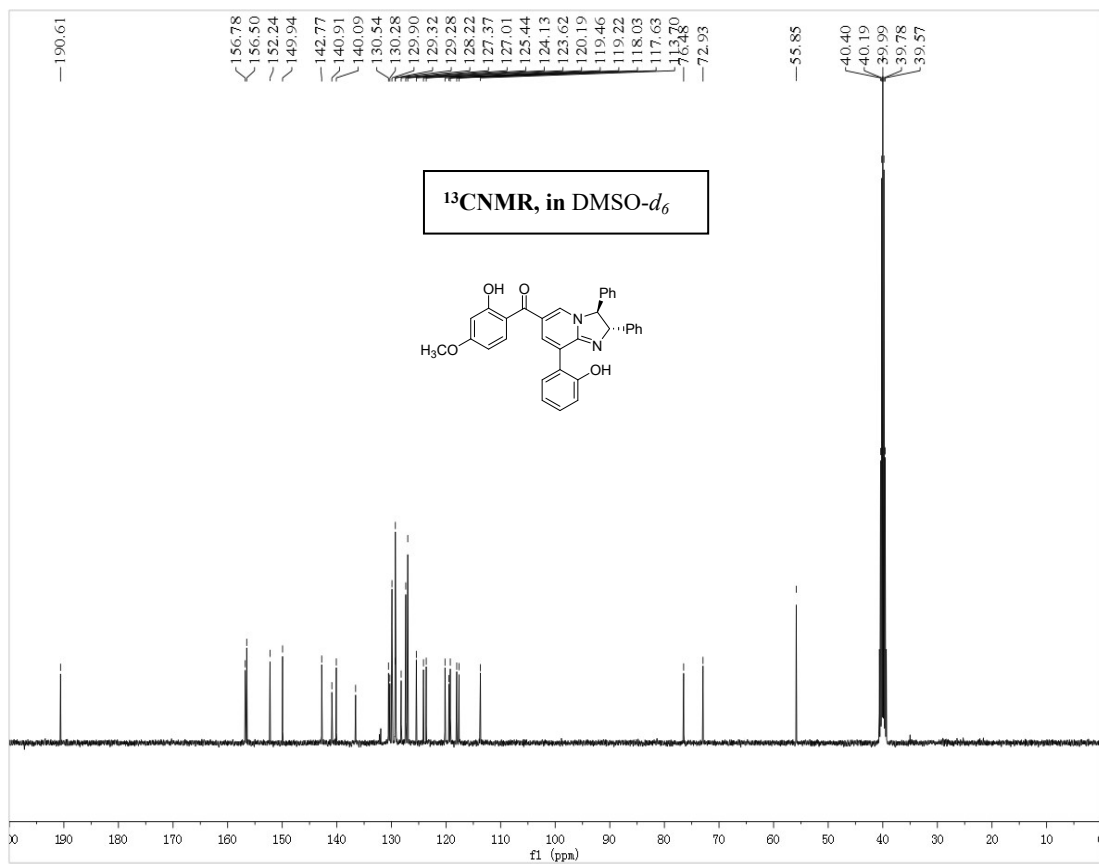

### <sup>1</sup>H and <sup>13</sup>C NMR of 4e

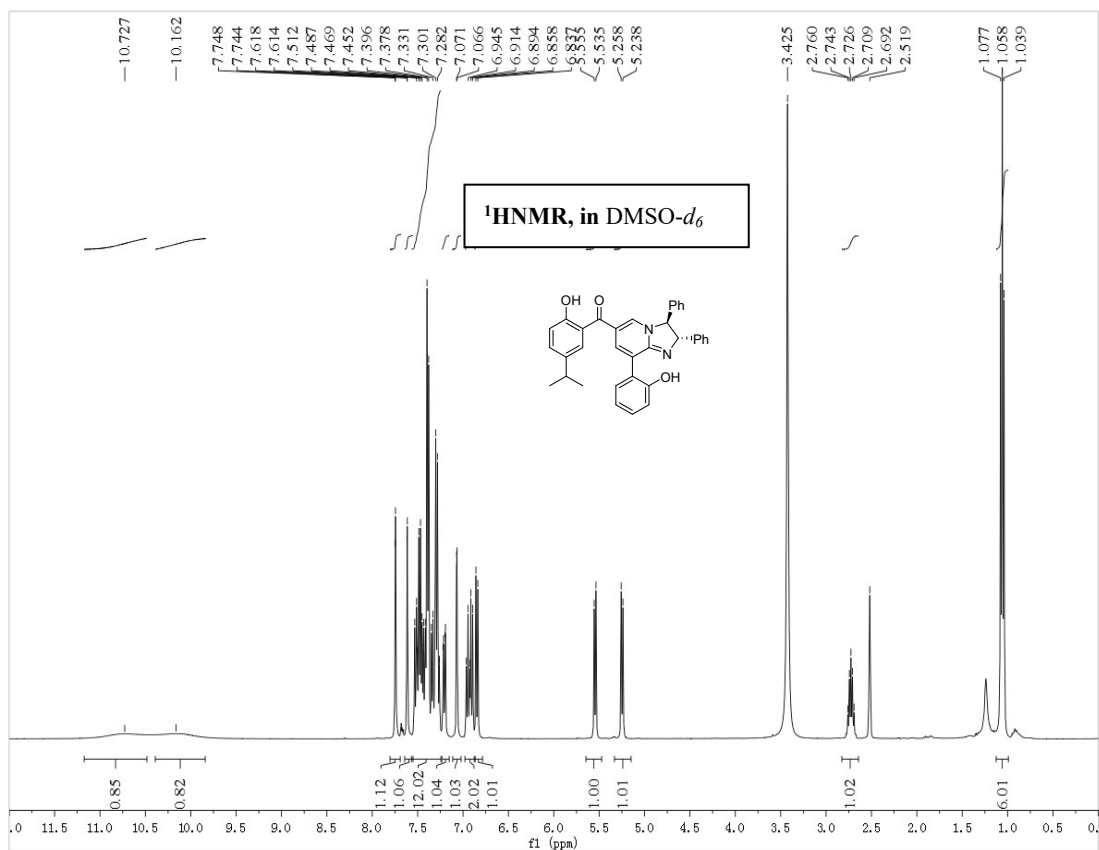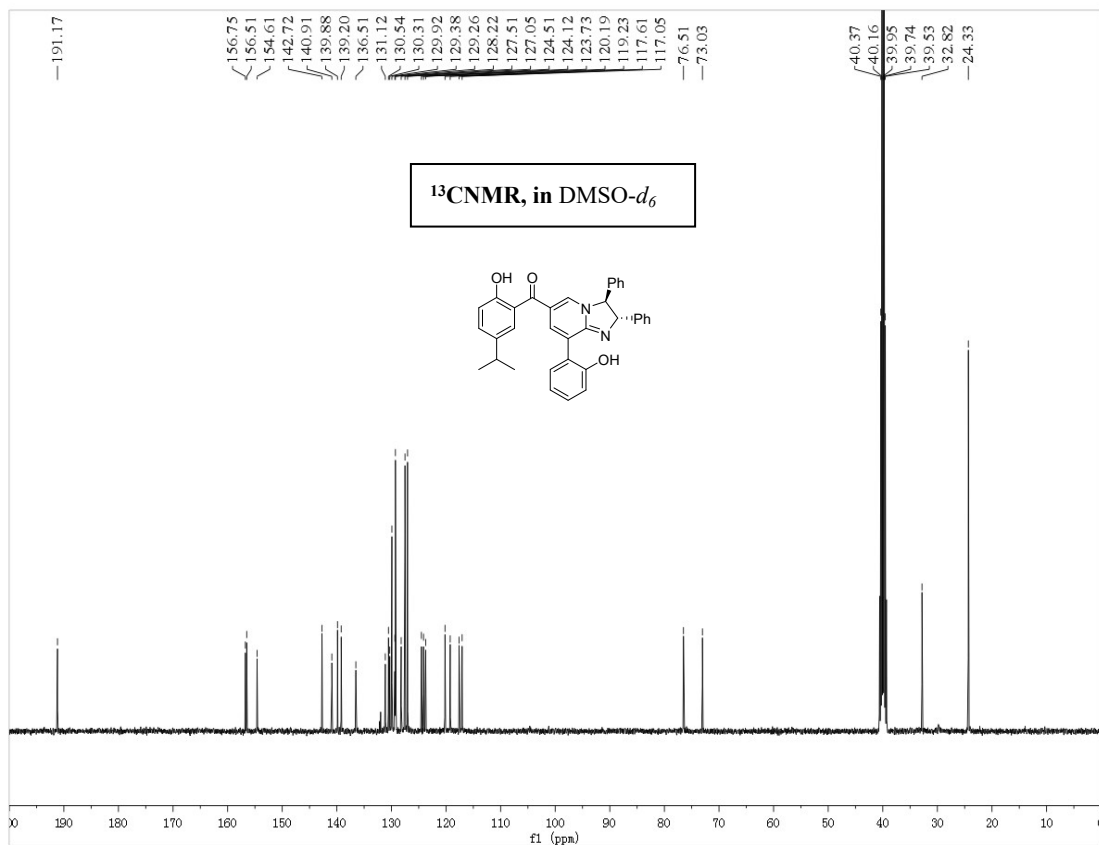

### $^1\text{H}$ and $^{13}\text{C}$ NMR of 4f

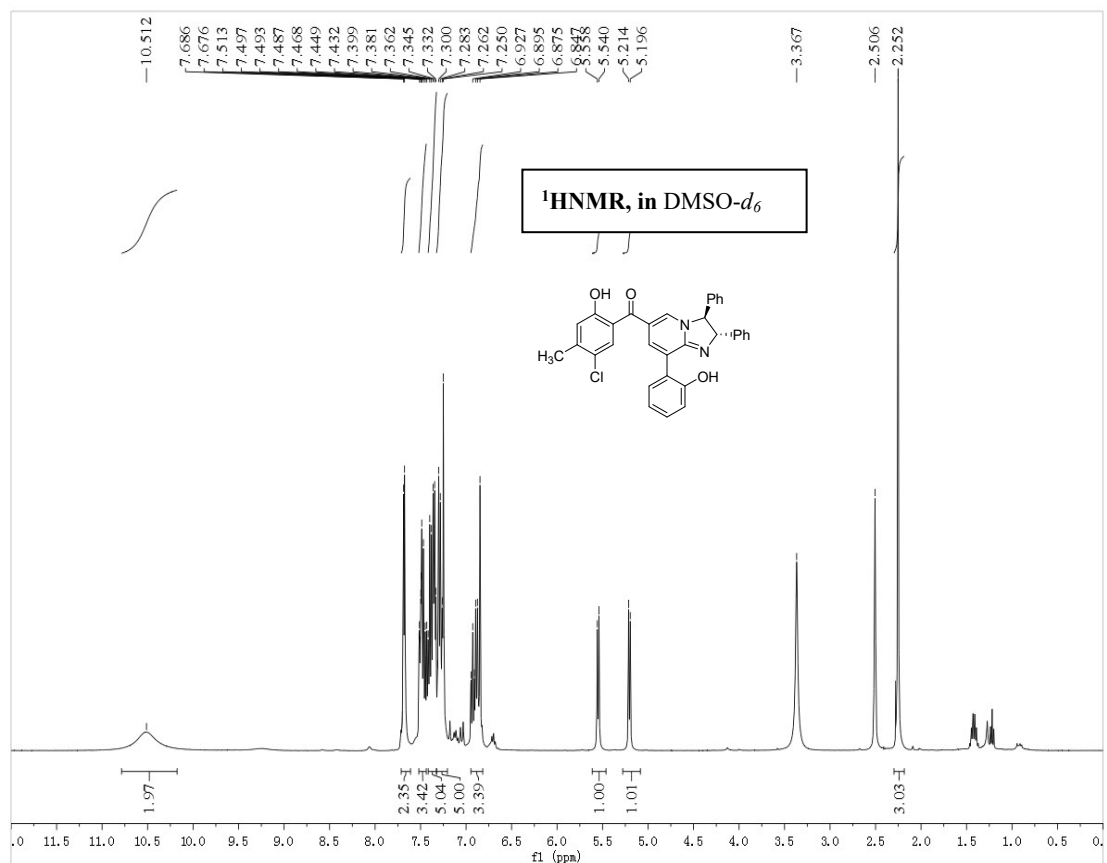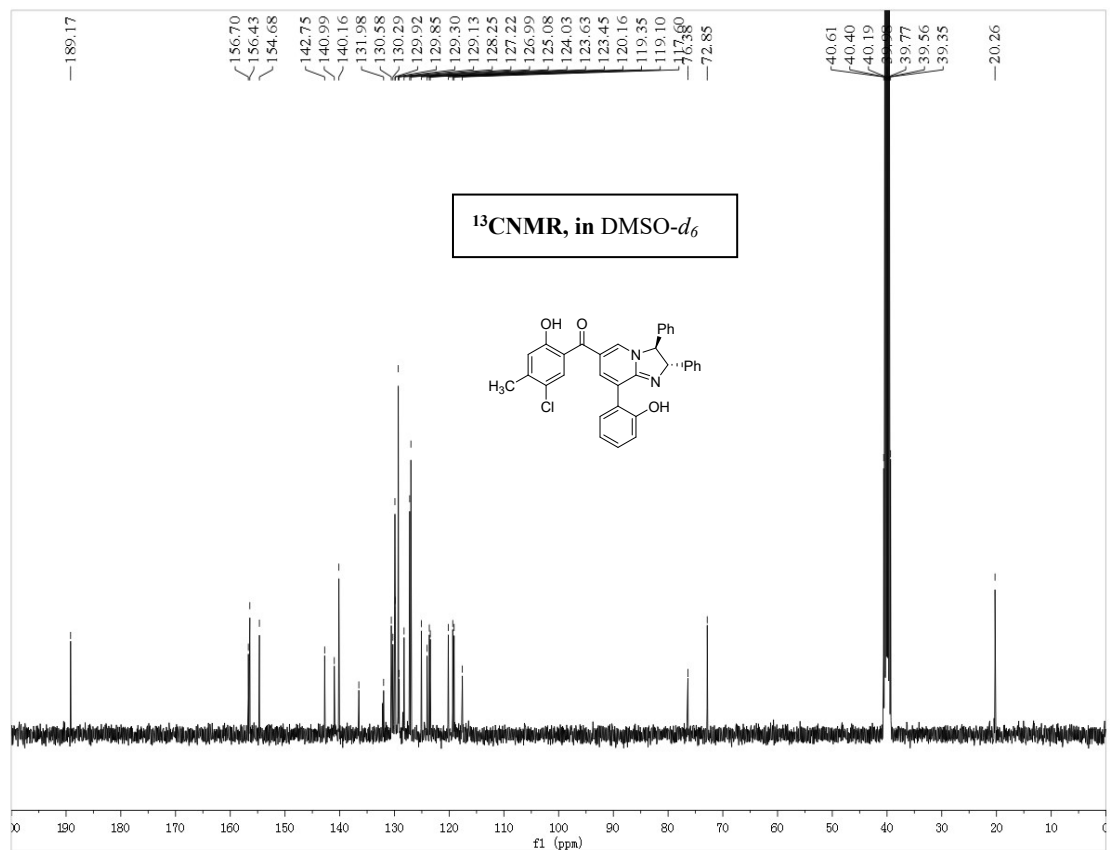

### <sup>1</sup>H and <sup>13</sup>C NMR of 4g

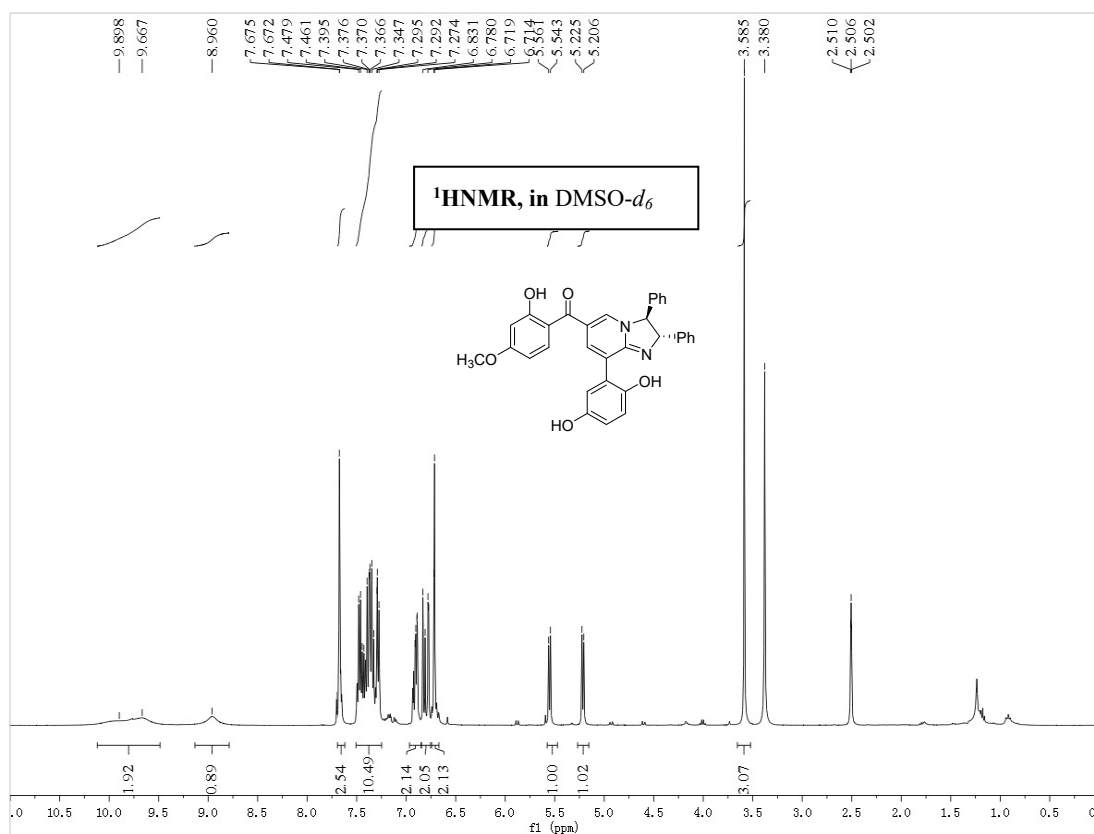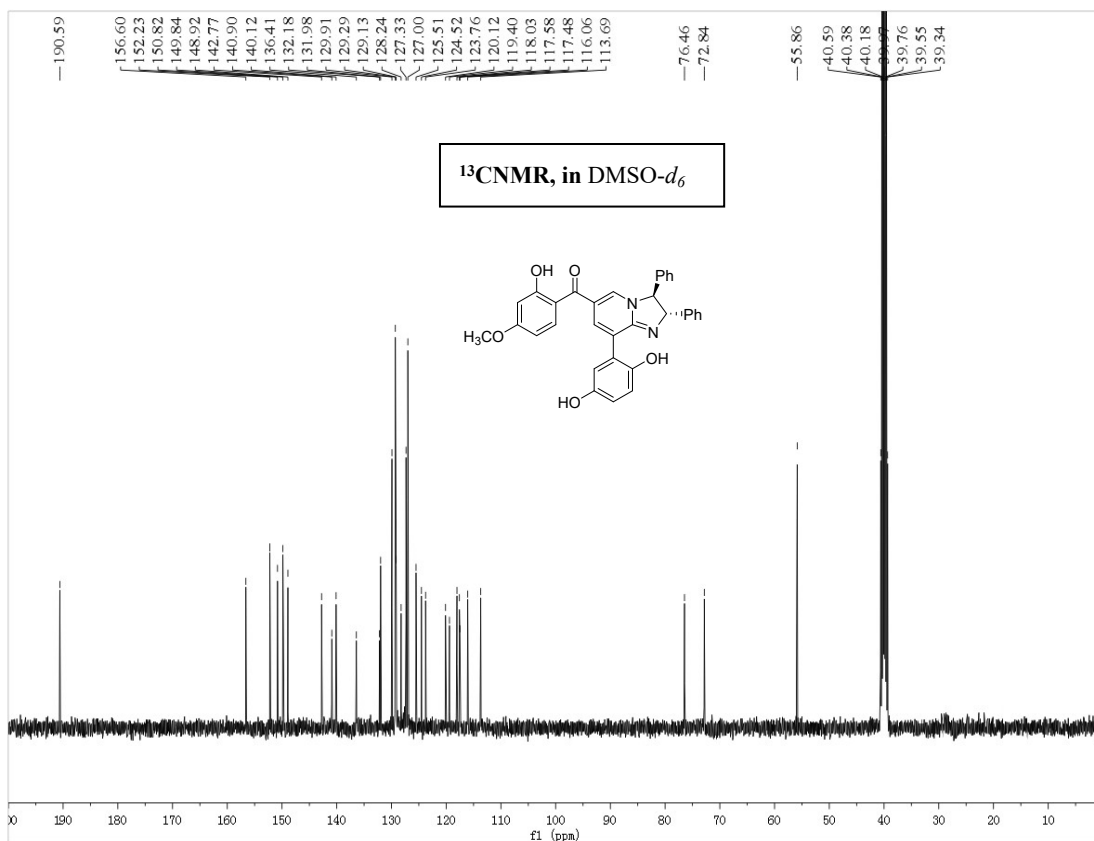

# <sup>1</sup>H and <sup>13</sup>C NMR of 4h

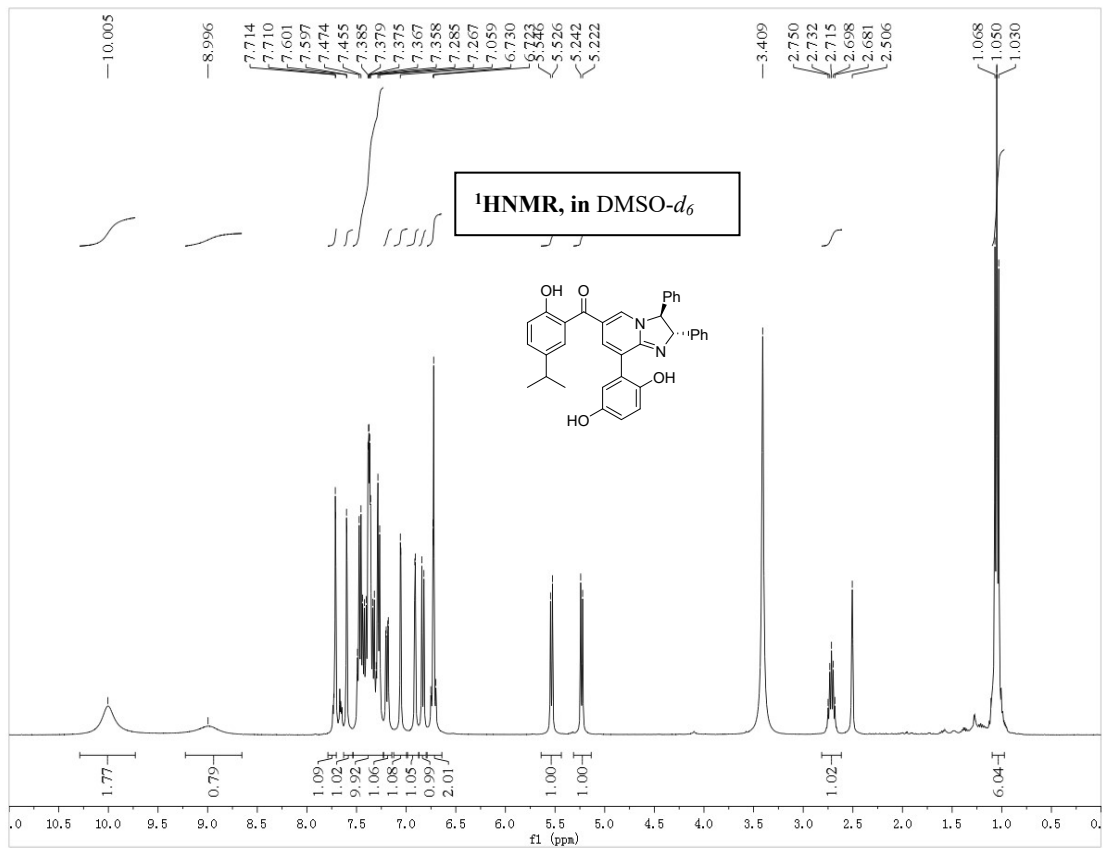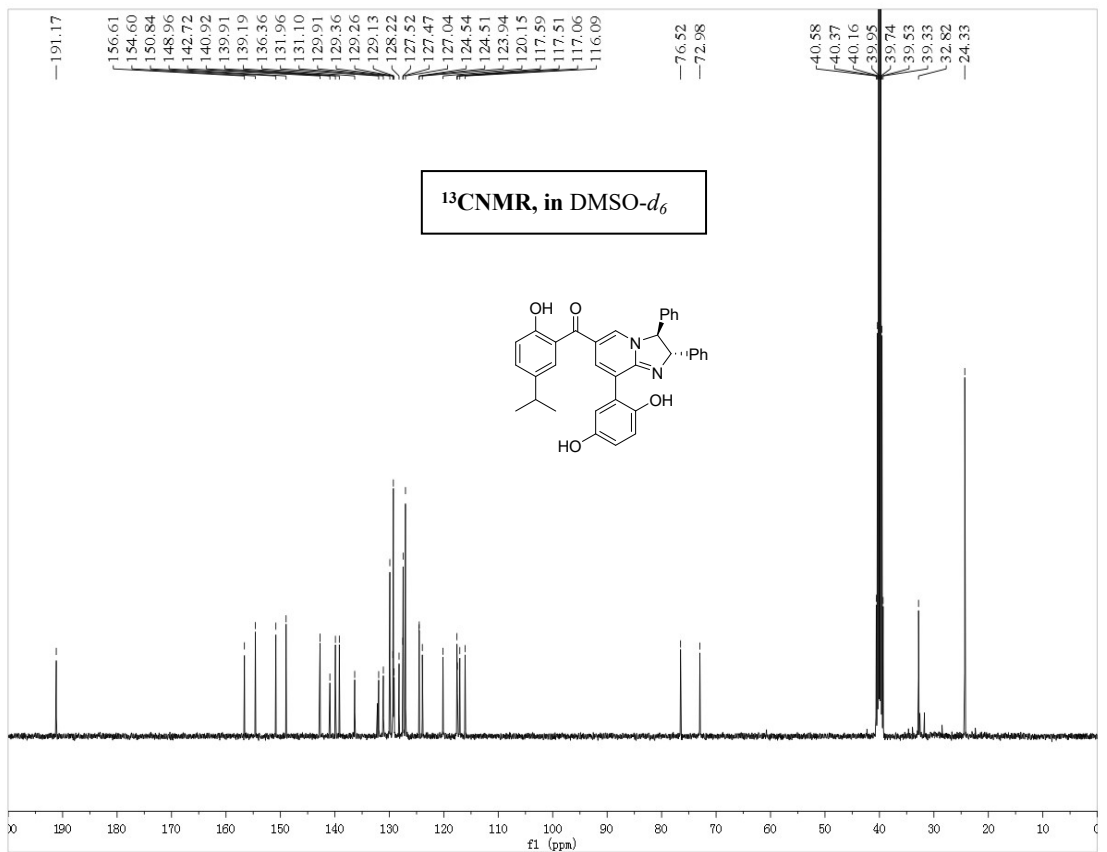

# <sup>1</sup>H and <sup>13</sup>C NMR of 4i

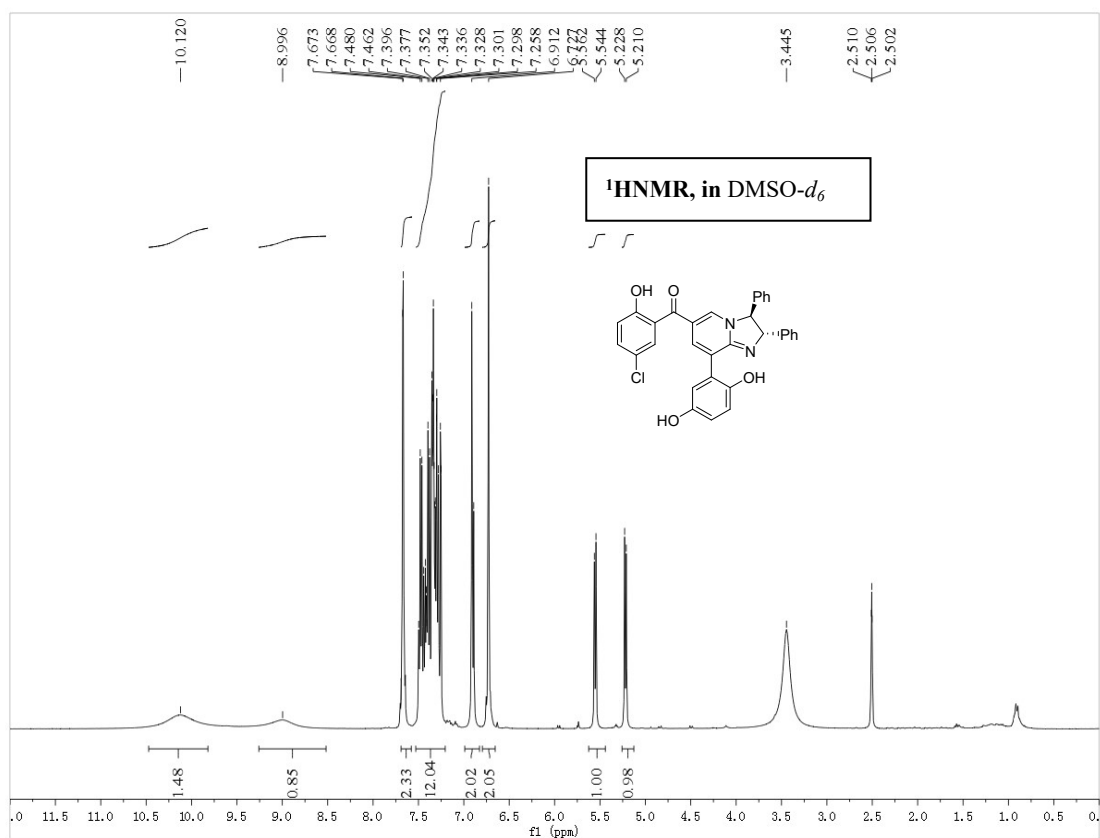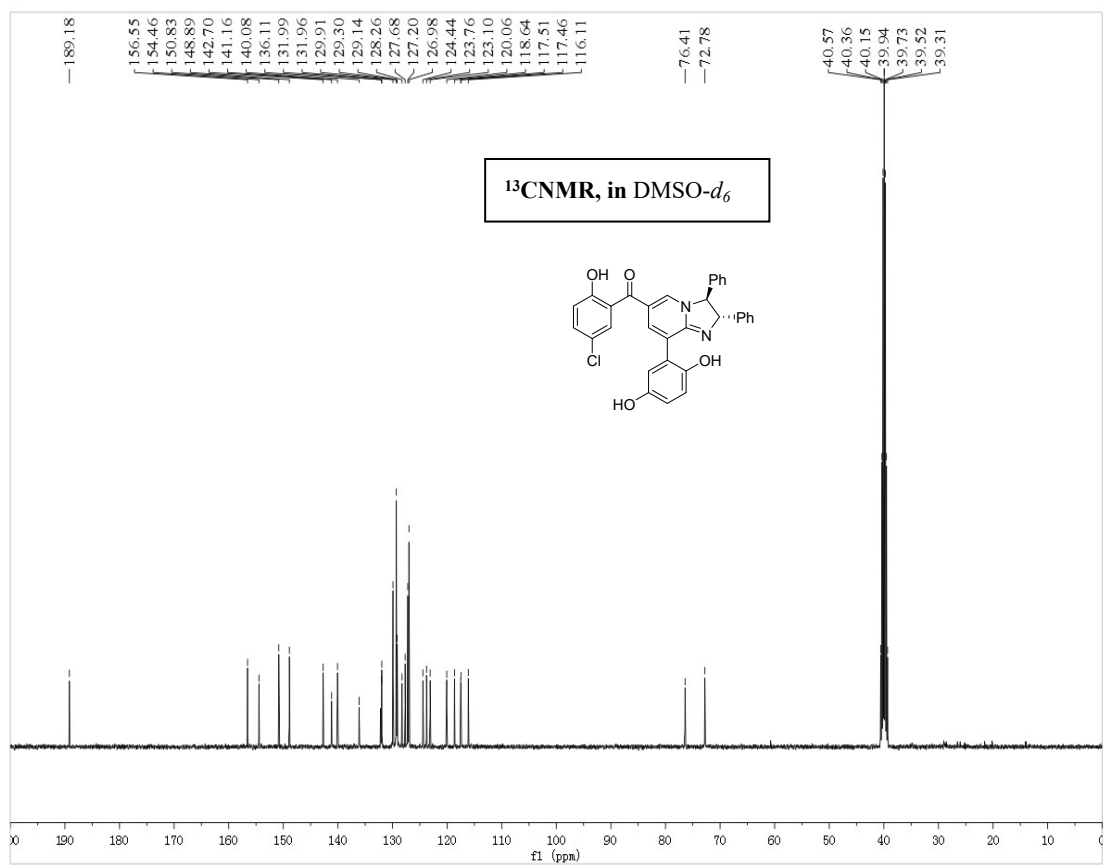

# <sup>1</sup>H and <sup>13</sup>C NMR of 4j

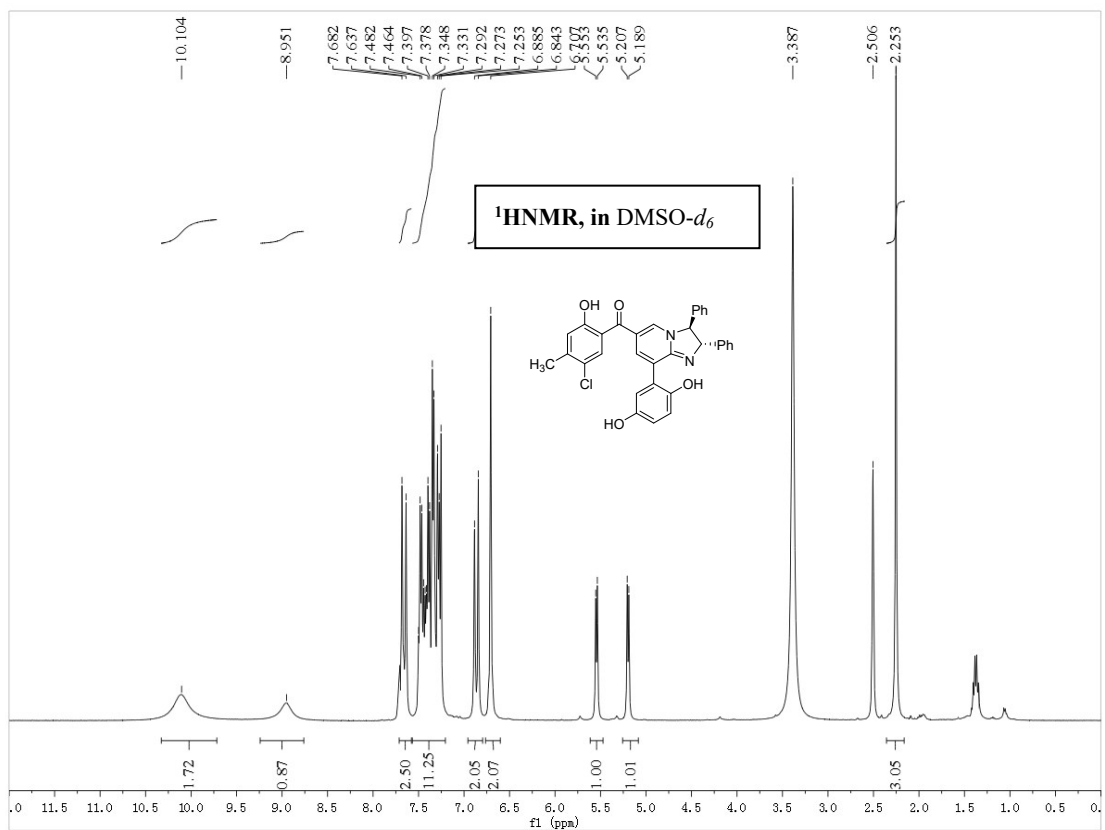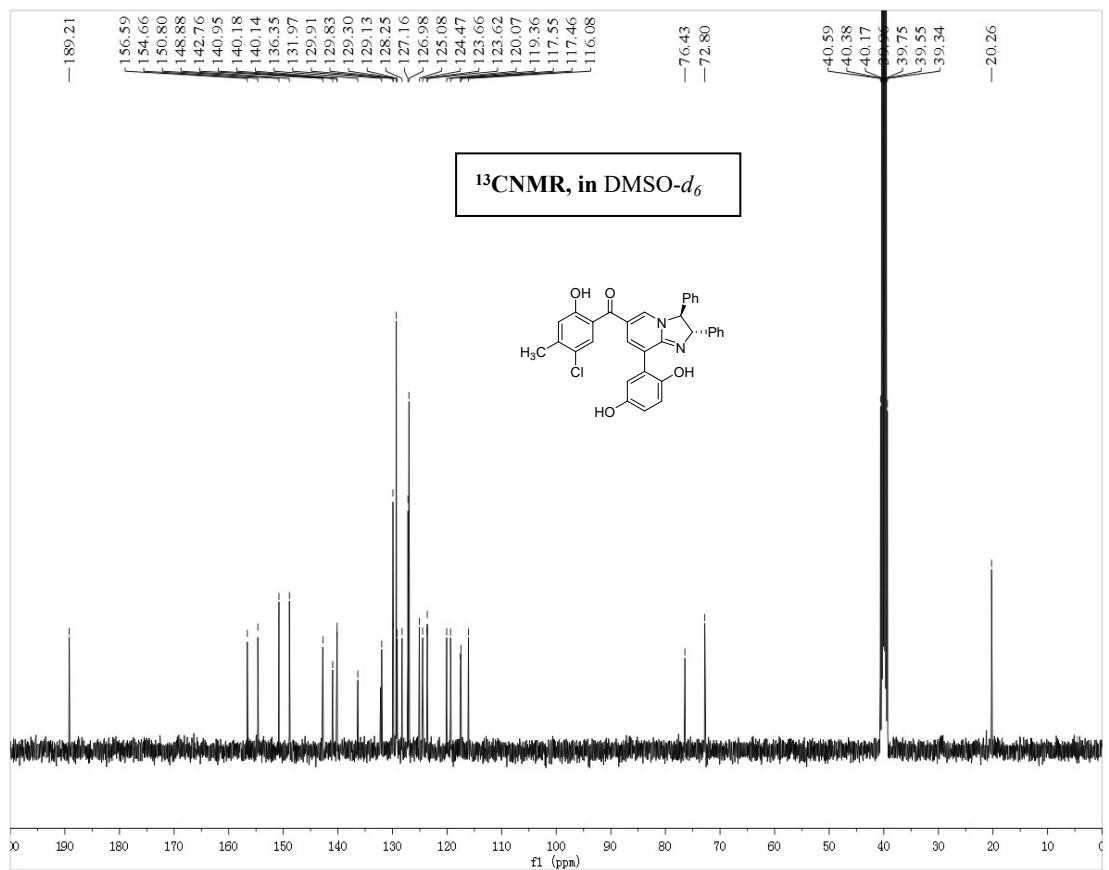



# <sup>1</sup>H and <sup>13</sup>C NMR of 4k

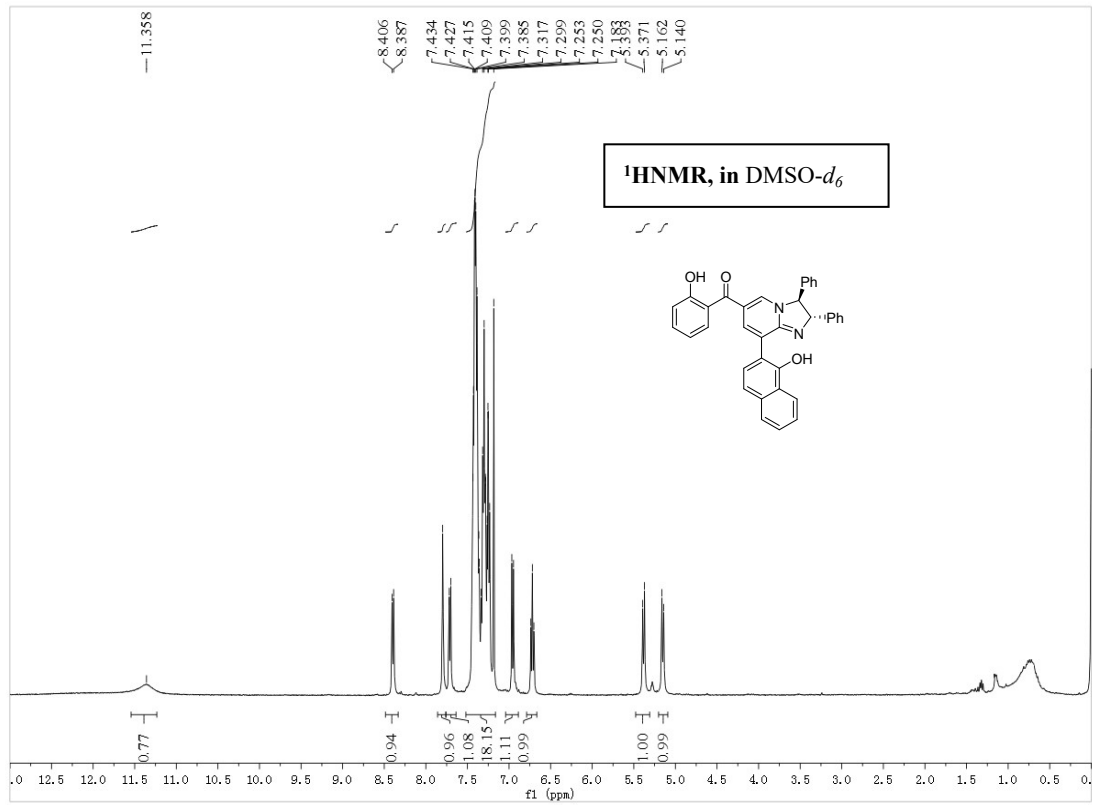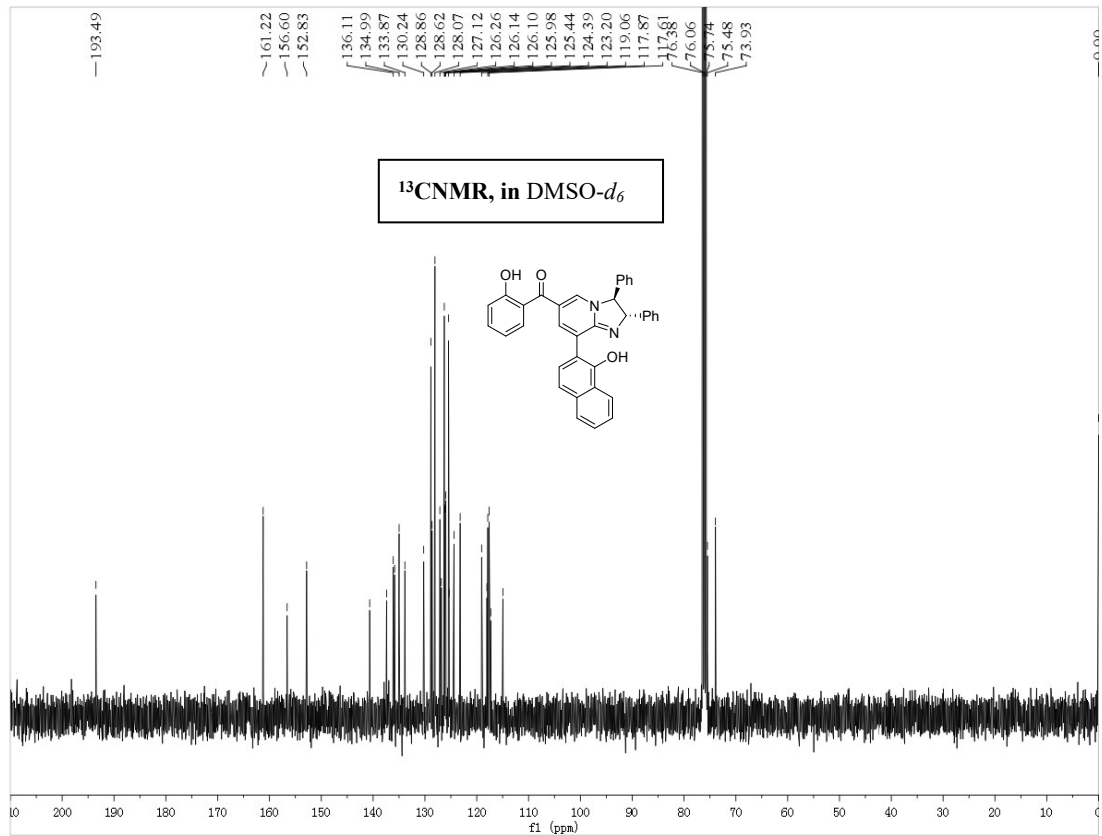

# <sup>1</sup>H and <sup>13</sup>C NMR of 7a

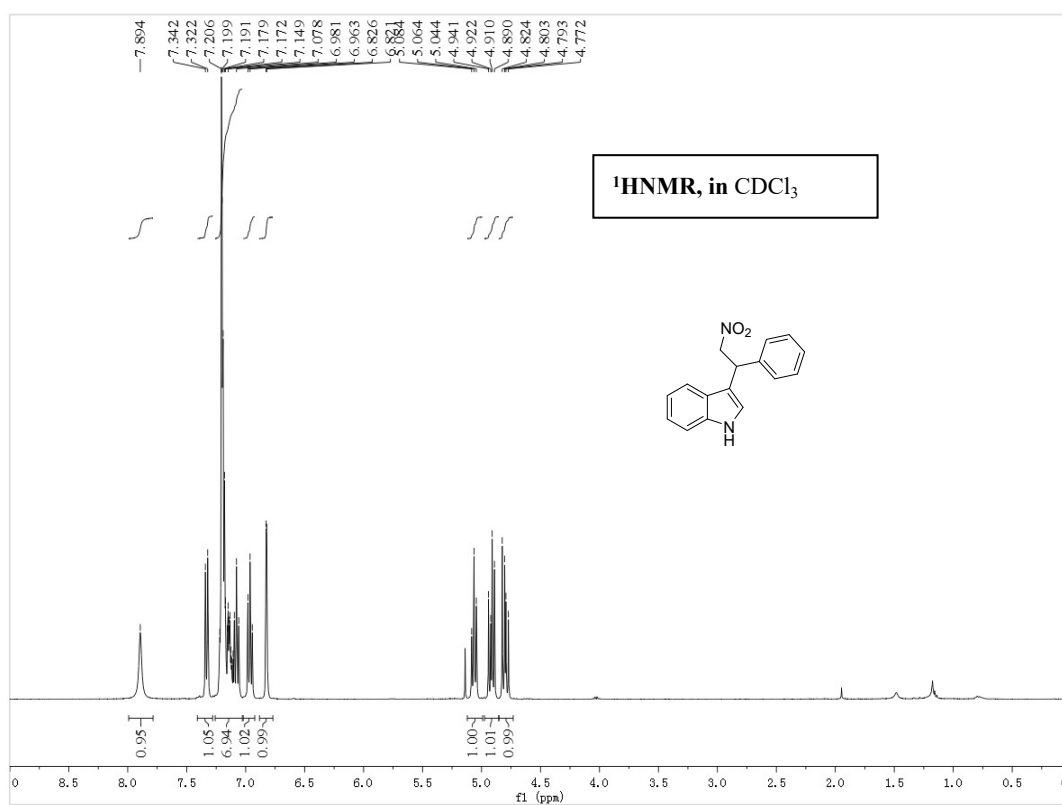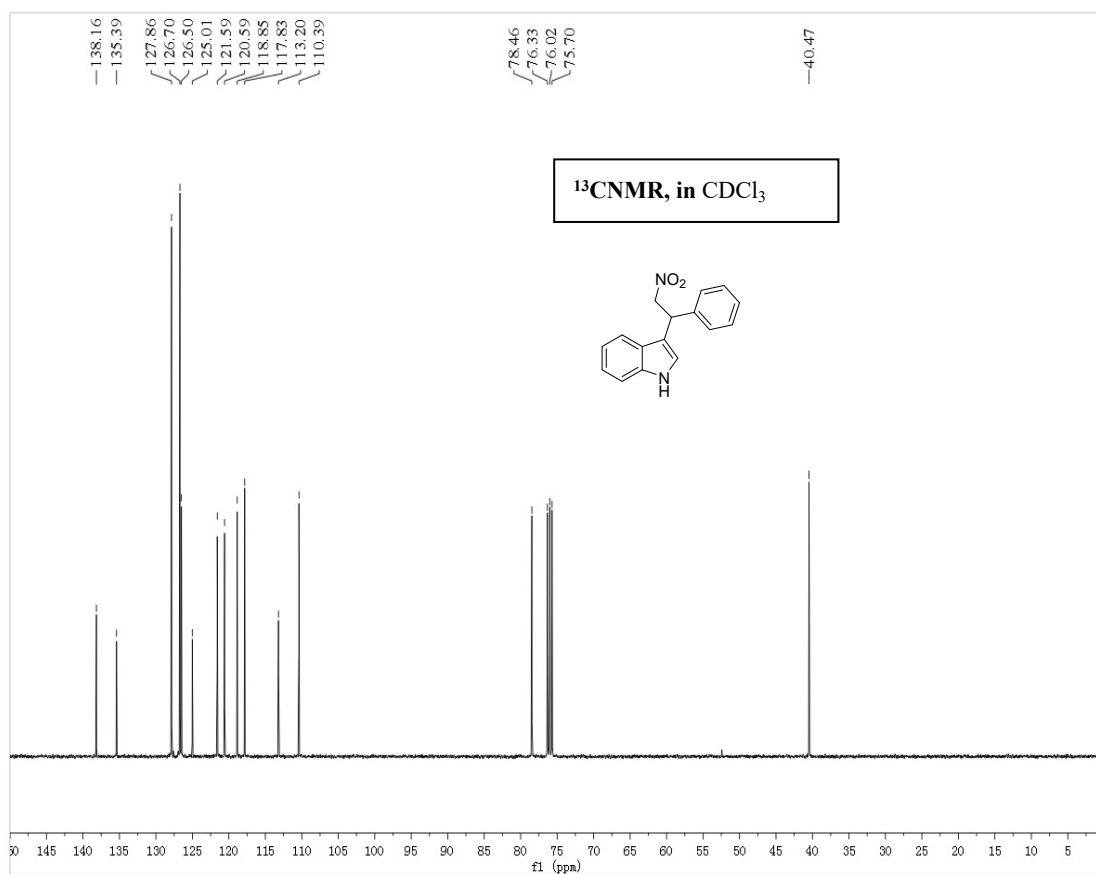

## HPLC of 7a

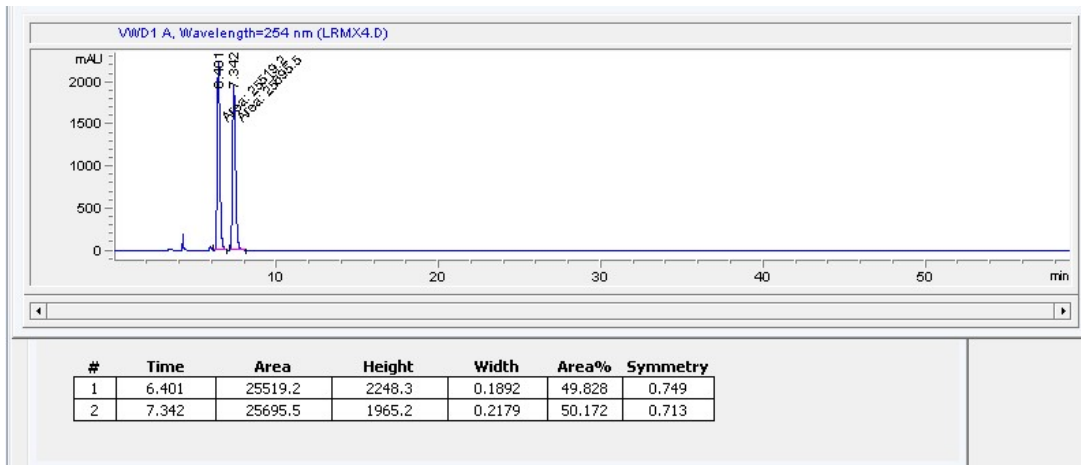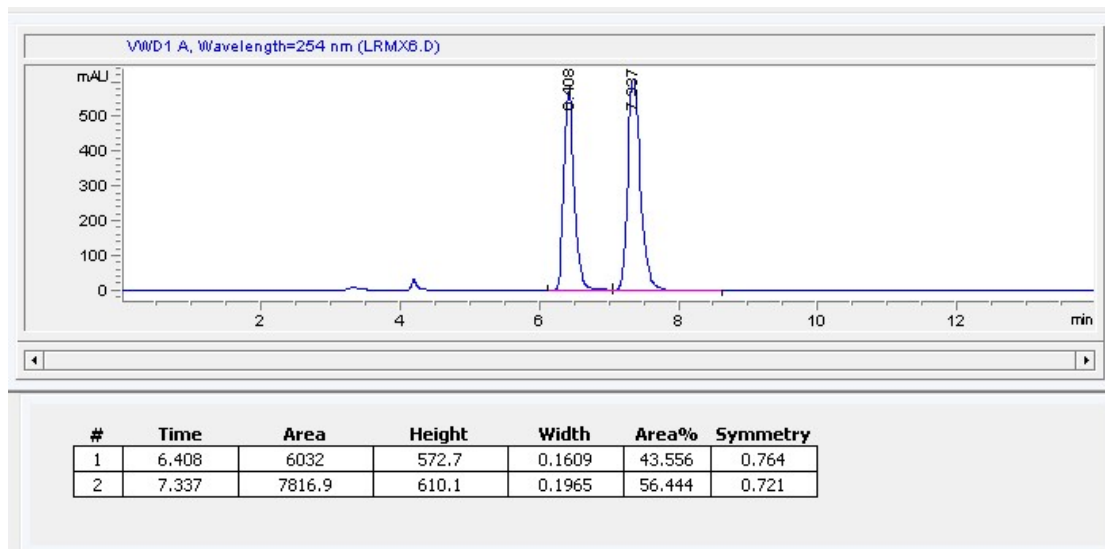

Supplement: d1ob02432a1.pdf [file d1ob02432a1.pdf]
